# Supplementary material for: Topology-driven protein-protein interaction network analysis detects genetic sub-networks regulating reproductive capacity
Source: eLife journal article supplement (doi:10.7554/elife.54082), 2020-09-09
Supplement: supp [file elife-54082-supp-v1.zip]

| Sub-Network                      | Number of Seeds | Number of Connectors | Number of connector genes above $ Z_{gene} $ threshold within sub-network phenotype |
|----------------------------------|-----------------|----------------------|-------------------------------------------------------------------------------------|
| <i>hpo[RNAi]</i> Egg Laying      | 58              | 18                   | 7 (41.1%)                                                                           |
| Core                             | 27              | 10                   | 1 (10.0%)                                                                           |
| Egg Laying                       | 49              | 11                   | 0 (0.0%)                                                                            |
| <i>hpo[RNAi]</i> Ovariole Number | 66              | 11                   | 3 (27.2%)                                                                           |
