# Supplementary material for: Topology-driven protein-protein interaction network analysis detects genetic sub-networks regulating reproductive capacity
Source: eLife journal article supplement (doi:10.7554/elife.54082), 2020-09-09
Supplement: supp [file elife-54082-supp-v1.zip]

Archive with 17 entries (17 files):
- elife_poa_e54082_Transparent_Reporting_File.docx
- elife_poa_e54082_Figure_1_figure_supplement_1.pdf
- elife_poa_e54082_Figure_3_figure_supplement_1.pdf
- elife_poa_e54082_Figure_3_figure_supplement_2.pdf
- elife_poa_e54082_Figure_4_figure_supplement_1.pdf
- elife_poa_e54082_Figure_4_figure_supplement_2.pdf
- elife_poa_e54082_Figure_4_figure_supplement_3.pdf
- elife_poa_e54082_Figure_5_figure_supplement_1.pdf
- elife_poa_e54082_Figure_5_figure_supplement_2.pdf
- elife_poa_e54082_Figure_5_figure_supplement_3.pdf
- elife_poa_e54082_Figure_5_figure_supplement_4.pdf
- elife_poa_e54082_Figure_5_figure_supplement_5.pdf
- elife_poa_e54082_Figure_5_figure_supplement_6.pdf
- elife_poa_e54082_Figure_6_figure_supplement_1.pdf
- elife_poa_e54082_Figure_7_figure_supplement_1.pdf
- elife_poa_e54082_Figure_7_figure_supplement_2.pdf
- elife_poa_e54082_Supplementary_file_1.csv
