# Supplementary material for: Topology-driven protein-protein interaction network analysis detects genetic sub-networks regulating reproductive capacity
Source: eLife journal article supplement (doi:10.7554/elife.54082), 2020-09-09
Supplement: supp [file elife-54082-supp-v1.zip]

Fig 4 Supp 1

| Centrality metric | <i>hpo[RNAi]</i><br>Ovariole Number | <i>hpo[RNAi]</i> Egg<br>Laying | Egg Laying |
|-------------------|-------------------------------------|--------------------------------|------------|
| Betweenness       | 0.603                               | 0.57                           | 0.586      |
| EigenVector       | 0.632                               | 0.573                          | 0.586      |
| Closeness         | 0.612                               | 0.551                          | 0.588      |
| Degrees           | 0.615                               | 0.592                          | 0.599      |
