# Supplementary material for: Topology-driven protein-protein interaction network analysis detects genetic sub-networks regulating reproductive capacity
Source: eLife journal article supplement (doi:10.7554/elife.54082), 2020-09-09
Supplement: supp [file elife-54082-supp-v1.zip › elife_poa_e54082_Figure_7_figure_supplement_2.pdf]

| Unique Genes with RNAis  |     | Number of genes above threshold in                 |                                |                                                    |                                                            |                      |
|--------------------------|-----|----------------------------------------------------|--------------------------------|----------------------------------------------------|------------------------------------------------------------|----------------------|
|                          |     | <i>hpo[RNAi]</i><br>Egg Laying<br>$Z_{gene} >  1 $ | Egg Laying<br>$Z_{gene} >  5 $ | <i>hpo[RNAi]</i><br>Egg Laying<br>$Z_{gene} >  5 $ | <i>hpo[RNAi]</i><br>Ovariole<br>Number<br>$Z_{gene} >  2 $ | All three<br>screens |
| Connectors               | 42  | 32                                                 | 10/32<br>(31.2%)               | 13/42<br>(30.9%)                                   | 12/32<br>(37.5%)                                           | 8/32 (25%)           |
| Signalling<br>candidates | 463 | 273                                                | 49/273<br>(17.9%)              | 59/463<br>(12.7%)                                  | 67/273<br>(24.5%)                                          | 27/273<br>(9.8%)     |
