# Supplementary material for: Topology-driven protein-protein interaction network analysis detects genetic sub-networks regulating reproductive capacity
Source: eLife journal article supplement (doi:10.7554/elife.54082), 2020-09-09
Supplement: supp [file elife-54082-supp-v1.zip › elife_poa_e54082_Supplementary_file_1.csv]

FbID	CG number	NAME	SYMBOL	HippoRNAi_EggL_Day_1_Egg_Count	HippoRNAi_EggL_Day_1_Egg_Zscore	HippoRNAi_EggL_Day_2_Egg_Count	HippoRNAi_EggL_Day_2_Egg_Zscore	HippoRNAi_EggL_Day_3_Egg_Count	HippoRNAi_EggL_Day_3_Egg_Zscore	HippoRNAi_EggL_Day_4_Egg_Count	HippoRNAi_EggL_Day_4_Egg_Zscore	HippoRNAi_EggL_Day_5_Egg_Count	HippoRNAi_EggL_Day_5_Egg_Zscore	HippoRNAi_EggL_All_Days_Egg_Sum_Count	HippoRNAi_EggL_All_Days_Egg_Sum_Zscore	EggL_Day_1_Egg_Count	EggL_Day_1_Egg_Zscore	EggL_Day_2_Egg_Count	EggL_Day_2_Egg_Zscore	EggL_Day_3_Egg_Count	EggL_Day_3_Egg_Zscore	EggL_Day_4_Egg_Count	EggL_Day_4_Egg_Zscore	EggL_Day_5_Egg_Count	EggL_Day_5_Egg_Zscore	EggL_All_Days_Egg_Sum_Count	EggL_All_Days_Egg_Sum_Zscore	HippoRNAi_Ova_OvarioleNb_Fly_1.1_Count	HippoRNAi_Ova_OvarioleNb_Fly_1.2_Count	HippoRNAi_Ova_OvarioleNb_Fly_2.1_Count	HippoRNAi_Ova_OvarioleNb_Fly_2.2_Count	HippoRNAi_Ova_OvarioleNb_Fly_3.1_Count	HippoRNAi_Ova_OvarioleNb_Fly_3.2_Count	HippoRNAi_Ova_OvarioleNb_Fly_4.1_Count	HippoRNAi_Ova_OvarioleNb_Fly_4.2_Count	HippoRNAi_Ova_OvarioleNb_Fly_5.1_Count	HippoRNAi_Ova_OvarioleNb_Fly_5.2_Count	HippoRNAi_Ova_OvarioleNb_Fly_6.1_Count	HippoRNAi_Ova_OvarioleNb_Fly_6.2_Count	HippoRNAi_Ova_OvarioleNb_Fly_7.1_Count	HippoRNAi_Ova_OvarioleNb_Fly_7.2_Count	HippoRNAi_Ova_OvarioleNb_Fly_8.1_Count	HippoRNAi_Ova_OvarioleNb_Fly_8.2_Count	HippoRNAi_Ova_OvarioleNb_Fly_9.1_Count	HippoRNAi_Ova_OvarioleNb_Fly_9.2_Count	HippoRNAi_Ova_OvarioleNb_Fly_10.1_Count	HippoRNAi_Ova_OvarioleNb_Fly_10.2_Count	HippoRNAi_Ova_OvarioleNb_Mean_Count	HippoRNAi_Ova_OvarioleNb_Std_Count
FBgn0000042	CG4027	Actin 5C	Act5C	0.0	-4.3294	0.0	-3.7259	0.0	-2.7062	0.0	-2.0176	0.0	-0.9066	0.0	-6.7197	0.0	-3.1045	0.0	-4.3731	0.0	-2.5058	0.0	-2.4871	0.0	-3.7675	0.0	-4.8103	16.0	17.0	11.0	7.0	14.0	18.0	17.0	15.0	16.0	16.0	14.0	15.0	17.0	18.0	16.0	15.0	12.0	16.0	13.0	18.0	15.05	2.704285098641939
FBgn0000043	CG12051	Actin 42A	Act42A	29.0	-0.7524	54.0	0.2401	81.0	1.2868	20.0	-0.4296	23.0	-0.0397	207.0	0.1388
FBgn0000044	CG10067	Actin 57B	Act57B	106.0	1.9464	55.0	-0.1002	28.0	0.3446	30.0	3.5155	31.0	1.0923	250.0	2.3447	149.0	1.4916	48.0	-1.1166	74.0	4.6396	28.0	0.6785	45.0	0.9652	344.0	2.5147	23.0	22.0	20.0	21.0	24.0	21.0	22.0	23.0	23.0	20.0	19.0	22.0	22.0	22.0	23.0	21.0	23.0	22.0	20.0	22.0	21.75	1.2926920095594878
FBgn0000046	CG18290	Actin 87E	Act87E	110.0	7.4292	70.0	-2.0017	39.0	1.7757	36.0	-1.4634	38.0	0.5529	293.0	1.5207	152.0	2.9848	57.0	1.1776	53.0	14.7885	34.0	2.4802	26.0	-0.246	322.0	6.8044	19.0	24.0	22.0	22.0	21.0	20.0	21.0	19.0	22.0	21.0	23.0	22.0	24.0	22.0	22.0	21.0	20.0	20.0	22.0	23.0	21.5	1.4327007988227578
FBgn0000047	CG5178	Actin 88F	Act88F	0.0	-4.7429	0.0	-3.5457	0.0	-2.5488	0.0	-2.8075	0.0	-1.7442	0.0	-9.6009	0.0	-3.1045	0.0	-4.3731	0.0	-2.5058	0.0	-2.4871	0.0	-3.7675	0.0	-4.8103	17.0	12.0	16.0	19.0	15.0	17.0	19.0	20.0	19.0	21.0	21.0	20.0	26.0	28.0	19.0	20.0	21.0	20.0	22.0	19.0	19.55	3.486439897358727
FBgn0000097	CG3166	anterior open	aop	51.0	-2.0475	78.0	0.8094	4.0	-1.4657	13.0	-0.1251	46.0	0.9749	192.0	-0.3225
FBgn0000117	CG11579	armadillo	arm	0.0	-1.7265	0.0	-1.5121	0.0	-2.6317	0.0	-1.657	0.0	-2.3249	0.0	-6.7036	0.0	-2.6099	0.0	-1.3698	0.0	-1.7772	0.0	-2.6546	0.0	-2.5036	0.0	-7.6344	13.0	14.0	18.0	14.0	12.0	16.0	13.0	14.0	17.0	14.0	0.0	0.0	17.0	21.0	0.0	0.0	14.0	12.0	17.0	13.0	11.95	6.516981865217899
FBgn0000119	CG5912	arrow	arr	131.0	5.0546	74.0	6.9288	35.0	0.8426	18.0	-1.0187	28.0	1.5913	286.0	4.1593	136.0	1.2223	39.0	-1.6319	54.0	1.8902	18.0	0.0165	54.0	1.8339	301.0	1.4993	17.0	21.0	17.0	19.0	22.0	18.0	21.0	21.0	19.0	20.0	22.0	17.0	17.0	17.0	22.0	19.0	19.0	20.0	20.0	20.0	19.4	1.7888543819998315
FBgn0000163	CG5055	bazooka	baz	113.0	3.1981	10.0	-1.0131	10.0	-1.1624	5.0	-0.8398	4.0	-2.4373	142.0	-1.6229	94.0	-0.427	14.0	-2.2767	26.0	-1.1543	3.0	-1.5852	2.0	-1.8927	139.0	-3.2398	22.0	20.0	21.0	18.0	20.0	23.0	22.0	20.0	22.0	24.0	22.0	21.0	21.0	24.0	20.0	19.0	20.0	22.0	22.0	24.0	21.35	1.663066286617648
FBgn0000179	CG3578	bifid	bi	95.0	0.3127	50.0	-0.1842	40.0	-0.3007	27.0	0.2522	25.0	0.1936	237.0	0.1805
FBgn0000180	CG4722	big brain	bib	59.0	0.2831	62.0	0.2505	14.0	-0.6203	16.0	0.4005	40.0	2.0561	191.0	0.6978
FBgn0000206	CG8285	bride of sevenless	boss	5.0	-8.4386	64.0	4.7361	27.0	-0.0216	7.0	-3.3534	17.0	0.2238	120.0	-3.1393	102.0	0.5179	106.0	2.2045	36.0	-0.5842	66.0	3.1937	42.0	0.6757	352.0	2.7036	21.0	17.0	19.0	19.0	20.0	21.0	18.0	17.0	19.0	17.0	21.0	18.0	21.0	19.0	17.0	19.0	16.0	19.0	18.0	24.0	19.0	1.9194297398747862
FBgn0000212	CG5942	brahma	brm	90.0	1.2966	34.0	-0.4088	34.0	-0.9869	23.0	-0.2455	16.0	-0.7352	197.0	-0.1917
FBgn0000216	CG3096	Bearded	Brd	67.0	-1.7991	30.0	-2.7189	0.0	-2.9382	0.0	-4.839	0.0	-1.8897	97.0	-4.1505	76.0	-0.0207	68.0	0.0286	2.0	-5.2582	31.0	0.877	13.0	-2.1235	190.0	-1.1216	22.0	21.0	23.0	21.0	22.0	20.0	22.0	23.0	21.0	23.0	20.0	21.0	19.0	19.0	20.0	19.0	22.0	20.0	20.0	24.0	21.1	1.4832396974191324
FBgn0000229	CG5680	basket	bsk	55.0	-1.709	88.0	1.0774	38.0	0.2527	14.0	-0.0357	15.0	-1.5436	210.0	0.1456
FBgn0000250	CG5848	cactus	cact	61.0	-1.2014	40.0	-0.209	70.0	1.87	3.0	-1.0184	34.0	0.0	208.0	0.0936
FBgn0000259	CG15224	Casein kinase II beta subunit	CkIIbeta	1.0	-8.8669	0.0	-9.2968	0.0	-2.9382	0.0	-4.839	0.0	-1.8897	1.0	-8.3714	1.0	-1.5745	4.0	-3.636	3.0	-5.1207	4.0	-0.9101	2.0	-3.1853	14.0	-5.2772	15.0	18.0	16.0	11.0	16.0	9.0	20.0	13.0	13.0	13.0	17.0	17.0	14.0	18.0	17.0	17.0	21.0	16.0	12.0	13.0	15.3	3.0279400675428794
FBgn0000261	CG6871	Catalase	Cat	89.0	0.0195	67.0	1.02	51.0	0.3608	6.0	-1.5132	38.0	0.7658	251.0	0.5881
FBgn0000273	CG4379	Protein kinase, cAMP-dependent, catalytic subunit 1	Pka-C1	59.0	-1.4464	9.0	-3.0884	4.0	-2.4657	3.0	-1.7654	6.0	-0.6425	81.0	-4.3614	168.0	1.4053	41.0	-0.0066	21.0	-0.673	8.0	-1.9172	2.0	-2.2124	240.0	0.325	20.0	21.0	21.0	19.0	20.0	20.0	23.0	19.0	20.0	19.0	21.0	20.0	24.0	24.0	23.0	22.0	22.0	18.0	19.0	21.0	20.8	1.7350868323485926
FBgn0000274	CG12066	Protein kinase, cAMP-dependent, catalytic subunit 2	Pka-C2	72.0	0.692	94.0	1.538	44.0	-0.5031	28.0	0.0614	17.0	-0.6359	255.0	1.7255	169.0	1.4292	61.0	0.6583	24.0	-0.5153	8.0	-1.9172	33.0	2.2998	295.0	2.149	20.0	19.0	18.0	19.0	18.0	18.0	19.0	19.0	19.0	19.0	21.0	18.0	20.0	17.0	19.0	18.0	20.0	18.0	19.0	19.0	18.85	0.9333020044867296
FBgn0000352	CG1708	costa	cos	0.0	-4.3294	0.0	-3.7259	0.0	-2.7062	0.0	-2.0176	0.0	-0.9066	0.0	-6.7197	0.0	-2.6099	0.0	-1.3698	0.0	-1.7772	0.0	-2.6546	0.0	-2.5036	0.0	-7.6344	0.0	0.0	0.0	0.0	0.0	0.0	0.0	0.0	0.0	0.0	0.0	0.0	0.0	0.0	0.0	0.0	0.0	0.0	0.0	0.0	0.0	0.0
FBgn0000382	CG3954	corkscrew	csw	88.0	1.083	75.0	0.729	6.0	-1.3646	14.0	-0.0357	45.0	0.8937	228.0	0.6138
FBgn0000405	CG3510	Cyclin B	CycB	91.0	1.3368	69.0	0.5682	21.0	-0.6065	7.0	-0.6611	40.0	0.4875	228.0	0.6138
FBgn0000463	CG3619	Delta	Dl	120.0	3.7904	82.0	0.9166	31.0	-0.1011	37.0	2.019	24.0	-0.8124	294.0	2.3304	121.0	2.8615	88.0	3.4174	67.0	6.919	37.0	1.5655	31.0	3.8144	344.0	4.6535	17.0	16.0	18.0	19.0	17.0	18.0	18.0	25.0	19.0	18.0	16.0	21.0	18.0	16.0	20.0	17.0	18.0	19.0	26.0	20.0	18.8	2.6675437154214006
FBgn0000489	CG6117	Protein kinase, cAMP-dependent, catalytic subunit 3	Pka-C3	111.0	3.0289	69.0	0.5682	3.0	-1.5162	37.0	2.019	19.0	-1.2187	239.0	0.8999
FBgn0000490	CG9885	decapentaplegic	dpp	83.0	1.0614	63.0	0.5321	19.0	-1.7125	19.0	-0.491	13.0	-1.0333	197.0	-0.1917
FBgn0000499	CG18361	dishevelled	dsh	136.0	2.8417	17.0	-0.9605	65.0	0.5128	24.0	-0.1841	25.0	0.159	267.0	2.1222	148.0	0.9273	41.0	-0.0066	20.0	-0.7256	23.0	-0.5346	24.0	0.9898	256.0	0.8556	21.0	23.0	20.0	21.0	21.0	19.0	15.0	18.0	19.0	21.0	18.0	22.0	20.0	19.0	19.0	20.0	18.0	17.0	18.0	14.0	19.15	2.2070461326349626
FBgn0000524	CG3929	deltex	dx	79.0	0.3215	67.0	0.5146	2.0	-1.5667	3.0	-1.0184	46.0	0.9749	197.0	-0.1925
FBgn0000533	CG4920	easter	ea	73.0	-0.1861	71.0	0.6218	30.0	-0.1516	20.0	0.5003	18.0	-1.2999	212.0	0.1977
FBgn0000547	CG12676	echinoid	ed	0.0	-8.974	1.0	-9.0776	64.0	3.9752	84.0	12.989	86.0	8.802	235.0	1.917	33.0	-0.9115	31.0	-2.09	31.0	-1.2716	30.0	0.8108	33.0	-0.193	158.0	-1.8771	21.0	17.0	20.0	22.0	19.0	22.0	23.0	22.0	21.0	18.0	17.0	20.0	21.0	20.0	19.0	20.0	21.0	22.0	20.0	21.0	20.3	1.6575187543592473
FBgn0000575	CG1007	extra macrochaetae	emc	84.0	0.7445	86.0	1.0238	9.0	-1.213	27.0	1.1256	33.0	-0.0812	239.0	0.8999
FBgn0000591	CG8365	Enhancer of split m8, helix-loop-helix	E(spl)m8-HLH	52.0	-1.9629	51.0	0.0858	44.0	0.5559	10.0	-0.3931	38.0	0.325	195.0	-0.2445
FBgn0000606	CG2328	even skipped	eve	74.0	-0.7134	88.0	2.5076	54.0	0.5412	3.0	-1.7654	37.0	0.7218	256.0	0.7337
FBgn0000658	CG10917	four-jointed	fj	60.0	0.2889	58.0	0.3699	34.0	-0.9869	30.0	0.1841	29.0	0.5564	211.0	0.2711
FBgn0000808	CG1505	gastrulation-defective	gd	140.0	-0.3382	55.0	0.2594	27.0	0.3186	29.0	1.9817	23.0	2.4786	274.0	0.8175
FBgn0001075	CG3352	fat	ft	32.0	-3.655	60.0	0.327	38.0	0.2527	15.0	0.0536	25.0	-0.7312	170.0	-0.8947
FBgn0001079	CG6551	fused	fu	64.0	-1.2021	49.0	-0.255	35.0	-0.6014	3.0	-1.7654	27.0	0.2817	178.0	-1.5373	160.0	3.186	65.0	0.3151	39.0	0.0757	18.0	-0.4529	25.0	-0.2804	307.0	1.5854	21.0	19.0	20.0	18.0	19.0	19.0	19.0	21.0	22.0	21.0	20.0	24.0	19.0	21.0	19.0	19.0	21.0	20.0	22.0	20.0	20.2	1.4363696929192156
FBgn0001085	CG17697	frizzled	fz	89.0	1.263	52.0	0.1752	39.0	-0.745	20.0	-0.4296	19.0	-0.4372	219.0	0.5355
FBgn0001122	CG2204	G protein alpha o subunit	Galphao	39.0	-2.4237	46.0	-0.4675	38.0	-0.421	19.0	-0.4203	11.0	-0.4225	153.0	-2.2651	181.0	1.716	51.0	0.3258	23.0	-0.5679	27.0	-0.1659	20.0	0.4076	302.0	2.3812	21.0	19.0	18.0	19.0	19.0	20.0	19.0	23.0	20.0	19.0	21.0	20.0	19.0	18.0	20.0	19.0	21.0	19.0	22.0	20.0	19.8	1.281446551034375
FBgn0001137	CG17610	gurken	grk	64.0	0.4232	70.0	0.7593	32.0	-1.0836	37.0	0.6137	37.0	1.3512	240.0	1.2297	214.0	2.5047	63.0	0.7248	39.0	0.2734	30.0	0.1106	33.0	2.2998	379.0	4.9348	19.0	18.0	19.0	18.0	17.0	19.0	20.0	20.0	17.0	20.0	17.0	19.0	18.0	20.0	21.0	18.0	19.0	21.0	19.0	19.0	18.9	1.2096106376585984
FBgn0001139	CG8384	groucho	gro	76.0	-0.6157	36.0	-1.1759	34.0	-0.6615	4.0	-1.6813	35.0	0.6337	185.0	-1.3335	1.0	-2.586	0.0	-1.3698	0.0	-1.7772	0.0	-2.6546	0.0	-2.5036	1.0	-7.6012	13.0	12.0	22.0	22.0	5.0	10.0	12.0	10.0	19.0	21.0	20.0	20.0	10.0	12.0	11.0	9.0	22.0	21.0	8.0	11.0	14.5	5.633546139445666
FBgn0001169	CG5460	Hairless	H	6.0	-5.8547	30.0	-0.4771	7.0	-1.314	8.0	-0.5717	8.0	-2.1124	59.0	-3.7817	2.0	-3.0148	41.0	-0.6763	37.0	0.5847	24.0	0.4974	26.0	0.5861	130.0	-1.5234	19.0	19.0	18.0	23.0	20.0	22.0	26.0	22.0	21.0	28.0	26.0	23.0	28.0	24.0	24.0	26.0	21.0	27.0	22.0	25.0	23.2	3.036618618064993
FBgn0001235	CG17117	homothorax	hth	120.0	2.3043	89.0	1.3758	33.0	-1.0353	30.0	0.1841	35.0	1.1525	307.0	3.4444	106.0	1.6475	61.0	1.1271	31.0	0.0835	28.0	0.9948	33.0	1.7582	259.0	1.7383	13.0	10.0	6.0	10.0	12.0	10.0	14.0	16.0	12.0	9.0	14.0	18.0	12.0	15.0	18.0	12.0	10.0	13.0	11.0	11.0	12.3	2.9753372210469475
FBgn0001291	CG2275	Jun-related antigen	Jra	46.0	-2.0816	28.0	-1.7425	26.0	-1.1426	3.0	-1.7654	25.0	0.1936	128.0	-2.993	176.0	1.5965	32.0	-0.3059	28.0	-0.305	31.0	0.2028	19.0	0.262	286.0	1.8506	19.0	18.0	18.0	19.0	21.0	23.0	22.0	21.0	19.0	22.0	23.0	21.0	23.0	21.0	24.0	20.0	22.0	19.0	20.0	20.0	20.75	1.7733405882980466
FBgn0001297	CG33956	kayak	kay	96.0	1.4981	50.0	0.1103	15.0	-1.906	27.0	0.0	21.0	-0.2385	209.0	0.2049
FBgn0001624	CG1725	discs large 1	dlg1	0.0	-6.3624	0.0	-1.2811	0.0	-1.6678	0.0	-1.2864	0.0	-2.7623	0.0	-5.3162	0.0	-5.5728	0.0	-2.9882	0.0	-3.6144	2.0	-1.6607	0.0	-2.0329	2.0	-7.1747	0.0	0.0	0.0	0.0	0.0	0.0	0.0	0.0	0.0	0.0	0.0	0.0	0.0	0.0	0.0	0.0	0.0	0.0	0.0	0.0	0.0	0.0
FBgn0001965	CG7793	Son of sevenless	Sos	1.0	-6.2778	3.0	-1.2007	1.0	-1.6173	0.0	-1.2864	0.0	-2.7623	5.0	-5.1861	4.0	-5.3538	8.0	-2.5816	0.0	-3.6144	1.0	-1.7362	0.0	-2.0329	13.0	-6.8588	12.0	11.0	9.0	13.0	13.0	13.0	14.0	14.0	10.0	13.0	15.0	17.0	14.0	13.0	15.0	14.0	12.0	10.0	13.0	15.0	13.0	1.9466570535691508
FBgn0001990	CG4148	weckle	wek	91.0	0.1173	58.0	0.3825	5.0	-2.4055	16.0	-0.6725	58.0	1.646	228.0	-0.0815
FBgn0002121	CG2671	lethal (2) giant larvae	l(2)gl	135.0	9.2501	56.0	-2.5365	32.0	1.2107	33.0	-1.8625	29.0	-0.6319	285.0	1.333	174.0	4.5483	49.0	0.5047	31.0	2.7386	30.0	2.0488	20.0	-0.7829	304.0	5.6182	22.0	24.0	18.0	20.0	19.0	21.0	21.0	20.0	21.0	19.0	19.0	21.0	19.0	21.0	23.0	21.0	19.0	17.0	18.0	18.0	20.05	1.79105966869954
FBgn0002174	CG5504	-	CG5504	24.0	-0.9204	46.0	-0.0195	55.0	0.029	8.0	-1.1661	14.0	-0.9339	147.0	-1.8445	41.0	-1.63	14.0	-0.9043	45.0	0.5889	3.0	-2.3781	3.0	-2.0669	106.0	-4.119	13.0	14.0	14.0	12.0	10.0	9.0	11.0	12.0	17.0	16.0	18.0	17.0	18.0	20.0	17.0	16.0	12.0	16.0	13.0	12.0	14.35	3.013565819319104
FBgn0002413	CG2048	discs overgrown	dco	31.0	-2.8146	66.0	0.9492	25.0	-1.2028	21.0	-0.2522	15.0	-0.2465	158.0	-2.1196	104.0	0.1204	70.0	0.5692	41.0	0.2649	22.0	-0.151	38.0	0.6309	275.0	0.6663	21.0	22.0	23.0	19.0	21.0	19.0	24.0	22.0	22.0	21.0	22.0	18.0	19.0	23.0	21.0	23.0	22.0	19.0	25.0	22.0	21.4	1.8467610337532783
FBgn0002592	CG6104	Enhancer of split m2, Bearded family member	E(spl)m2-BFM	25.0	-0.9201	5.0	-2.6049	4.0	-1.3096	15.0	0.178	12.0	-0.9424	61.0	-2.9308	17.0	-1.243	42.0	-1.4601	18.0	-3.0587	13.0	-0.3144	3.0	-3.0887	93.0	-3.4119	1.0	1.0	20.0	20.0	19.0	9.0	18.0	19.0	18.0	19.0	20.0	18.0	17.0	17.0	19.0	20.0	19.0	20.0	17.0	18.0	16.45	5.799047108656822
FBgn0002609	CG8346	Enhancer of split m3, helix-loop-helix	E(spl)m3-HLH	77.0	0.1523	7.0	-1.0935	33.0	0.0	38.0	2.1083	26.0	-0.65	181.0	-0.6086
FBgn0002629	CG6099	Enhancer of split m4, Bearded family member	E(spl)m4-BFM	41.0	-2.326	34.0	-1.3175	32.0	-0.7818	1.0	-1.9335	19.0	-0.0704	127.0	-3.0221	84.0	0.8176	51.0	-0.216	15.0	-1.6068	34.0	1.2644	27.0	2.8237	211.0	0.7804	22.0	21.0	20.0	22.0	20.0	22.0	20.0	22.0	21.0	20.0	22.0	20.0	18.0	20.0	19.0	20.0	21.0	20.0	21.0	21.0	20.6	1.0954451150103324
FBgn0002632	CG8354	Enhancer of split m6, Bearded family member	E(spl)m6-BFM	116.0	3.4482	50.0	1.6664	11.0	-1.7499	4.0	-3.9901	34.0	2.3373	215.0	1.0376	55.0	-0.4558	65.0	-0.1431	21.0	-2.6463	43.0	1.6713	47.0	1.1583	231.0	-0.1535	21.0	21.0	20.0	21.0	22.0	23.0	22.0	21.0	21.0	19.0	22.0	22.0	22.0	21.0	20.0	18.0	21.0	19.0	20.0	23.0	20.95	1.3168942730211068
FBgn0002643	CG8118	mastermind	mam	62.0	-1.2998	56.0	0.2408	38.0	-0.421	1.0	-1.9335	2.0	-0.8186	159.0	-2.0904	125.0	0.9944	50.0	-1.002	68.0	3.8148	35.0	1.1418	25.0	-0.9652	303.0	1.5466	7.0	4.0	2.0	14.0	19.0	19.0	18.0	16.0	16.0	15.0	11.0	13.0	14.0	17.0	16.0	17.0	18.0	17.0	14.0	17.0	14.2	4.774934554525329
FBgn0002732	CG8337	Enhancer of split malpha, Bearded family member	E(spl)malpha-BFM	77.0	0.9201	0.0	-2.8554	83.0	4.1355	34.0	4.4054	33.0	1.3065	227.0	1.7027	194.0	2.4239	62.0	-0.3149	17.0	-3.1961	56.0	2.5318	18.0	-1.6409	347.0	2.5855	21.0	20.0	17.0	23.0	21.0	22.0	18.0	20.0	19.0	21.0	20.0	22.0	19.0	20.0	20.0	21.0	21.0	23.0	19.0	21.0	20.4	1.5355437918998291
FBgn0002734	CG8328	Enhancer of split mdelta, helix-loop-helix	E(spl)mdelta-HLH	69.0	-0.9578	45.0	-0.5383	2.0	-2.586	32.0	0.6725	12.0	-0.3785	160.0	-2.0613	69.0	-0.011	44.0	-0.9034	14.0	-1.7707	20.0	-0.1405	11.0	-1.1394	158.0	-0.763	19.0	19.0	23.0	20.0	21.0	18.0	22.0	22.0	23.0	25.0	24.0	23.0	22.0	19.0	24.0	26.0	22.0	21.0	21.0	22.0	21.8	2.117595458607661
FBgn0002735	CG8333	Enhancer of split mgamma, helix-loop-helix	E(spl)mgamma-HLH	120.0	1.5344	56.0	0.2408	37.0	-0.4811	26.0	0.1681	19.0	-0.0704	258.0	0.7919
FBgn0002736	CG9401	mago nashi	mago	64.0	-0.9476	80.0	0.863	46.0	0.657	28.0	1.215	27.0	-0.5687	245.0	1.056	127.0	2.5889	50.0	0.1353	21.0	-0.7517	16.0	-0.4974	20.0	-0.4186	234.0	1.1062	23.0	19.0	19.0	20.0	18.0	20.0	21.0	21.0	23.0	22.0	21.0	19.0	23.0	20.0	19.0	22.0	20.0	20.0	24.0	18.0	20.6	1.7591864148251204
FBgn0002926	CG10129	nudel	ndl	80.0	1.0263	48.0	-0.4508	23.0	0.0	18.0	0.8455	31.0	1.0923	200.0	0.949
FBgn0002930	CG1857	necrotic	nec	152.0	3.5742	66.0	0.4508	1.0	-1.5163	51.0	8.1879	3.0	-1.9062	273.0	2.9867	1.0	-1.5745	87.0	1.1166	96.0	7.6639	1.0	-1.1087	20.0	-1.4479	205.0	-0.7674	18.0	18.0	19.0	18.0	18.0	17.0	20.0	20.0	21.0	22.0	18.0	19.0	19.0	19.0	19.0	20.0	18.0	15.0	19.0	18.0	18.75	1.4823523268955434
FBgn0002945	CG11614	naked cuticle	nkd	131.0	2.8311	78.0	1.052	41.0	1.2406	23.0	1.958	60.0	4.1979	333.0	4.6614
FBgn0002973	CG3779	numb	numb	0.0	-6.3624	0.0	-1.2811	0.0	-1.6678	0.0	-1.2864	0.0	-2.7623	0.0	-5.3162	106.0	2.0329	25.0	-2.7692	17.0	-1.2789	15.0	-0.6423	13.0	-0.644	176.0	-0.2388	19.0	21.0	20.0	19.0	21.0	19.0	20.0	20.0	20.0	21.0	20.0	21.0	20.0	21.0	19.0	20.0	21.0	20.0	21.0	20.0	20.15	0.7451598203705947
FBgn0003002	CG1133	odd paired	opa	124.0	2.4386	59.0	0.4024	41.0	-0.6482	46.0	1.1661	21.0	-0.2385	291.0	2.9155	191.0	6.7284	64.0	1.0606	42.0	2.8201	38.0	1.6658	16.0	0.0991	351.0	4.8574	19.5	19.0	18.5	19.5	20.0	20.0	16.5	18.0	18.0	19.0	19.0	19.5	19.0	20.5	21.0	20.0	17.5	19.0	21.0	20.5	19.25	1.7650452162436558
FBgn0003048	CG3443	pecanex	pcx	125.0	4.2134	43.0	-0.1286	4.0	-1.4657	37.0	2.019	11.0	-1.8686	220.0	0.4057
FBgn0003067	CG17725	Phosphoenolpyruvate carboxykinase 1	Pepck1	75.0	0.8493	70.0	0.6512	26.0	0.2068	22.0	1.7355	3.0	-1.9062	196.0	0.8374
FBgn0003079	CG2845	Raf oncogene	Raf	164.0	7.513	58.0	0.2734	25.0	-0.4043	56.0	3.7164	9.0	-2.0311	312.0	2.7985	167.0	3.5692	63.0	0.2134	50.0	1.1165	29.0	0.3774	35.0	0.4206	344.0	2.6482	23.0	24.0	23.0	23.0	23.0	20.0	18.0	21.0	20.0	21.0	26.0	21.0	24.0	23.0	22.0	24.0	19.0	21.0	24.0	26.0	22.3	2.1545545393788235
FBgn0003089	CG9614	pipe	pip	2.0	-6.1932	136.0	2.3638	36.0	0.1516	3.0	-1.0184	42.0	0.65	219.0	0.3797
FBgn0003090	CG11084	prickle	pk	0.0	-1.7265	0.0	-1.5121	0.0	-2.6317	0.0	-1.657	0.0	-2.3249	0.0	-6.7036	0.0	-2.6099	0.0	-1.3698	0.0	-1.7772	0.0	-2.6546	0.0	-2.5036	0.0	-7.6344	0.0	0.0	0.0	0.0	0.0	0.0	0.0	0.0	0.0	0.0	0.0	0.0	0.0	0.0	0.0	0.0	0.0	0.0	0.0	0.0	0.0	0.0
FBgn0003091	CG6622	Protein C kinase 53E	Pkc53E	98.0	0.4593	72.0	1.3742	29.0	-0.9622	31.0	0.5885	31.0	0.4577	261.0	0.8793
FBgn0003118	CG17077	pointed	pnt	0.0	-8.974	2.0	-8.8583	16.0	-1.2098	54.0	6.6218	11.0	-0.5222	83.0	-4.766	113.0	1.9613	66.0	1.5779	31.0	0.0835	36.0	1.9897	29.0	1.0884	275.0	2.1428	22.0	18.0	18.0	22.0	20.0	20.0	22.0	23.0	24.0	20.0	25.0	20.0	21.0	17.0	21.0	21.0	22.0	23.0	25.0	21.0	21.25	2.1734038305216807
FBgn0003124	CG12306	polo	polo	0.0	-2.175	0.0	-1.3651	0.0	-1.1766	0.0	-1.5788	0.0	-1.9905	0.0	-7.8519	0.0	-7.8174	0.0	-3.617	0.0	-14.2408	0.0	-1.1862	0.0	-2.5723	0.0	-14.4161	0.0	0.0	0.0	0.0	0.0	0.0	0.0	0.0	0.0	0.0	0.0	0.0	0.0	0.0	0.0	0.0	0.0	0.0	0.0	0.0	0.0	0.0
FBgn0003169	CG7904	punt	put	65.0	-1.1532	82.0	2.0825	33.0	-0.7217	21.0	-0.2522	30.0	0.4137	231.0	0.0058
FBgn0003204	CG1799	raspberry	ras	63.0	-1.2509	28.0	-1.7425	39.0	-0.3608	17.0	-0.5885	30.0	0.4137	177.0	-1.5664	134.0	0.5927	68.0	0.891	32.0	-0.0946	24.0	-0.4424	16.0	-0.1747	274.0	1.4526	15.0	15.0	15.0	18.0	16.0	17.0	16.0	13.0	15.0	15.0	19.0	13.0	16.0	14.0	17.0	14.0	16.0	15.0	17.0	15.0	15.55	1.538112308540638
FBgn0003205	CG9375	Ras oncogene at 85D	Ras85D	114.0	1.2412	58.0	0.3825	48.0	0.1804	37.0	1.0929	12.0	-0.3785	269.0	1.1122	213.0	2.4808	63.0	0.7248	38.0	0.2208	35.0	0.5715	35.0	2.5909	384.0	5.1007	23.0	19.0	22.0	24.0	19.0	26.0	20.0	22.0	24.0	21.0	20.0	24.0	20.0	18.0	24.0	22.0	22.0	22.0	20.0	24.0	21.8	2.142305693455191
FBgn0003256	CG12559	rolled	rl	31.0	-0.6852	38.0	-0.2791	29.0	-1.2288	7.0	-1.2274	4.0	-1.9275	109.0	-3.1006	64.0	-1.0803	35.0	-0.2061	18.0	-0.8308	10.0	-1.7329	1.0	-2.358	128.0	-3.3894	19.0	23.0	19.0	15.0	22.0	20.0	14.0	20.0	19.0	21.0	21.0	18.0	19.0	17.0	15.0	17.0	19.0	19.0	18.0	20.0	18.75	2.314144152358434
FBgn0003295	CG1214	roughoid	ru	85.0	0.1285	79.0	8.0251	53.0	2.787	16.0	-1.4432	35.0	2.4616	268.0	3.3679	84.0	0.145	80.0	0.7157	46.0	0.7904	33.0	1.0094	33.0	-0.193	276.0	0.9091	22.0	22.0	21.0	20.0	19.0	19.0	21.0	21.0	21.0	20.0	21.0	22.0	21.0	21.0	20.0	20.0	21.0	22.0	21.0	19.0	20.7	0.9787209698591859
FBgn0003310	CG4385	Star	S	129.0	1.9741	60.0	0.5242	21.0	-1.4433	6.0	-1.5132	39.0	0.8098	255.0	0.7046
FBgn0003317	CG1891	saxophone	sax	136.0	2.3162	58.0	0.3825	15.0	-1.8042	46.0	1.8495	24.0	0.1496	279.0	1.4033
FBgn0003345	CG8544	scalloped	sd	51.0	-2.0475	22.0	-0.6915	1.0	-1.6173	11.0	-0.3037	7.0	-2.1936	92.0	-2.9234	56.0	-2.5072	25.0	-1.7177	19.0	-1.8167	12.0	-0.9058	6.0	-1.6123	118.0	-3.843	18.0	21.0	23.0	23.0	21.0	22.0	21.0	20.0	20.0	21.0	19.0	20.0	20.0	20.0	19.0	21.0	22.0	21.0	23.0	20.0	20.75	1.3717065820970678
FBgn0003366	CG18085	sevenless	sev	73.0	0.7255	62.0	0.4997	41.0	-0.6482	24.0	-0.1841	37.0	1.3512	237.0	1.1305	194.0	2.0267	57.0	0.5253	43.0	0.4837	28.0	-0.0737	30.0	1.8631	352.0	4.0394	20.0	19.0	19.0	14.0	18.0	18.0	19.0	24.0	22.0	18.0	21.0	17.0	20.0	17.0	21.0	19.0	18.0	16.0	21.0	19.0	19.0	2.2242680641174144
FBgn0003371	CG2621	shaggy	sgg	87.0	-0.0782	76.0	1.6575	10.0	-2.1048	47.0	1.9335	32.0	0.5017	252.0	0.6172
FBgn0003390	CG3135	shifted	shf	53.0	-1.8783	95.0	1.265	26.0	-0.3538	36.0	1.9296	26.0	-0.65	236.0	0.8219
FBgn0003396	CG7734	schnurri	shn	66.0	-1.1043	104.0	3.6409	2.0	-2.586	73.0	4.1192	20.0	-0.0264	265.0	0.9957	82.0	0.7071	43.0	-1.0016	25.0	0.0328	28.0	0.6623	28.0	3.0713	206.0	0.6348	24.0	23.0	22.0	22.5	23.5	21.5	22.5	20.5	22.0	19.0	25.5	20.5	22.5	21.5	24.0	24.0	26.0	24.0	21.0	27.0	22.558823529411764	2.376541623689045
FBgn0003410	CG9949	seven in absentia	sina	183.0	1.0146	58.0	0.467	33.0	0.9558	19.0	0.3303	33.0	4.3145	326.0	2.7947	131.0	2.7682	54.0	0.4959	38.0	0.6682	30.0	1.2435	24.0	0.2512	277.0	2.1934	20.0	18.0	18.0	20.0	19.0	22.0	20.0	19.0	19.0	20.0	20.0	21.0	21.0	22.0	21.0	19.0	18.0	18.0	21.0	20.0	19.8	1.281446551034375
FBgn0003430	CG16738	sloppy paired 1	slp1	138.0	2.9089	53.0	0.2077	83.0	1.3836	39.0	0.7365	45.0	2.1461	358.0	5.1302	180.0	1.6921	29.0	-0.4056	49.0	0.7992	5.0	-2.1938	25.0	1.1353	288.0	1.9169	20.0	21.0	22.0	21.0	21.0	24.0	22.0	25.0	22.0	18.0	22.0	21.0	21.0	18.0	24.0	22.0	23.0	19.0	20.0	18.0	21.2	1.9894458366193604
FBgn0003444	CG11561	smoothened	smo	14.0	-7.4748	7.0	-7.762	25.0	-0.2376	33.0	2.1648	14.0	-0.1492	93.0	-4.3264	81.0	0.0829	68.0	0.0286	17.0	-3.1961	40.0	1.4727	22.0	-1.2548	228.0	-0.2243	18.0	19.0	16.0	15.0	14.0	15.0	4.0	13.0	18.0	15.0	15.0	21.0	23.0	21.0	18.0	17.0	16.0	17.0	16.0	15.0	16.3	3.8539112053792017
FBgn0003450	CG7996	snake	snk	68.0	-0.6092	4.0	-1.1739	3.0	-1.5162	6.0	-0.7504	62.0	2.2748	143.0	-1.5969	105.0	0.1752	50.0	-0.4472	46.0	0.738	29.0	0.3774	34.0	0.3505	264.0	0.3504	21.0	22.0	23.0	20.0	21.0	22.0	21.0	23.0	20.0	22.0	22.0	19.0	22.0	22.0	20.0	22.0	19.0	22.0	25.0	21.0	21.45	1.4317821063276355
FBgn0003463	CG9224	short gastrulation	sog	103.0	1.8402	65.0	0.4008	19.0	-0.2757	24.0	2.1805	23.0	0.2356	234.0	1.8981	59.0	-0.5635	61.0	0.766	27.0	0.3607	37.0	1.5655	17.0	0.3468	201.0	0.4892	17.5	18.0	20.0	19.5	20.0	20.5	19.0	18.0	17.5	18.5	17.5	18.5	19.5	18.0	21.0	20.0	19.0	21.5	16.5	19.5	18.975	1.6090688500193413
FBgn0003495	CG6134	spatzle	spz	96.0	1.3065	58.0	3.4205	33.0	0.6265	17.0	-1.231	10.0	-0.6465	214.0	0.9937
FBgn0003502	CG8049	Btk family kinase at 29A	Btk29A	75.0	-0.0169	75.0	0.729	22.0	-0.5559	28.0	1.215	18.0	-1.2999	218.0	0.3537
FBgn0003507	CG3992	serpent	srp	14.0	-3.6453	15.0	-2.6634	26.0	-1.1426	9.0	-1.261	14.0	-0.2905	78.0	-4.4487	32.0	-1.8451	38.0	-0.1064	14.0	-1.0411	8.0	-1.9172	30.0	1.8631	122.0	-3.5884	21.0	23.0	24.0	21.0	22.0	21.0	26.0	21.0	22.0	21.0	20.0	21.0	21.0	20.0	22.0	21.0	20.0	23.0	24.0	22.0	21.8	1.542383664469075
FBgn0003557	CG4244	Suppressor of deltex	Su(dx)	80.0	-0.4202	64.0	0.8075	51.0	0.3608	38.0	1.1769	14.0	-0.2905	247.0	0.4717
FBgn0003612	CG8068	Suppressor of variegation 2-10	Su(var)2-10	0.0	-6.3624	0.0	-1.2811	0.0	-1.6678	0.0	-1.2864	1.0	-2.6811	1.0	-5.2902	0.0	-5.5728	0.0	-2.9882	0.0	-3.6144	0.0	-1.8116	0.0	-2.0329	0.0	-7.2322	0.0	0.0	0.0	0.0	0.0	0.0	0.0	0.0	0.0	0.0	0.0	0.0	0.0	0.0	0.0	0.0	0.0	0.0	0.0	0.0	0.0	0.0
FBgn0003716	CG14026	thickveins	tkv	118.0	2.2371	61.0	0.4672	50.0	-0.2129	54.0	1.657	46.0	2.2455	329.0	4.1716	112.0	0.7251	65.0	-0.1431	40.0	-0.0344	26.0	0.5461	26.0	-0.8687	269.0	0.7438	19.0	20.0	21.0	21.0	21.0	19.0	21.0	19.0	20.0	21.0	19.0	18.0	18.0	19.0	18.0	22.0	19.0	26.0	19.0	19.0	19.95	1.848897253129978
FBgn0003719	CG6868	tolloid	tld	75.0	-0.6646	64.0	0.8075	39.0	-0.3608	17.0	-0.5885	48.0	1.2059	243.0	0.3552
FBgn0003720	CG1378	tailless	tll	58.0	-1.4953	60.0	0.5242	67.0	1.323	10.0	-1.1769	26.0	0.2377	221.0	-0.2853
FBgn0003731	CG10079	Epidermal growth factor receptor	Egfr	75.0	0.7695	37.0	0.1938	22.0	-0.5262	15.0	-0.5216	5.0	-1.6609	154.0	-1.1416	122.0	0.8528	55.0	1.0094	21.0	-2.7386	11.0	0.0	3.0	-2.3039	212.0	-0.4448	20.0	20.0	20.5	19.0	19.5	19.5	20.0	20.5	21.5	19.5	19.5	21.0	20.0	20.0	21.5	20.0	20.0	19.5	21.5	19.0	20.1	1.3165611772087664
FBgn0003733	CG1389	torso	tor	110.0	1.9684	73.0	0.8566	39.0	-0.745	26.0	-0.0614	19.0	-0.4372	267.0	2.1222	157.0	1.1424	70.0	0.9575	25.0	-0.4627	22.0	-0.6268	12.0	-0.7569	286.0	1.8506	21.0	21.0	20.0	18.0	21.0	22.0	20.0	21.0	19.0	19.0	19.0	21.0	19.0	19.0	20.0	21.0	20.0	21.0	19.0	18.0	19.95	1.145931016569864
FBgn0003865	CG1502	twisted gastrulation	tsg	97.0	1.4136	50.0	1.6664	4.0	-2.5061	1.0	-4.6268	23.0	0.9697	175.0	-0.7211
FBgn0003866	CG1374	teashirt	tsh	126.0	4.298	95.0	1.265	33.0	0.0	27.0	1.1256	25.0	-0.7312	306.0	2.6425	133.0	1.708	54.0	-0.2439	32.0	-0.5866	10.0	-1.0568	26.0	-0.2103	255.0	0.0919	23.0	21.0	19.0	14.0	19.0	21.0	21.0	21.0	23.0	21.0	23.0	22.0	26.0	22.0	22.0	23.0	23.0	21.0	24.0	23.0	21.6	2.4148662379867796
FBgn0003867	CG6705	torso-like	tsl	79.0	0.9909	62.0	0.2505	18.0	-0.3446	39.0	5.5179	9.0	-1.2636	207.0	1.1444	103.0	0.5386	114.0	2.6626	52.0	1.6153	43.0	1.6713	25.0	-0.9652	337.0	2.3494	23.0	25.0	24.0	25.0	22.0	25.0	21.0	20.0	21.0	21.0	25.0	26.0	23.0	24.0	24.0	25.0	20.0	22.0	23.0	24.0	23.15	1.8431951662948318
FBgn0003882	CG10520	tube	tub	191.0	1.4951	67.0	0.3528	62.0	1.123	4.0	-3.3593	41.0	1.6371	365.0	0.9191
FBgn0003892	CG2411	patched	ptc	0.0	-6.3624	0.0	-1.2811	0.0	-1.6678	0.0	-1.2864	0.0	-2.7623	0.0	-5.3162	0.0	-5.5728	0.0	-2.9882	0.0	-3.6144	1.0	-1.7362	0.0	-2.0329	1.0	-7.2034	1.0	1.0	1.0	1.0	1.0	1.0	1.0	1.0	1.0	1.0	1.0	1.0	1.0	1.0	1.0	1.0	1.0	1.0	1.0	1.0	1.0	0.0
FBgn0003984	CG10491	vein	vn	94.0	1.5217	97.0	2.0038	2.0	-1.4474	18.0	0.8455	32.0	1.1994	243.0	2.1493	136.0	1.2223	66.0	-0.0859	54.0	1.8902	27.0	0.6123	12.0	-2.22	295.0	1.3577	15.0	17.0	17.0	18.0	14.0	16.0	17.0	17.0	18.0	17.0	19.0	17.0	15.0	16.0	11.0	17.0	16.0	16.0	15.0	18.0	16.3	1.750187959830841
FBgn0004003	CG7225	windbeutel	wbl	27.0	-0.8493	41.0	-0.8015	5.0	-1.2406	9.0	-1.157	2.0	-2.0133	84.0	-2.2888	109.0	0.6629	106.0	2.2045	50.0	1.3403	46.0	1.8699	18.0	-1.6409	329.0	2.1605	19.0	20.0	21.0	19.0	19.0	19.0	17.0	18.0	16.0	18.0	20.0	18.0	17.0	22.0	20.0	18.0	22.0	19.0	22.0	19.0	19.15	1.6944180805158284
FBgn0004107	CG10498	Cyclin-dependent kinase 2	Cdk2	83.0	5.4627	55.0	-2.5747	4.0	-1.0493	35.0	-1.5965	24.0	-1.2901	201.0	-0.6383
FBgn0004110	CG7895	tinman	tin	107.0	0.8991	79.0	1.87	58.0	0.7818	15.0	-0.7566	52.0	1.3819	311.0	2.335	211.0	2.433	96.0	1.8219	42.0	0.4312	46.0	1.5854	36.0	2.7364	431.0	6.6594	18.0	20.0	21.0	22.0	23.0	20.0	20.0	25.0	20.0	21.0	20.0	19.0	20.0	23.0	21.0	20.0	20.0	22.0	23.0	23.0	21.05	1.7006190823220508
FBgn0004132	CG30498	boca	boca	103.0	1.8402	76.0	0.9518	22.0	-0.0689	31.0	3.738	16.0	-0.514	248.0	2.2888	68.0	-0.1865	12.0	-3.1779	34.0	-0.8592	30.0	0.8108	19.0	-1.5444	163.0	-1.7591	18.0	18.0	18.0	20.0	20.0	20.0	20.0	19.0	21.0	19.0	17.0	17.0	19.0	18.0	20.0	20.0	21.0	19.0	18.0	18.0	19.0	1.2139539573337679
FBgn0004177	CG7109	microtubule star	mts	0.0	-4.3294	0.0	-3.7259	0.0	-2.7062	0.0	-2.0176	0.0	-0.9066	0.0	-6.7197	0.0	-3.8227	0.0	-5.2242	0.0	-4.0661	0.0	-2.1475	0.0	-3.8639	0.0	-5.3641	0.0	0.0	0.0	0.0	0.0	0.0	0.0	0.0	0.0	0.0	0.0	0.0	0.0	0.0	0.0	0.0	0.0	0.0	0.0	0.0	0.0	0.0
FBgn0004197	CG6127	Serrate	Ser	68.0	-0.6092	90.0	1.131	40.0	0.3538	26.0	1.0363	20.0	-1.1374	244.0	1.0299	89.0	1.0938	43.0	-1.0016	19.0	-0.9509	35.0	1.3648	17.0	0.3468	203.0	0.5475	21.0	21.0	21.0	18.0	20.0	21.0	23.0	22.0	20.0	20.0	19.0	19.0	18.0	21.0	22.0	24.0	19.0	22.0	18.0	21.0	20.5	1.670171752907624
FBgn0004360	CG1916	Wnt oncogene analog 2	Wnt2	69.0	-0.9578	66.0	0.9492	32.0	-0.7818	25.0	0.0841	14.0	-0.2905	206.0	-0.722
FBgn0004390	CG6721	Ras GTPase activating protein 1	RasGAP1	86.0	-0.127	75.0	1.5867	13.0	-1.9244	33.0	0.7566	28.0	0.3257	235.0	0.1223
FBgn0004567	CG2939	sloppy paired 2	slp2	82.0	0.5753	54.0	0.1662	32.0	-0.0505	5.0	-0.8398	37.0	0.2437	210.0	0.1456
FBgn0004569	CG4531	argos	aos	56.0	-1.593	74.0	1.5159	43.0	-0.1203	29.0	0.4203	23.0	0.1056	225.0	-0.1689
FBgn0004583	CG4114	expanded	ex	53.0	-1.7396	39.0	-0.9634	27.0	-1.0825	4.0	-1.6813	8.0	-0.5545	131.0	-2.9057	75.0	0.3204	38.0	-1.4926	18.0	-1.1149	6.0	-1.5454	3.0	-3.1209	140.0	-1.2871	22.0	20.5	21.5	21.0	20.5	21.5	21.0	22.0	21.5	19.0	23.5	21.5	20.0	20.0	21.5	20.5	23.5	21.5	22.0	22.0	21.325	1.9792189601728507
FBgn0004611	CG4574	Phospholipase C at 21C	Plc21C	68.0	-1.0066	62.0	0.6658	33.0	-0.7217	5.0	-1.5973	29.0	0.3697	197.0	-0.9841
FBgn0004635	CG1004	rhomboid	rho	52.0	-1.7885	61.0	0.595	16.0	-1.744	16.0	-0.6725	23.0	0.1056	168.0	-1.8284	192.0	1.9789	2.0	-1.3033	41.0	0.3786	23.0	-0.5346	52.0	5.0653	310.0	2.6465	19.0	18.0	19.0	20.0	17.0	20.0	16.0	18.0	16.0	18.0	20.0	20.0	17.0	17.0	17.0	17.0	18.0	19.0	17.0	18.0	18.05	1.3168942730211068
FBgn0004638	CG6033	downstream of receptor kinase	drk	64.0	0.4601	44.0	-0.6512	11.0	-0.8271	3.0	-2.492	1.0	-2.1203	123.0	-1.2002	80.0	0.4819	48.0	-0.0451	5.0	-2.0882	7.0	-1.6166	6.0	-2.7628	146.0	-1.1188	19.0	19.0	20.0	19.0	21.0	20.0	15.0	21.0	17.0	20.0	19.0	21.0	21.0	20.0	20.0	22.0	16.0	18.0	20.0	20.0	19.4	1.7591864148251204
FBgn0004644	CG4637	hedgehog	hh	104.0	-1.4708	61.0	0.6746	21.0	-0.3186	19.0	0.3303	34.0	4.4981	239.0	-0.5133
FBgn0004647	CG3936	Notch	N	0.0	-1.7265	0.0	-1.5121	0.0	-2.6317	0.0	-1.657	0.0	-2.3249	0.0	-6.7036	0.0	-1.5952	0.0	-3.865	0.0	-5.5331	0.0	-1.1749	0.0	-3.3783	0.0	-5.6078	0.0	3.0	4.0	4.0	7.0	6.0	5.0	4.0	6.0	7.0	6.0	5.0	4.0	5.0	7.0	5.0	5.0	6.0	4.0	7.0	5.0	1.6858544608470492
FBgn0004784	CG6518	inactivation no afterpotential C	inaC	32.0	-0.6516	74.0	0.8891	51.0	-0.1645	38.0	0.6751	53.0	2.9409	248.0	1.4941	112.0	1.9165	84.0	3.2009	44.0	1.1694	26.0	0.7461	38.0	2.5954	304.0	2.8761	19.0	19.0	18.0	19.0	18.0	21.0	23.0	20.0	17.0	19.0	20.0	19.0	19.0	17.0	20.0	21.0	19.0	20.0	21.0	19.0	19.4	1.429022485182754
FBgn0004837	CG3497	Suppressor of Hairless	Su(H)	79.0	5.1713	34.0	-3.3769	14.0	-0.2421	11.0	-4.7894	15.0	-2.475	153.0	-1.7648	48.0	-1.1711	22.0	-3.0638	27.0	0.3607	9.0	-1.2444	19.0	0.8421	125.0	-1.724	25.0	22.0	14.0	18.0	21.0	25.0	26.0	23.0	23.0	20.0	23.0	22.0	23.0	21.0	24.0	24.0	25.0	24.0	23.0	22.0	22.4	2.7414940221864814
FBgn0004856	CG8264	Bx42	Bx42	0.0	-4.3294	0.0	-3.7259	0.0	-2.7062	0.0	-2.0176	0.0	-0.9066	0.0	-6.7197	0.0	-1.5952	0.0	-3.865	0.0	-5.5331	0.0	-1.1749	0.0	-3.3783	0.0	-5.6078	13.0	15.0	12.0	21.0	12.0	18.0	13.0	11.0	15.0	12.0	12.0	14.0	17.0	14.0	10.0	17.0	14.0	14.0	13.0	10.0	13.85	2.758241239783443
FBgn0004858	CG4220	elbow B	elB	84.0	0.7445	5.0	-1.1471	3.0	-1.5162	40.0	2.287	27.0	-0.5687	159.0	-1.1808	134.0	3.5796	55.0	0.1768	34.0	1.5084	47.0	2.569	45.0	7.282	315.0	3.809	24.0	23.0	22.0	22.0	26.0	21.0	23.0	21.0	27.0	23.0	23.0	22.0	25.0	21.0	24.0	21.0	26.0	25.0	27.0	23.0	23.45	1.9861361590045288
FBgn0004859	CG2125	cubitus interruptus	ci	69.0	-0.5246	44.0	-0.1018	34.0	0.0505	6.0	-0.7504	30.0	-0.325	183.0	-0.5566
FBgn0004864	CG1594	hopscotch	hop	60.0	-1.3975	72.0	1.3742	12.0	-1.9846	18.0	-0.5044	16.0	-0.2024	178.0	-1.5373	126.0	2.5441	46.0	-0.2254	8.0	-1.8376	17.0	-0.3731	25.0	0.4186	222.0	0.8028	21.0	22.0	19.0	18.0	18.0	19.0	18.0	15.0	18.0	21.0	20.0	17.0	18.0	20.0	18.0	19.0	19.0	18.0	19.0	19.0	18.8	1.5423836644690752
FBgn0004889	CG6235	twins	tws	83.0	0.6599	96.0	1.2918	38.0	0.2527	22.0	0.679	36.0	0.1625	275.0	1.8362	136.0	2.9924	78.0	2.6599	28.0	-0.1671	46.0	3.2332	32.0	1.5907	320.0	3.2806	22.0	19.0	20.0	18.0	21.0	18.0	22.0	20.0	24.0	19.0	17.0	17.0	21.0	16.0	25.0	21.0	19.0	23.0	26.0	24.0	20.6	2.81724015754127
FBgn0004907	CG17870	14-3-3zeta	14-3-3zeta	60.0	-2.5487	2.0	-8.8583	80.0	5.7035	16.0	-1.4432	26.0	1.3427	184.0	-0.3254
FBgn0004956	CG5993	unpaired 1	upd1	50.0	-0.0354	106.0	2.4546	34.0	0.7582	29.0	3.293	4.0	-1.7991	223.0	1.591	152.0	1.5538	48.0	-1.1166	75.0	4.777	49.0	2.0684	33.0	-0.193	357.0	2.8216	23.0	25.0	19.0	19.0	21.0	18.0	21.0	22.0	22.0	23.0	22.0	24.0	23.0	20.0	20.0	19.0	24.0	22.0	22.0	24.0	21.65	1.980829172474576
FBgn0004957	CG6205	porcupine	por	56.0	-2.9771	2.0	-8.8583	101.0	7.972	4.0	-3.9901	2.0	-1.641	165.0	-1.1607	90.0	0.2693	77.0	0.544	39.0	-0.1718	34.0	1.0756	52.0	1.6409	292.0	1.2868	23.0	22.0	22.0	20.0	22.0	22.0	23.0	20.0	21.0	24.0	22.0	21.0	21.0	22.0	22.0	22.0	21.0	22.0	23.0	22.0	21.85	0.9880869341680842
FBgn0005198	CG6975	gigas	gig	77.0	0.848	43.0	0.4466	5.0	-1.0288	30.0	0.5357	10.0	-1.3314	165.0	-0.6623
FBgn0005355	CG6054	Suppressor of fused	Su(fu)	172.0	4.5777	86.0	2.2584	36.0	-0.1123	19.0	-0.2396	22.0	-0.5405	335.0	6.7451	144.0	2.4163	60.0	1.43	38.0	6.5727	19.0	0.8627	28.0	-0.0671	289.0	4.6296	21.0	22.0	22.0	24.0	21.0	20.0	20.0	19.0	22.0	19.0	20.0	21.0	23.0	29.0	22.0	20.0	23.0	22.0	22.0	21.0	21.65	2.1830688201896455
FBgn0005590	CG31695	screw	scw	108.0	2.5915	74.0	6.9288	33.0	0.6265	21.0	-0.382	27.0	1.467	263.0	3.1481	69.0	-0.1657	71.0	0.2004	38.0	-0.3093	26.0	0.5461	1.0	-3.2818	205.0	-0.7674	16.0	20.0	20.0	23.0	21.0	18.0	21.0	22.0	22.0	20.0	20.0	21.0	22.0	20.0	22.0	23.0	16.0	17.0	23.0	19.0	20.3	2.178845662513211
FBgn0005672	CG10334	spitz	spi	86.0	1.1622	62.0	0.4997	25.0	-1.4223	17.0	-0.6137	14.0	-0.9339	204.0	0.0397
FBgn0010014	CG4209	Calcineurin B	CanB	97.0	0.4105	60.0	0.5242	37.0	-0.4811	29.0	0.4203	24.0	0.1496	247.0	0.4717
FBgn0010015	CG1455	Calcineurin A1	CanA1	99.0	0.5082	72.0	1.3742	20.0	-1.5035	28.0	0.3363	23.0	0.1056	242.0	0.3261
FBgn0010109	CG8704	deadpan	dpn	2.0	-6.1932	24.0	-0.6379	8.0	-1.2635	10.0	-0.3931	72.0	3.0873	116.0	-2.2992	86.0	0.928	41.0	-1.198	28.0	0.5247	4.0	-1.7461	14.0	-0.3963	173.0	-0.3262	21.0	22.0	22.0	24.0	21.0	19.0	20.0	25.0	19.0	20.0	21.0	21.0	21.0	22.0	22.0	23.0	21.0	20.0	23.0	23.0	21.5	1.5727950313140988
FBgn0010194	CG6407	Wnt oncogene analog 5	Wnt5	73.0	-0.1861	72.0	0.6486	6.0	-1.3646	11.0	-0.3037	46.0	0.9749	208.0	0.0936
FBgn0010213	CG8905	Superoxide dismutase 2 (Mn)	Sod2	81.0	0.4907	108.0	1.6134	60.0	1.3646	25.0	0.947	35.0	0.0812	309.0	2.7205	184.0	4.4998	71.0	0.62	62.0	2.2519	23.0	-0.0755	52.0	1.6123	392.0	4.0268	24.0	24.0	22.0	19.0	18.0	23.0	21.0	23.0	19.0	22.0	19.0	21.0	22.0	21.0	21.0	19.0	22.0	19.0	18.0	22.0	20.95	1.9049796241485237
FBgn0010269	CG15793	Downstream of raf1	Dsor1	14.0	-1.2563	78.0	1.0189	88.0	1.6254	14.0	-0.7978	12.0	-1.1327	206.0	0.1058
FBgn0010303	CG4353	hemipterous	hep	116.0	1.3389	77.0	1.7284	40.0	-0.3007	9.0	-1.261	36.0	0.6778	278.0	1.3742	100.0	1.3785	48.0	-0.0451	20.0	-0.8353	10.0	-1.2435	37.0	2.4279	215.0	0.6258	25.0	26.0	25.0	26.0	24.0	23.0	20.0	23.0	22.0	20.0	26.0	21.0	24.0	26.0	24.0	22.0	20.0	23.0	23.0	25.0	23.4	2.062190965683675
FBgn0010315	CG9096	Cyclin D	CycD	16.0	-1.2386	18.0	-1.9537	0.0	-1.5853	1.0	-2.937	20.0	-0.0857	55.0	-3.0983	80.0	0.0622	46.0	-1.2311	47.0	0.9279	3.0	-0.9763	37.0	0.193	213.0	-0.5785	19.0	19.0	21.0	19.0	22.0	17.0	18.0	18.0	18.0	19.0	18.0	19.0	22.0	20.0	17.0	18.0	19.0	18.0	18.0	18.0	18.85	1.4244112357114613
FBgn0010333	CG2248	Rac1	Rac1	77.0	-0.5668	62.0	0.6658	4.0	-2.4657	5.0	-1.5973	6.0	-0.6425	154.0	-2.236	184.0	1.7877	43.0	0.0598	14.0	-1.0411	33.0	0.3871	34.0	2.4453	308.0	2.5802	21.0	18.0	20.0	19.0	21.0	22.0	23.0	20.0	17.0	16.0	20.0	20.0	17.0	18.0	19.0	20.0	19.0	21.0	17.0	25.0	19.65	2.207046132634963
FBgn0010341	CG12530	Cdc42	Cdc42	0.0	-1.8048	0.0	-2.8554	0.0	-1.5853	0.0	-3.1595	0.0	-2.2274	0.0	-4.6335	0.0	-1.5952	0.0	-3.865	0.0	-5.5331	0.0	-1.1749	0.0	-3.3783	0.0	-5.6078	20.0	18.0	21.0	21.0	21.0	22.0	20.0	20.0	21.0	22.0	20.0	20.0	21.0	20.0	21.0	21.0	21.0	19.0	20.0	21.0	20.5	0.9459053029269173
FBgn0010379	CG4006	Akt1	Akt1	0.0	-6.3624	0.0	-1.2811	0.0	-1.6678	0.0	-1.2864	0.0	-2.7623	0.0	-5.3162	0.0	-5.5728	0.0	-2.9882	0.0	-3.6144	0.0	-1.8116	0.0	-2.0329	0.0	-7.2322	0.0	0.0	1.0	1.0	1.0	1.0	1.0	1.0	2.0	1.0	1.0	1.0	1.0	2.0	1.0	1.0	1.0	1.0	1.0	1.0	1.0	0.45883146774112354
FBgn0010382	CG3938	Cyclin E	CycE	44.0	-4.2621	42.0	-0.0877	30.0	0.3025	11.0	-2.5044	10.0	-0.6465	137.0	-2.3918	134.0	1.1809	91.0	1.3456	42.0	0.2406	25.0	0.4799	35.0	0.0	327.0	2.1133	21.0	21.0	20.0	22.0	20.0	21.0	18.0	21.0	20.0	21.0	23.0	20.0	22.0	21.0	18.0	23.0	20.0	18.0	19.0	21.0	20.5	1.4689774459950382
FBgn0010389	CG7223	heartless	htl	85.0	-0.1759	66.0	0.9492	49.0	0.2406	21.0	-0.2522	19.0	-0.0704	240.0	0.2679
FBgn0010433	CG7508	atonal	ato	91.0	0.1173	86.0	2.3659	35.0	-0.6014	26.0	0.1681	20.0	-0.0264	258.0	0.7919
FBgn0010441	CG5974	pelle	pll	27.0	-4.078	56.0	0.2198	11.0	-1.1119	11.0	-0.3037	37.0	0.2437	142.0	-1.6229	102.0	0.0109	64.0	0.2643	17.0	-2.0059	1.0	-1.7362	3.0	-1.8226	187.0	-1.8612	19.0	26.0	18.0	23.0	19.0	22.0	22.0	19.0	21.0	18.0	21.0	19.0	16.0	20.0	21.0	20.0	21.0	22.0	16.0	20.0	20.15	2.345768867332707
FBgn0010453	CG4698	Wnt oncogene analog 4	Wnt4	1.0	-4.2806	5.0	-3.3717	85.0	2.4055	2.0	-1.8495	17.0	-0.1584	110.0	-3.5171	120.0	0.2581	74.0	1.0905	21.0	-0.673	56.0	2.5072	18.0	0.1164	289.0	1.9501	22.0	21.0	18.0	18.0	22.0	23.0	24.0	23.0	20.0	20.0	21.0	22.0	22.0	24.0	20.0	20.0	18.0	22.0	20.0	19.0	20.95	1.8771478925557026
FBgn0010504	CG11546	kermit	kermit	170.0	9.231	30.0	-2.7189	69.0	4.5153	31.0	1.7404	31.0	1.9643	331.0	6.1378	202.0	5.9512	51.0	0.2254	45.0	1.2529	28.0	0.9948	25.0	0.4186	351.0	4.0644	20.0	23.0	21.0	23.0	21.0	22.0	21.0	19.0	18.0	20.0	20.0	20.0	21.0	22.0	22.0	19.0	22.0	24.0	20.0	22.0	21.0	1.5217718205053645
FBgn0010583	CG3727	dreadlocks	dock	76.0	0.0677	59.0	0.3002	13.0	-1.0108	20.0	0.5003	29.0	-0.4062	197.0	-0.1925
FBgn0010825	CG6964	Grunge	Gug	0.0	-6.3624	0.0	-1.2811	0.0	-1.6678	0.0	-1.2864	0.0	-2.7623	0.0	-5.3162	0.0	-5.5728	0.0	-2.9882	0.0	-3.6144	0.0	-1.8116	0.0	-2.0329	0.0	-7.2322	14.0	15.0	13.0	12.0	10.0	12.0	16.0	15.0	15.0	16.0	11.0	12.0	14.0	13.0	16.0	15.0	11.0	12.0	17.0	14.0	13.65	1.9808291724745763
FBgn0010909	CG16973	misshapen	msn	0.0	-1.7265	0.0	-1.5121	0.0	-2.6317	0.0	-1.657	0.0	-2.3249	0.0	-6.7036	0.0	-2.6099	0.0	-1.3698	0.0	-1.7772	0.0	-2.6546	0.0	-2.5036	0.0	-7.6344	8.0	7.0	8.0	7.0	9.0	7.0	11.0	8.0	8.0	8.0	7.0	9.0	9.0	7.0	7.0	11.0	8.0	11.0	12.0	8.0	8.5	1.5727950313140984
FBgn0011202	CG1768	diaphanous	dia	114.0	-0.43	55.0	-1.2756	30.0	-1.6414	21.0	-1.6288	42.0	1.847	262.0	-0.9667	131.0	2.7682	53.0	0.4058	29.0	-0.0835	35.0	1.8653	20.0	-0.4186	268.0	1.9658	17.0	17.0	19.0	18.0	17.0	19.0	16.0	20.0	17.0	20.0	20.0	20.0	22.0	19.0	21.0	20.0	19.0	18.0	20.0	17.0	18.8	1.609184167275618
FBgn0011236	CG5575	ken and barbie	ken	38.0	-2.4726	41.0	-0.8217	23.0	-1.323	15.0	-0.7566	15.0	-0.2465	132.0	-2.8765	142.0	0.7839	78.0	1.2235	36.0	0.1157	19.0	-0.9033	41.0	3.4642	316.0	2.8455	21.0	19.0	21.0	19.0	19.0	22.0	20.0	17.0	18.0	19.0	22.0	18.0	19.0	20.0	18.0	19.0	17.0	21.0	20.0	21.0	19.5	1.5043795713638368
FBgn0011274	CG6794	Dorsal-related immunity factor	Dif	0.0	-4.3294	1.0	-3.6551	15.0	-1.8042	11.0	-1.0929	11.0	-0.4225	38.0	-5.6133	170.0	3.7334	82.0	1.179	55.0	1.5896	29.0	0.3774	41.0	0.8412	377.0	3.596	20.0	18.0	22.0	20.0	21.0	23.0	19.0	18.0	22.0	23.0	23.0	23.0	22.0	20.0	20.0	23.0	20.0	23.0	21.0	21.0	21.1	1.6827296120792619
FBgn0011300	CG8224	baboon	babo	59.0	-1.3706	80.0	0.863	36.0	0.1516	9.0	-0.4824	41.0	0.5687	225.0	0.5358
FBgn0011591	CG10580	fringe	fng	59.0	0.2553	64.0	0.5646	40.0	-0.6966	25.0	-0.1227	24.0	0.0596	212.0	0.3041
FBgn0011642	CG32018	Zyxin	Zyx	145.0	3.144	105.0	1.8949	54.0	-0.0194	59.0	1.9639	15.0	-0.8346	378.0	5.7913	36.0	-1.7495	4.0	-1.2368	42.0	0.4312	37.0	0.7558	22.0	0.6987	141.0	-2.9583	19.0	22.0	19.0	22.0	20.0	20.0	21.0	22.0	18.0	20.0	18.0	22.0	19.0	22.0	20.0	21.0	20.0	20.0	20.0	18.0	20.15	1.3869694338832113
FBgn0011648	CG12399	Mothers against dpp	Mad	0.0	-1.7265	145.0	3.1929	20.0	-1.6641	28.0	0.0614	36.0	1.2519	229.0	0.8661
FBgn0011655	CG1775	Medea	Med	151.0	10.4155	73.0	-1.8871	55.0	3.0671	43.0	-0.5322	34.0	0.0263	356.0	2.9992	86.0	-1.7056	78.0	2.9441	41.0	8.2158	40.0	3.1272	19.0	-0.8724	264.0	2.9821	21.0	18.0	22.0	20.0	21.0	20.0	23.0	20.0	20.0	23.0	19.0	19.0	19.0	19.0	19.0	21.0	18.0	19.0	18.0	18.0	19.85	1.565247584249851
FBgn0011692	CG1258	pavarotti	pav	0.0	-1.8048	0.0	-2.8554	0.0	-1.5853	0.0	-3.1595	0.0	-2.2274	0.0	-4.6335	0.0	-1.5952	1.0	-3.8078	0.0	-5.5331	0.0	-1.1749	0.0	-3.3783	1.0	-5.5842	0.0	0.0	0.0	0.0	0.0	0.0	0.0	0.0	4.0	7.0	11.0	8.0	9.0	6.0	4.0	8.0	6.0	3.0	13.0	8.0	4.35	4.27076968288042
FBgn0011739	CG12072	warts	wts	66.0	-1.9062	4.0	-8.4198	27.0	-0.0216	2.0	-4.4146	16.0	0.0995	115.0	-3.3591	153.0	1.5745	71.0	0.2004	47.0	0.9279	52.0	2.267	24.0	-1.0618	347.0	2.5855	20.0	19.0	19.0	20.0	20.0	19.0	17.0	19.0	18.0	17.0	22.0	17.0	17.0	21.0	17.0	21.0	21.0	18.0	25.0	20.0	19.35	2.0589982234597795
FBgn0011817	CG7892	nemo	nmo	138.0	5.3133	47.0	-0.0214	61.0	1.4151	30.0	1.3936	13.0	-1.7061	289.0	2.2003	108.0	0.3394	37.0	-1.1079	36.0	-0.2082	18.0	-0.4529	29.0	0.0	228.0	-0.6836	24.0	22.0	21.0	21.0	21.0	19.0	20.0	20.0	21.0	21.0	20.0	18.0	22.0	21.0	19.0	22.0	24.0	23.0	19.0	18.0	20.8	1.7350868323485935
FBgn0011822	CG13374	Pepsinogen C-like	Pgcl	48.0	-0.1142	64.0	0.5646	46.0	-0.4064	30.0	0.1841	10.0	-1.3314	198.0	-0.1587
FBgn0011826	CG9842	Protein phosphatase 2B at 14D	Pp2B-14D	21.0	-4.5857	95.0	1.265	24.0	-0.4549	3.0	-1.0184	46.0	0.9749	189.0	-0.4005
FBgn0014006	CG4720	Apoptotic signal-regulating kinase 1	Ask1	67.0	-1.0555	40.0	-0.8925	30.0	-0.9021	8.0	-1.3451	13.0	-0.3345	158.0	-2.1196	152.0	2.7481	49.0	-0.498	52.0	1.3057	34.0	0.7549	23.0	-0.4206	310.0	1.6716	22.0	23.0	21.0	21.0	18.0	21.0	18.0	21.0	21.0	21.0	20.0	21.0	19.0	20.0	22.0	19.0	17.0	17.0	18.0	22.0	20.1	1.7740824166460347
FBgn0014011	CG8556	Rac2	Rac2	0.0	-4.7429	0.0	-3.5457	0.0	-2.5488	0.0	-2.8075	0.0	-1.7442	0.0	-9.6009	0.0	-3.1045	0.0	-4.3731	0.0	-2.5058	0.0	-2.4871	0.0	-3.7675	0.0	-4.8103	14.0	11.0	12.0	16.0	12.0	11.0	16.0	11.0	13.0	12.0	12.0	11.0	14.0	12.0	11.0	12.0	16.0	12.0	14.0	12.0	12.7	1.719853114903161
FBgn0014018	CG11992	Relish	Rel	83.0	1.0614	121.0	2.4141	54.0	-0.0194	33.0	0.3682	33.0	0.9538	324.0	4.0063	90.0	0.9302	69.0	1.8484	26.0	-0.3341	35.0	1.8653	10.0	-2.093	230.0	1.005	20.0	20.0	24.0	20.0	20.0	19.0	22.0	20.0	18.0	19.0	21.0	23.0	19.0	19.0	22.0	22.0	25.0	20.0	20.0	26.0	20.95	2.1636956688426454
FBgn0014020	CG8416	Rho1	Rho1	0.0	-4.3294	0.0	-3.7259	0.0	-2.7062	0.0	-2.0176	0.0	-0.9066	0.0	-6.7197	0.0	-2.6099	0.0	-1.3698	0.0	-1.7772	0.0	-2.6546	0.0	-2.5036	0.0	-7.6344	0.0	0.0	0.0	0.0	0.0	0.0	0.0	0.0	0.0	0.0	0.0	0.0	0.0	0.0	0.0	0.0	0.0	0.0	0.0	0.0	0.0	0.0
FBgn0014135	CG4608	branchless	bnl	70.0	-0.44	74.0	0.7022	15.0	-0.9097	2.0	-1.1078	43.0	0.7312	204.0	-0.0104
FBgn0014343	CG10601	mirror	mirr	42.0	-0.3185	6.0	-2.5548	0.0	-1.5853	0.0	-3.1595	1.0	-2.1203	49.0	-3.2658	66.0	-1.0325	3.0	-1.27	0.0	-1.7772	0.0	-2.6546	0.0	-2.5036	69.0	-5.3461	19.0	19.0	17.0	17.0	20.0	16.0	21.0	18.0	18.0	19.0	18.0	18.0	20.0	21.0	19.0	20.0	20.0	21.0	19.0	19.0	18.95	1.394538218230416
FBgn0014388	CG1921	sprouty	sty	81.0	1.0617	55.0	-0.1002	34.0	0.7582	28.0	3.0705	12.0	-0.9424	210.0	1.2282	72.0	0.1233	65.0	1.4878	39.0	0.7517	28.0	0.9948	29.0	1.0884	233.0	1.0809	27.0	25.0	22.0	23.0	22.0	20.0	23.0	27.0	21.0	23.0	22.0	23.0	20.0	23.0	23.0	20.0	23.0	22.0	27.0	23.0	22.95	2.139232523470435
FBgn0015024	CG2028	Casein kinase Ialpha	CkIalpha	60.0	-1.3975	72.0	1.3742	14.0	-1.8643	38.0	1.1769	25.0	0.1936	209.0	-0.6347
FBgn0015218	CG4035	eukaryotic translation initiation factor 4E1	eIF4E1	0.0	-1.7265	0.0	-1.5121	0.0	-2.6317	0.0	-1.657	0.0	-2.3249	0.0	-6.7036	0.0	-3.1045	0.0	-4.3731	0.0	-2.5058	0.0	-2.4871	0.0	-3.7675	0.0	-4.8103	0.0	0.0	0.0	0.0	0.0	0.0	0.0	0.0	0.0	0.0	0.0	0.0	0.0	0.0	0.0	0.0	0.0	0.0	0.0	0.0	0.0	0.0
FBgn0015279	CG4141	Pi3K92E	Pi3K92E	82.0	5.3898	61.0	-2.3455	19.0	0.1614	19.0	-3.7251	19.0	-1.9484	200.0	-0.6618
FBgn0015295	CG18247	SH2 ankyrin repeat kinase	Shark	106.0	1.834	60.0	0.4348	11.0	-2.0995	35.0	0.491	27.0	0.3577	239.0	1.1966	168.0	1.4053	27.0	-0.4721	54.0	1.0621	47.0	1.6776	9.0	-1.1936	305.0	2.4807	20.0	21.0	26.0	20.0	20.0	19.0	23.0	21.0	20.0	21.0	22.0	20.0	19.0	19.0	20.0	21.0	22.0	20.0	23.0	21.0	20.9	1.6827296120792616
FBgn0015296	CG3715	SHC-adaptor protein	Shc	179.0	4.5297	71.0	0.7013	50.0	1.861	35.0	4.6279	9.0	-1.2636	344.0	4.9685	114.0	0.1147	24.0	-0.5718	35.0	0.0631	25.0	-0.3503	14.0	-0.4658	212.0	-0.6036	22.0	20.0	22.0	21.0	21.0	20.0	20.0	20.0	20.0	22.0	20.0	19.0	20.0	20.0	19.0	19.0	21.0	21.0	18.0	22.0	20.35	1.1367080817685313
FBgn0015300	CG13591	Suppressor of Stellate-like	Ssl	64.0	0.4601	40.0	-0.8516	37.0	0.9649	23.0	1.958	14.0	-0.7282	178.0	0.335
FBgn0015379	CG17051	dodo	dod	121.0	2.4772	68.0	0.551	51.0	1.9299	36.0	4.8504	1.0	-2.1203	277.0	3.0983	176.0	1.5965	59.0	0.5918	58.0	1.2725	25.0	-0.3503	38.0	3.0276	356.0	4.1721	22.0	18.0	21.0	20.0	20.0	21.0	16.0	20.0	20.0	21.0	22.0	19.0	18.0	19.0	19.0	22.0	20.0	20.0	21.0	19.0	19.9	1.5183093090324968
FBgn0015399	CG12283	kekkon 1	kek1	121.0	2.4772	49.0	-0.4008	5.0	-1.2406	2.0	-2.7145	38.0	1.8419	215.0	1.3677	117.0	0.8287	76.0	0.4867	55.0	2.0277	29.0	0.7446	42.0	0.6757	319.0	1.9244	19.0	19.0	18.0	19.0	19.0	19.0	22.0	20.0	21.0	21.0	18.0	20.0	21.0	21.0	19.0	21.0	20.0	21.0	21.0	19.0	19.9	1.165287405253358
FBgn0015402	CG2899	kinase suppressor of ras	ksr	41.0	-2.8935	60.0	0.327	21.0	-0.6065	3.0	-1.0184	54.0	1.6249	179.0	-0.6606
FBgn0015509	CG1877	Cullin 1	Cul1	70.0	-0.44	79.0	0.8362	55.0	1.1119	16.0	0.1429	41.0	0.5687	261.0	1.4721	138.0	1.9817	54.0	-0.2439	51.0	1.2111	33.0	0.6794	46.0	1.1917	322.0	2.0163	19.0	23.0	22.0	19.0	20.0	22.0	19.0	18.0	20.0	18.0	21.0	19.0	22.0	17.0	21.0	23.0	19.0	18.0	22.0	20.0	20.1	1.8035053587243284
FBgn0015589	CG1451	APC-like	Apc	86.0	-0.127	57.0	0.3117	48.0	0.1804	37.0	1.0929	16.0	-0.2024	244.0	0.3843
FBgn0015614	CG11217	Calcineurin B2	CanB2	82.0	1.097	127.0	3.5066	52.0	1.9988	18.0	0.8455	29.0	0.8781	308.0	3.9636	135.0	1.2016	85.0	1.002	54.0	1.8902	42.0	1.6051	29.0	-0.5791	345.0	2.5383	19.0	22.0	23.0	18.0	22.0	21.0	19.0	21.0	22.0	20.0	22.0	19.0	22.0	22.0	22.0	22.0	21.0	23.0	19.0	21.0	21.0	1.4867838833500566
FBgn0015625	CG5814	Cyclin B3	CycB3	95.0	1.5571	50.0	-0.3507	9.0	-0.9649	54.0	8.8554	10.0	-1.1566	218.0	1.4515	130.0	1.098	80.0	0.7157	43.0	0.378	32.0	0.9432	31.0	-0.3861	316.0	1.8535	19.0	21.0	20.0	24.0	22.0	26.0	23.0	27.0	19.0	19.0	21.0	18.0	24.0	20.0	22.0	21.0	18.0	20.0	23.0	24.0	21.55	2.564432839727663
FBgn0015765	CG5475	p38a MAP kinase	p38a	80.0	-0.4069	27.0	-3.3767	41.0	1.4907	18.0	-1.0187	24.0	1.094	190.0	-0.0616
FBgn0015799	CG7413	Retinoblastoma-family protein	Rbf	38.0	-2.4726	41.0	-0.8217	13.0	-1.9244	18.0	-0.5044	13.0	-0.3345	123.0	-3.1386	35.0	-1.5354	62.0	1.2173	14.0	-1.3364	16.0	-0.4974	21.0	-0.2512	148.0	-1.0683	25.0	27.0	24.0	27.0	31.0	31.0	31.0	29.0	31.0	29.0	30.0	26.0	22.0	32.0	29.0	27.0	30.0	26.0	30.0	27.0	28.2	2.706716791515818
FBgn0015805	CG7471	Histone deacetylase 1	HDAC1	67.0	-0.6938	59.0	0.3002	35.0	0.1011	27.0	1.1256	19.0	-1.2187	207.0	0.0676
FBgn0015838	CG8075	Van Gogh	Vang	86.0	0.9137	96.0	1.2918	33.0	0.0	14.0	-0.0357	31.0	-0.2437	260.0	1.4461	151.0	2.6933	55.0	-0.1931	34.0	-0.3974	32.0	0.6039	25.0	-0.2804	297.0	1.2982	21.0	23.0	20.0	20.0	19.0	22.0	16.0	21.0	23.0	23.0	20.0	24.0	23.0	23.0	20.0	22.0	20.0	21.0	20.0	25.0	21.3	2.054520048960084
FBgn0015905	CG4426	asteroid	ast	113.0	3.1981	76.0	0.7558	43.0	0.5054	22.0	0.679	39.0	0.4062	293.0	2.3044	64.0	-0.2354	58.0	0.8566	28.0	-0.1671	24.0	0.4974	40.0	2.9303	214.0	0.6005	21.0	20.0	22.0	22.0	25.0	24.0	21.0	23.0	20.0	23.0	21.0	23.0	22.0	21.0	19.0	21.0	18.0	20.0	20.0	22.0	21.4	1.698296359978373
FBgn0016081	CG32045	furry	fry	75.0	-0.9424	53.0	2.3242	35.0	0.8426	3.0	-4.2023	4.0	-1.3924	170.0	-0.9409
FBgn0016131	CG5072	Cyclin-dependent kinase 4	Cdk4	83.0	5.4627	79.0	-1.6579	30.0	1.0493	31.0	-2.1286	33.0	-0.1053	256.0	0.6524
FBgn0016797	CG9739	frizzled 2	fz2	124.0	4.1288	52.0	0.1126	16.0	-0.8592	37.0	2.019	12.0	-1.7874	241.0	0.9519
FBgn0016917	CG4257	Signal-transducer and activator of transcription protein at 92E	Stat92E	64.0	0.4232	74.0	0.8891	25.0	-1.4223	45.0	1.1047	15.0	-0.8346	223.0	0.6677
FBgn0016977	CG18497	split ends	spen	60.0	0.2889	67.0	0.6619	31.0	-1.132	19.0	-0.491	24.0	0.0596	201.0	-0.0595
FBgn0017572	CG4083	Mo25	Mo25	111.0	3.0289	71.0	0.6218	11.0	-1.1119	6.0	-0.7504	20.0	-1.1374	219.0	0.3797
FBgn0020224	CG7037	Cbl proto-oncogene	Cbl	25.0	-3.1078	32.0	-1.4592	18.0	-1.6237	24.0	0.0	9.0	-0.5105	108.0	-3.5753	144.0	0.8317	65.0	0.7913	43.0	0.4837	20.0	-0.8111	10.0	-1.048	282.0	1.7179	19.0	22.0	22.0	20.0	23.0	23.0	23.0	20.0	24.0	24.0	24.0	22.0	18.0	24.0	24.0	21.0	19.0	24.0	26.0	27.0	22.45	2.372540277512914
FBgn0020238	CG31196	14-3-3epsilon	14-3-3epsilon	133.0	2.7409	62.0	0.4997	42.0	-0.5999	45.0	1.1047	30.0	0.6558	312.0	3.6096	112.0	0.0669	42.0	0.0266	26.0	-0.4101	27.0	-0.1659	5.0	-1.7758	212.0	-0.6036	23.0	17.0	19.0	19.0	20.0	17.0	19.0	21.0	21.0	20.0	17.0	16.0	16.0	18.0	19.0	19.0	19.0	19.0	21.0	16.0	18.8	1.908430051942668
FBgn0020248	CG33166	stem cell tumor	stet	152.0	3.5742	84.0	1.3525	26.0	0.2068	31.0	3.738	22.0	0.1285	315.0	4.159	184.0	1.7877	66.0	0.8245	32.0	-0.0946	26.0	-0.2581	26.0	1.2809	334.0	3.4424	22.0	21.0	23.0	21.0	21.0	24.0	21.0	21.0	20.0	20.0	21.0	23.0	23.0	20.0	22.0	21.0	21.0	21.0	20.0	20.0	21.3	1.1742858972247996
FBgn0020251	CG8339	sulfateless	sfl	66.0	0.5308	44.0	-0.6512	15.0	-0.5514	19.0	1.068	29.0	0.8781	173.0	0.1954
FBgn0020299	CG31317	stumps	stumps	29.0	-0.7785	98.0	2.0539	28.0	0.3446	24.0	2.1805	29.0	0.8781	208.0	1.1723	89.0	0.2486	92.0	1.4029	32.0	-1.1341	28.0	0.6785	24.0	-1.0618	265.0	0.6493	21.0	21.0	20.0	23.0	23.0	18.0	20.0	21.0	18.0	19.0	25.0	19.0	22.0	19.0	20.0	21.0	22.0	19.0	21.0	20.0	20.6	1.7888543819998317
FBgn0020386	CG1210	Phosphoinositide-dependent kinase 1	Pdk1	41.0	-2.326	27.0	-1.8134	0.0	-2.7062	1.0	-1.9335	0.0	-0.9066	69.0	-4.7108	116.0	0.1625	8.0	-1.1038	0.0	-1.7772	5.0	-2.1938	3.0	-2.0669	132.0	-3.2567	17.0	18.0	17.0	17.0	18.0	17.0	16.0	16.0	18.0	18.0	19.0	16.0	17.0	16.0	18.0	17.0	16.0	18.0	17.0	17.0	17.15	0.8750939799154205
FBgn0020388	CG4107	Gcn5 acetyltransferase	Gcn5	72.0	-0.8112	95.0	3.0034	42.0	-0.1804	27.0	0.2522	19.0	-0.0704	255.0	0.7046
FBgn0020493	CG5201	Daughters against dpp	Dad	63.0	0.3896	6.0	-1.3174	92.0	1.819	30.0	0.1841	35.0	1.1525	226.0	0.7669
FBgn0020496	CG7583	C-terminal Binding Protein	CtBP	0.0	-6.3624	0.0	-1.2811	1.0	-1.6173	0.0	-1.2864	0.0	-2.7623	1.0	-5.2902	0.0	-5.5728	0.0	-2.9882	12.0	-2.479	7.0	-1.2832	0.0	-2.0329	19.0	-6.6865	12.0	9.0	9.0	13.0	11.0	10.0	12.0	10.0	10.0	11.0	12.0	9.0	10.0	12.0	9.0	9.0	12.0	11.0	11.0	10.0	10.6	1.2732056517228265
FBgn0020622	CG2699	Pi3K21B	Pi3K21B	65.0	4.1516	65.0	-2.1927	27.0	0.8071	36.0	-1.4634	28.0	-0.7636	221.0	-0.169
FBgn0020660	CG10837	eukaryotic translation initiation factor 4B	eIF4B	137.0	3.0434	76.0	0.9518	40.0	1.1717	36.0	4.8504	6.0	-1.5849	295.0	3.6007	122.0	2.3648	45.0	-0.3156	24.0	-0.5012	11.0	-1.1192	32.0	1.5907	234.0	1.1062	16.0	13.0	20.0	17.0	17.0	15.0	18.0	20.0	19.0	21.0	17.0	19.0	21.0	19.0	17.0	16.0	19.0	17.0	21.0	16.0	17.9	2.174009151193639
FBgn0020767	CG10155	Sprouty-related protein with EVH-1 domain	Spred	66.0	-1.9062	49.0	1.4471	35.0	0.8426	6.0	-3.5656	21.0	0.7211	177.0	-0.6331
FBgn0021796	CG5092	Target of rapamycin	Tor	0.0	-1.7265	0.0	-1.5121	0.0	-2.6317	0.0	-1.657	0.0	-2.3249	0.0	-6.7036	0.0	-2.6099	0.0	-1.3698	0.0	-1.7772	0.0	-2.6546	0.0	-2.5036	0.0	-7.6344	1.0	1.0	1.0	1.0	1.0	1.0	1.0	1.0	1.0	1.0	1.0	1.0	1.0	1.0	1.0	1.0	1.0	1.0	1.0	1.0	1.0	0.0
FBgn0021874	CG2863	Notchless	Nle	0.0	-2.175	0.0	-1.3651	0.0	-1.1766	0.0	-1.5788	0.0	-1.9905	0.0	-7.8519	0.0	-3.8227	0.0	-5.2242	0.0	-4.0661	0.0	-2.1475	0.0	-3.8639	0.0	-5.3641	0.0	0.0	0.0	0.0	0.0	0.0	0.0	0.0	0.0	0.0	0.0	0.0	0.0	0.0	0.0	0.0	0.0	0.0	0.0	0.0	0.0	0.0
FBgn0022787	CG4261	Helicase 89B	Hel89B	120.0	3.7904	63.0	0.4074	20.0	-0.657	15.0	0.0536	45.0	0.8937	263.0	1.5241	64.0	-0.2693	84.0	0.9448	66.0	3.5398	44.0	1.7375	6.0	-2.7992	264.0	0.6257	23.0	26.0	25.0	22.0	24.0	25.0	21.0	26.0	24.0	24.0	23.0	21.0	23.0	20.0	26.0	19.0	27.0	23.0	22.0	24.0	23.4	2.137386500526187
FBgn0023001	CG8624	melted	melt	0.0	-1.8048	88.0	1.5529	88.0	4.4801	27.0	2.848	16.0	-0.514	219.0	1.4794	100.0	0.4765	118.0	2.8916	52.0	1.6153	37.0	1.2742	18.0	-1.6409	325.0	2.066	21.0	19.0	19.0	19.0	21.0	19.0	18.0	20.0	19.0	19.0	21.0	20.0	21.0	20.0	20.0	19.0	21.0	20.0	20.0	21.0	19.85	0.9333020044867306
FBgn0023169	CG3051	AMP-activated protein kinase alpha subunit	AMPKalpha	69.0	-0.9578	68.0	1.0909	0.0	-2.7062	25.0	0.0841	16.0	-0.2024	178.0	-1.5373	236.0	3.0305	80.0	1.29	4.0	-1.5669	46.0	1.5854	22.0	0.6987	388.0	5.2333	19.0	19.0	20.0	20.0	22.0	22.0	21.0	21.0	21.0	18.0	21.0	24.0	20.0	21.0	22.0	21.0	25.0	21.0	25.0	22.0	21.25	1.8317377426626154
FBgn0023441	CG8205	fusilli	fus	87.0	0.9984	60.0	0.327	33.0	0.0	12.0	-0.2144	30.0	-0.325	222.0	0.4578
FBgn0023518	CG3848	trithorax-related	trr	0.0	-6.3624	0.0	-1.2811	0.0	-1.6678	0.0	-1.2864	0.0	-2.7623	0.0	-5.3162	0.0	-5.5728	0.0	-2.9882	0.0	-3.6144	0.0	-1.8116	0.0	-2.0329	0.0	-7.2322	15.0	8.0	7.0	12.0	15.0	11.0	12.0	13.0	10.0	11.0	16.0	15.0	13.0	11.0	11.0	9.0	12.0	10.0	15.0	10.0	11.8	2.5047323630532494
FBgn0024194	CG11495	rasp	rasp	91.0	1.4155	64.0	0.3507	23.0	0.0	14.0	-0.0445	8.0	-1.3707	200.0	0.949
FBgn0024222	CG4201	I-kappaB kinase beta	IKKbeta	106.0	2.6059	53.0	0.1394	34.0	0.0505	9.0	-0.4824	31.0	-0.2437	233.0	0.7438
FBgn0024234	CG5562	glass bottom boat	gbb	85.0	5.6083	36.0	-3.3005	33.0	1.2914	24.0	-3.0599	24.0	-1.2901	202.0	-0.6149
FBgn0024248	CG5686	chico	chico	6.0	-4.0362	78.0	1.7992	21.0	-1.4433	18.0	-0.5044	33.0	0.5457	156.0	-2.1778	109.0	-0.0048	31.0	-0.3391	29.0	-0.2524	14.0	-1.3642	11.0	-0.9024	194.0	-1.2005	17.0	15.0	17.0	15.0	16.0	15.0	15.0	15.0	16.0	16.0	17.0	16.0	18.0	14.0	19.0	17.0	20.0	17.0	18.0	19.0	16.6	1.6026294183720637
FBgn0024250	CG9653	brinker	brk	93.0	0.215	72.0	1.3742	18.0	-1.6237	24.0	0.0	12.0	-0.3785	219.0	-0.3436
FBgn0024291	CG5216	Sirtuin 1	Sirt1	0.0	-4.3294	3.0	-3.5134	0.0	-2.7062	0.0	-2.0176	0.0	-0.9066	3.0	-6.6324	0.0	-5.5728	0.0	-2.9882	0.0	-3.6144	0.0	-1.8116	0.0	-2.0329	0.0	-7.2322	20.0	17.0	18.0	18.0	18.0	17.0	17.0	16.0	19.0	20.0	19.0	21.0	15.0	18.0	20.0	20.0	20.0	19.0	19.0	19.0	18.5	1.538967528127731
FBgn0024326	CG9738	MAP kinase kinase 4	Mkk4	62.0	-1.2998	88.0	2.5076	51.0	0.3608	12.0	-1.0088	36.0	0.6778	249.0	0.5299
FBgn0024329	CG7717	Mekk1	Mekk1	153.0	3.4127	72.0	0.8242	45.0	-0.4547	32.0	0.3069	39.0	1.55	341.0	4.5683	171.0	1.477	60.0	0.625	26.0	-0.4101	28.0	-0.0737	18.0	0.1164	303.0	2.4144	23.0	20.0	24.0	20.0	19.0	22.0	22.0	23.0	22.0	22.0	24.0	23.0	23.0	25.0	24.0	23.0	22.0	20.0	23.0	22.0	22.3	1.5593520921743174
FBgn0024836	CG11895	starry night	stan	52.0	0.0354	97.0	2.0038	31.0	0.5514	29.0	3.293	34.0	1.4136	243.0	2.1493	82.0	0.1036	82.0	0.8303	43.0	0.378	18.0	0.0165	2.0	-3.1853	227.0	-0.2479	22.0	21.0	20.0	21.0	22.0	23.0	22.0	21.0	23.0	19.0	19.0	20.0	21.0	20.0	22.0	24.0	21.0	26.0	23.0	23.0	21.65	1.7252002172135505
FBgn0024846	CG7393	p38b MAP kinase	p38b	62.0	-1.2998	70.0	1.2325	44.0	-0.0601	10.0	-1.1769	34.0	0.5897	220.0	-0.3144
FBgn0024913	CG11062	Activin-beta	Actbeta	46.0	-0.1769	70.0	0.6512	38.0	1.0339	29.0	3.293	27.0	0.6639	210.0	1.2282	82.0	0.7071	45.0	-0.8052	37.0	2.0003	19.0	-0.2408	21.0	1.3375	204.0	0.5766	20.0	19.0	19.0	18.0	20.5	20.5	20.5	20.0	21.5	20.5	19.0	19.5	19.0	20.0	21.0	19.0	19.5	18.0	18.0	18.5	19.55	1.5012815038646665
FBgn0025574	CG5212	Pellino	Pli	88.0	1.3094	45.0	-0.6011	14.0	-0.6203	1.0	-2.937	33.0	1.3065	181.0	0.4187
FBgn0025637	CG16983	SKP1-related A	SkpA	47.0	-0.1478	15.0	-1.0253	8.0	-2.2447	8.0	-1.1661	10.0	-1.3314	88.0	-3.7948	130.0	0.4971	20.0	-0.7048	8.0	-1.3566	23.0	-0.5346	15.0	-0.3202	196.0	-1.1342	19.0	19.0	20.0	20.0	17.0	19.0	19.0	17.0	18.0	18.0	17.0	20.0	21.0	18.0	21.0	19.0	17.0	17.0	23.0	21.0	19.0	1.685854460847049
FBgn0025638	CG16982	Regulator of cullins 1a	Roc1a	0.0	-4.7429	0.0	-3.5457	0.0	-2.5488	0.0	-2.8075	0.0	-1.7442	0.0	-9.6009	0.0	-3.1045	0.0	-4.3731	0.0	-2.5058	0.0	-2.4871	0.0	-3.7675	0.0	-4.8103	0.0	0.0	0.0	0.0	0.0	0.0	0.0	0.0	0.0	0.0	0.0	0.0	0.0	0.0	0.0	0.0	0.0	0.0	0.0	0.0	0.0	0.0
FBgn0025641	CG14622	Dishevelled Associated Activator of Morphogenesis	DAAM	114.0	2.2295	4.0	-2.655	59.0	2.4813	25.0	2.403	35.0	1.5207	237.0	1.9818	108.0	1.7372	60.0	1.0369	40.0	0.8353	28.0	0.9948	41.0	3.0977	277.0	2.1934	22.0	21.0	23.0	25.0	20.0	19.0	19.0	22.0	21.0	21.0	22.0	22.0	24.0	24.0	22.0	19.0	21.0	20.0	21.0	23.0	21.55	1.700619082322051
FBgn0025777	CG11324	homer	homer	188.0	1.172	80.0	1.9891	39.0	1.593	18.0	0.1651	28.0	3.3965	353.0	3.8214	140.0	3.1717	38.0	-0.9468	35.0	0.4176	46.0	3.2332	35.0	2.093	294.0	2.6232	25.0	25.0	26.0	25.0	26.0	24.0	24.0	22.0	26.0	24.0	22.0	18.0	26.0	25.0	26.0	24.0	26.0	25.0	24.0	22.0	24.25	1.996707816698065
FBgn0025800	CG2262	Smad on X	Smox	0.0	-6.3624	1.0	-1.2543	2.0	-1.5667	6.0	-0.7504	1.0	-2.6811	10.0	-5.0561	0.0	-3.1045	7.0	-3.7419	3.0	-2.2552	3.0	-2.114	9.0	-2.2605	22.0	-4.254	10.0	13.0	12.0	10.0	11.0	15.0	13.0	11.0	13.0	15.0	8.0	9.0	15.0	11.0	12.0	10.0	13.0	14.0	10.0	14.0	11.95	2.0894471693929497
FBgn0026060	CG4317	Multiple inositol polyphosphate phosphatase 2	Mipp2	79.0	0.3215	32.0	-0.4235	52.0	0.9603	41.0	2.3763	24.0	-0.8124	228.0	0.6138
FBgn0026136	CG8914	Casein kinase II beta2 subunit	CkIIbeta2	86.0	1.2386	71.0	0.7013	42.0	1.3096	22.0	1.7355	8.0	-1.3707	229.0	1.7585	78.0	0.0207	69.0	0.0859	44.0	0.5155	54.0	2.3994	16.0	-1.8339	261.0	0.5549	18.0	21.0	19.0	20.0	21.0	21.0	21.0	19.0	21.0	22.0	22.0	19.0	22.0	21.0	22.0	26.0	20.0	20.0	20.0	21.0	20.8	1.6733200530681507
FBgn0026174	CG12700	SKP1-related D	SkpD	55.0	-3.0125	108.0	3.9263	5.0	-2.0178	19.0	0.3303	84.0	13.678	271.0	0.7034
FBgn0026175	CG11941	SKP1-related C	SkpC	22.0	-0.9875	53.0	0.2077	27.0	-1.3255	19.0	-0.491	32.0	0.8545	153.0	-1.6462	202.0	2.2179	48.0	0.2261	7.0	-1.4092	49.0	1.8619	22.0	0.6987	328.0	3.2435	19.0	21.0	21.0	20.0	22.0	24.0	22.0	20.0	23.0	21.0	21.0	19.0	19.0	20.0	23.0	23.0	25.0	23.0	22.0	21.0	21.45	1.7006190823220502
FBgn0026176	CG8881	SKP1-related B	SkpB	174.0	4.3528	86.0	1.4527	34.0	0.7582	25.0	2.403	6.0	-1.5849	325.0	4.4381	133.0	2.8579	55.0	0.5861	5.0	-2.0882	10.0	-1.2435	20.0	-0.4186	223.0	0.8281	19.0	20.0	20.0	20.0	22.0	20.0	21.0	21.0	23.0	21.0	19.0	23.0	20.0	20.0	19.0	21.0	21.0	22.0	20.0	21.0	20.65	1.1821033884786183
FBgn0026181	CG9774	Rho kinase	Rok	97.0	1.6279	76.0	0.9518	50.0	1.861	3.0	-2.492	36.0	1.6277	262.0	2.6796	101.0	1.4233	80.0	2.8403	1.0	-2.4223	51.0	3.855	34.0	1.9256	267.0	1.9406	20.0	21.0	23.0	27.0	23.0	22.0	24.0	22.0	25.0	25.0	25.0	30.0	25.0	22.0	25.0	25.0	22.0	25.0	23.0	26.0	24.0	2.2941573387056176
FBgn0026192	CG5884	par-6	par-6	6.0	-5.8547	25.0	-0.6111	51.0	0.9097	7.0	-0.6611	3.0	-2.5186	92.0	-2.9234	116.0	0.7773	49.0	-0.498	16.0	-2.1005	7.0	-1.2832	0.0	-2.0329	188.0	-1.8325	18.0	19.0	17.0	19.0	23.0	18.0	22.0	20.0	20.0	18.0	18.0	18.0	21.0	18.0	16.0	18.0	20.0	20.0	18.0	20.0	19.05	1.7006190823220513
FBgn0026250	CG8053	eukaryotic translation initiation factor 1A	eIF1A	0.0	-1.8048	0.0	-2.8554	0.0	-1.5853	0.0	-3.1595	0.0	-2.2274	0.0	-4.6335	0.0	-1.5952	0.0	-3.865	0.0	-5.5331	0.0	-1.1749	0.0	-3.3783	0.0	-5.6078	0.0	0.0	0.0	0.0	0.0	0.0	0.0	0.0	0.0	0.0	0.0	0.0	0.0	0.0	0.0	0.0	0.0	0.0	0.0	0.0	0.0	0.0
FBgn0026252	CG7935	moleskin	msk	33.0	-2.7169	59.0	0.4533	29.0	-0.9622	21.0	-0.2522	23.0	0.1056	165.0	-1.9158	130.0	1.5437	50.0	-0.4472	39.0	0.0757	24.0	0.0	25.0	-0.2804	268.0	0.4653	20.0	21.0	23.0	15.0	18.0	21.0	23.0	24.0	20.0	18.0	22.0	23.0	21.0	20.0	21.0	26.0	20.0	19.0	24.0	18.0	20.85	2.580799549711189
FBgn0026317	CG6147	Tsc1	Tsc1	37.0	-2.5214	49.0	-0.255	19.0	-1.5636	8.0	-1.3451	3.0	-0.7746	116.0	-3.3424	181.0	1.716	72.0	1.024	27.0	-0.3575	53.0	2.2306	11.0	-0.9024	344.0	3.7741	20.0	21.0	19.0	24.0	17.0	23.0	18.0	16.0	15.0	15.0	21.0	21.0	24.0	20.0	24.0	21.0	19.0	16.0	13.0	24.0	19.55	3.3946552417773317
FBgn0026320	CG5185	Twin of m4	Tom	1.0	-8.8669	18.0	-5.3501	92.0	6.9998	38.0	3.226	6.0	-1.1438	155.0	-1.6004	66.0	-0.2279	76.0	0.4867	6.0	-4.7083	43.0	1.6713	10.0	-2.4131	201.0	-0.8618	19.0	23.0	22.0	21.0	22.0	20.0	20.0	19.0	21.0	22.0	22.0	21.0	21.0	23.0	20.0	19.0	20.0	23.0	9.0	20.0	20.35	2.9784312366712355
FBgn0026323	CG18492	TGF-beta activated kinase 1	Tak1	49.0	-0.0806	8.0	-1.2525	84.0	1.4319	31.0	0.2455	48.0	2.4442	220.0	0.5686
FBgn0026369	CG15667	Smad anchor for receptor activation	Sara	99.0	1.6986	5.0	-2.6049	33.0	0.6892	6.0	-1.8245	11.0	-1.0495	154.0	-0.335
FBgn0026371	CG7186	Sak kinase	SAK	5.0	-5.9393	93.0	1.2114	66.0	1.6678	25.0	0.947	1.0	-2.6811	190.0	-0.3745
FBgn0026379	CG5671	Phosphatase and tensin homolog	Pten	136.0	3.008	74.0	0.8516	41.0	1.2406	23.0	1.958	32.0	1.1994	306.0	3.9078	174.0	2.0095	52.0	-0.8875	24.0	-2.2339	34.0	1.0756	20.0	-1.4479	304.0	1.5702	29.0	29.0	30.0	24.0	28.0	23.0	24.0	23.0	24.0	28.0	27.0	23.0	29.0	24.0	28.0	23.0	27.0	24.0	26.0	24.0	25.85	2.4767338424456895
FBgn0026597	CG7926	Axin	Axn	64.0	4.0788	62.0	-2.3073	62.0	3.6321	52.0	0.6652	36.0	0.2896	276.0	1.1218	79.0	-2.2031	40.0	-0.2523	33.0	3.8341	5.0	-0.647	28.0	-0.0671	185.0	-2.2242	20.0	21.0	17.0	19.0	19.0	18.0	19.0	19.0	19.0	20.0	22.0	22.0	19.0	16.0	18.0	19.0	19.0	24.0	21.0	21.0	19.6	1.8467610337532774
FBgn0026598	CG6193	Adenomatous polyposis coli 2	Apc2	30.0	-2.8635	53.0	0.0283	22.0	-1.3832	2.0	-1.8495	15.0	-0.2465	122.0	-3.1677	205.0	2.2896	64.0	0.758	28.0	-0.305	41.0	1.1245	27.0	1.4264	365.0	4.4705	16.0	18.0	15.0	20.0	18.0	20.0	21.0	21.0	20.0	19.0	19.0	20.0	18.0	20.0	20.0	20.0	21.0	21.0	20.0	19.0	19.3	1.6254554017744975
FBgn0026760	CG7121	Tehao	Tehao	115.0	-1.1248	75.0	1.6431	12.0	-1.2744	10.0	-1.156	18.0	1.5606	230.0	-0.8555
FBgn0027342	CG4626	frizzled 4	fz4	110.0	2.0879	5.0	-2.6049	70.0	3.2395	11.0	-0.712	2.0	-2.0133	198.0	0.8932
FBgn0027343	CG16785	frizzled 3	fz3	78.0	0.8935	69.0	0.7268	52.0	-0.1161	40.0	0.7978	33.0	0.9538	272.0	2.2874	135.0	0.6166	3.0	-1.27	74.0	2.1137	4.0	-2.2859	40.0	3.3187	256.0	0.8556	21.0	21.0	18.0	17.0	18.0	18.0	16.0	18.0	19.0	17.0	22.0	18.0	15.0	17.0	17.0	18.0	19.0	20.0	16.0	19.0	18.2	1.794729124848356
FBgn0027363	CG6521	Signal transducing adaptor molecule	Stam	98.0	0.4593	69.0	1.1617	37.0	-0.4811	17.0	-0.5885	4.0	-0.7306	225.0	-0.1689
FBgn0027535	CG15110	brother of tout-velu	botv	77.0	0.9201	61.0	0.2004	46.0	1.5853	11.0	-0.712	16.0	-0.514	211.0	1.2561	94.0	0.3522	126.0	3.3497	44.0	0.5155	21.0	0.2151	14.0	-2.027	299.0	1.4521	21.0	22.0	21.0	22.0	17.0	18.0	19.0	21.0	20.0	20.0	18.0	18.0	20.0	21.0	20.0	18.0	21.0	21.0	19.0	20.0	19.85	1.4608937423083823
FBgn0028436	CG10610	ECSIT	ECSIT	59.0	0.2831	69.0	0.6011	7.0	-1.1028	8.0	-1.3795	49.0	3.0199	192.0	0.7257
FBgn0028990	CG11331	Serpin 27A	Spn27A	58.0	0.2217	44.0	-0.0844	20.0	-1.6641	36.0	0.5523	28.0	0.457	186.0	-0.5553
FBgn0029006	CG4943	SMAD specific E3 ubiquitin protein ligase	Smurf	141.0	5.5671	78.0	0.8094	42.0	0.4549	15.0	0.0536	36.0	0.1625	312.0	2.7985	164.0	1.8024	62.0	-0.3149	44.0	0.5155	18.0	0.0165	33.0	-0.193	321.0	1.9716	18.0	22.0	19.0	22.0	20.0	17.0	22.0	19.0	22.0	17.0	21.0	21.0	22.0	19.0	20.0	21.0	17.0	20.0	22.0	19.0	20.0	1.806421294919002
FBgn0029088	CG2019	dispatched	disp	68.0	-1.0066	62.0	0.6658	31.0	-0.8419	23.0	-0.0841	14.0	-0.2905	198.0	-0.955
FBgn0029095	CG4276	arouser	aru	80.0	5.2442	75.0	-1.8107	28.0	0.8878	36.0	-1.4634	34.0	0.0263	253.0	0.582
FBgn0029175	CG8433	sister of tout-velu	sotv	2.0	-4.2317	3.0	-3.5134	4.0	-2.4657	0.0	-2.0176	2.0	-0.8186	11.0	-6.3994	15.0	-2.2514	9.0	-1.0705	4.0	-1.5669	4.0	-2.2859	2.0	-2.2124	34.0	-6.5068	0.0	0.0	0.0	0.0	0.0	0.0	0.0	0.0	0.0	0.0	0.0	0.0	0.0	0.0	0.0	0.0	0.0	0.0	0.0	0.0	0.0	0.0
FBgn0029840	CG4320	raptor	raptor	0.0	-4.3294	0.0	-3.7259	0.0	-2.7062	0.0	-2.0176	0.0	-0.9066	0.0	-6.7197	95.0	-0.3394	43.0	0.0598	17.0	-0.8834	2.0	-2.4703	3.0	-2.0669	160.0	-2.3281	0.0	0.0	0.0	0.0	0.0	0.0	9.0	6.0	8.0	9.0	8.0	8.0	8.0	5.0	7.0	6.0	7.0	8.0	7.0	6.0	5.1	3.567396219860318
FBgn0029882	CG3226	-	CG3226	23.0	-0.954	58.0	0.3699	51.0	-0.1645	26.0	-0.0614	29.0	0.5564	187.0	-0.5223
FBgn0030018	CG2272	slipper	slpr	85.0	-0.1759	65.0	0.8784	25.0	-1.2028	5.0	-1.5973	39.0	0.8098	219.0	-0.3436
FBgn0030310	CG11709	Peptidoglycan recognition protein SA	PGRP-SA	155.0	3.6804	75.0	0.9017	45.0	1.5163	11.0	-0.712	27.0	0.6639	313.0	4.1032
FBgn0030366	CG1490	Ubiquitin-specific protease 7	Usp7	53.0	0.0708	51.0	-0.3006	26.0	0.2068	23.0	1.958	8.0	-1.3707	161.0	-0.1396
FBgn0030530	CG11063	Ajuba LIM protein	jub	1.0	-1.6929	0.0	-1.5121	6.0	-2.3414	2.0	-1.5343	0.0	-2.3249	9.0	-6.4061	0.0	-2.6099	5.0	-1.2035	22.0	-0.6205	12.0	-1.5485	2.0	-2.2124	41.0	-6.2747	17.0	17.0	21.0	18.0	23.0	21.0	20.0	22.0	18.0	19.0	21.0	22.0	19.0	20.0	20.0	21.0	22.0	20.0	21.0	18.0	20.0	1.7471781760734562
FBgn0030869	CG8146	Suppressor of Cytokine Signaling at 16D	Socs16D	102.0	1.8048	66.0	0.4508	4.0	-1.3096	43.0	6.4079	2.0	-2.0133	217.0	1.4235	58.0	-0.3936	53.0	-0.8303	42.0	0.2406	34.0	1.0756	3.0	-3.0887	190.0	-1.1216	17.0	18.0	22.0	20.0	19.0	15.0	22.0	22.0	19.0	17.0	20.0	22.0	21.0	23.0	21.0	18.0	20.0	23.0	21.0	22.0	20.1	2.221900561515559
FBgn0030904	CG5988	unpaired 2	upd2	0.0	-1.7265	0.0	-1.5121	0.0	-2.6317	0.0	-1.657	0.0	-2.3249	0.0	-6.7036	0.0	-2.6099	0.0	-1.3698	0.0	-1.7772	0.0	-2.6546	0.0	-2.5036	0.0	-7.6344	12.0	16.0	0.0	0.0	11.0	17.0	15.0	13.0	10.0	13.0	19.0	23.0	12.0	14.0	11.0	10.0	18.0	12.0	11.0	14.0	12.55	5.4238750955964665
FBgn0030941	CG6531	wengen	wgn	83.0	1.1324	53.0	-0.2004	4.0	-1.3096	25.0	2.403	4.0	-1.7991	169.0	0.0837
FBgn0030964	CG7103	PDGF- and VEGF-related factor 1	Pvf1	35.0	-3.4012	78.0	0.8094	30.0	-0.1516	30.0	1.3936	20.0	-1.1374	193.0	-0.2965
FBgn0031005	CG7890	Heparan sulfate 3-O sulfotransferase-B	Hs3st-B	76.0	0.8847	67.0	0.5009	28.0	0.3446	9.0	-1.157	4.0	-1.7991	184.0	0.5024
FBgn0031006	CG8002	rapamycin-insensitive companion of Tor	rictor	46.0	-2.4705	70.0	0.595	46.0	0.657	11.0	-0.3037	37.0	0.2437	210.0	0.1456
FBgn0031030	CG14217	Tao	Tao	3.0	-1.6258	146.0	3.2253	8.0	-2.2447	34.0	0.4296	25.0	0.159	216.0	0.4363
FBgn0031055	CG14225	eye transformer	et	13.0	-1.3448	70.0	0.6512	56.0	2.2745	30.0	3.5155	20.0	-0.0857	189.0	0.642
FBgn0031074	CG11942	SKP1-related E	SkpE	129.0	2.7603	74.0	0.8516	24.0	0.0689	1.0	-2.937	11.0	-1.0495	239.0	2.0376	1.0	-1.5745	95.0	1.5746	20.0	-2.7837	12.0	-0.3806	21.0	-1.3513	149.0	-2.0896	23.0	21.0	18.0	20.0	20.0	18.0	20.0	19.0	20.0	23.0	21.0	21.0	21.0	21.0	19.0	20.0	21.0	19.0	21.0	21.0	20.35	1.3484884325167863
FBgn0031441	CG9962	-	CG9962	161.0	3.8927	51.0	-0.3006	11.0	-0.8271	51.0	8.1879	2.0	-2.0133	276.0	3.0704	174.0	1.5487	31.0	-0.3391	40.0	0.326	37.0	0.7558	5.0	-1.7758	287.0	1.8837	16.0	16.0	20.0	19.0	19.0	22.0	20.0	22.0	19.0	19.0	23.0	19.0	17.0	22.0	21.0	20.0	20.0	22.0	19.0	20.0	19.75	1.9432745018328434
FBgn0031450	CG2903	Hepatocyte growth factor regulated tyrosine kinase substrate	Hrs	21.0	-3.3033	5.0	-3.3717	5.0	-2.4055	0.0	-2.0176	4.0	-0.7306	35.0	-5.7007	21.0	-2.108	19.0	-0.7381	8.0	-1.3566	17.0	-1.0877	13.0	-0.6113	78.0	-5.0476	19.0	19.0	21.0	24.0	21.0	25.0	22.0	19.0	22.0	21.0	20.0	23.0	19.0	20.0	19.0	17.0	20.0	22.0	18.0	17.0	20.4	2.161870535098324
FBgn0031458	CG2855	anterior pharynx defective 1	aph-1	30.0	-3.8242	24.0	-0.6379	2.0	-1.5667	17.0	0.2323	11.0	-1.8686	84.0	-3.1314	38.0	-1.7235	33.0	-1.9836	50.0	4.1317	26.0	0.4616	5.0	-2.6255	152.0	-0.9377	19.0	18.0	14.0	16.0	17.0	16.0	19.0	19.0	18.0	16.0	18.0	21.0	19.0	13.0	19.0	18.0	19.0	19.0	18.0	15.0	17.55	1.9861361590045286
FBgn0031463	CG15400	Glucose-6-Phosphatase	G6P	62.0	0.3893	72.0	0.7514	35.0	0.8271	26.0	2.6255	16.0	-0.514	211.0	1.2561	136.0	1.2223	55.0	-0.7157	43.0	0.378	31.0	0.877	31.0	-0.3861	296.0	1.3813	18.0	21.0	20.0	23.0	21.0	19.0	21.0	20.0	20.0	16.0	22.0	20.0	22.0	25.0	18.0	21.0	19.0	21.0	20.0	21.0	20.4	1.9303667499917432
FBgn0031872	CG9211	interference hedgehog	ihog	102.0	1.8048	84.0	1.3525	30.0	0.4825	13.0	-0.267	36.0	1.6277	265.0	2.7634	158.0	1.1663	35.0	-0.2061	41.0	0.3786	42.0	1.2167	22.0	0.6987	298.0	2.2485	20.0	18.0	20.0	18.0	19.0	20.0	20.0	19.0	17.0	19.0	18.0	21.0	18.0	19.0	20.0	21.0	17.0	19.0	20.0	19.0	19.1	1.1652874052533588
FBgn0031888	CG13780	PDGF- and VEGF-related factor 2	Pvf2	35.0	-5.2259	58.0	3.4205	62.0	3.7591	24.0	0.2547	4.0	-1.3924	183.0	-0.3693
FBgn0031902	CG4969	Wnt oncogene analog 6	Wnt6	86.0	0.9137	67.0	0.5146	41.0	0.4043	4.0	-0.9291	24.0	-0.8124	222.0	0.4578
FBgn0031903	CG4971	Wnt oncogene analog 10	Wnt10	76.0	0.8847	82.0	1.2524	34.0	0.7582	3.0	-2.492	45.0	2.5915	240.0	2.0655	108.0	1.7372	54.0	0.4959	38.0	0.6682	31.0	1.3679	39.0	2.7628	270.0	2.0164	20.0	20.0	18.0	19.0	19.0	22.0	15.0	19.0	15.0	21.0	17.0	20.0	17.0	19.0	19.0	19.0	18.0	19.0	17.0	18.0	18.55	1.7614288458371987
FBgn0031959	CG7104	spatzle 3	spz3	38.0	-0.4601	73.0	0.8015	21.0	-0.1378	7.0	-1.602	2.0	-2.0133	141.0	-0.6978
FBgn0032006	CG8222	PDGF- and VEGF-receptor related	Pvr	166.0	3.8494	65.0	0.597	75.0	0.9966	62.0	2.148	32.0	0.8545	400.0	6.5185	167.0	1.3814	69.0	0.9243	15.0	-0.9885	42.0	1.2167	6.0	-1.6302	299.0	2.2817	16.0	19.0	19.0	16.0	19.0	19.0	18.0	18.0	18.0	20.0	18.0	20.0	18.0	19.0	19.0	23.0	20.0	19.0	18.0	21.0	18.85	1.5652475842498519
FBgn0032061	CG9314	-	CG9314	99.0	1.6986	78.0	1.052	15.0	-0.5514	16.0	0.4005	14.0	-0.7282	222.0	1.5631	84.0	0.145	87.0	1.1166	17.0	-3.1961	30.0	0.8108	20.0	-1.4479	238.0	0.0118	18.0	16.0	17.0	13.0	19.0	15.0	20.0	22.0	16.0	19.0	16.0	18.0	19.0	17.0	19.0	17.0	16.0	19.0	15.0	17.0	17.4	2.0621909656836745
FBgn0032230	CG13139	lowfat	lft	87.0	1.274	50.0	-0.3507	27.0	0.2757	3.0	-2.492	49.0	3.0199	216.0	1.3956	162.0	1.2619	65.0	0.7913	24.0	-0.5153	14.0	-1.3642	13.0	-0.6113	278.0	1.5853	18.0	21.0	20.0	21.0	19.0	21.0	22.0	18.0	21.0	20.0	17.0	19.0	21.0	19.0	20.0	21.0	19.0	18.0	19.0	20.0	19.7	1.341640786499874
FBgn0032362	CG14928	spatzle 4	spz4	115.0	2.2649	83.0	1.3024	43.0	1.3785	17.0	0.623	40.0	2.0561	298.0	3.6845
FBgn0033153	CG11086	Growth arrest and DNA damage-inducible 45	Gadd45	140.0	3.1496	107.0	2.5047	45.0	1.5163	37.0	5.0729	10.0	-1.1566	339.0	4.8289	98.0	0.4351	66.0	-0.0859	25.0	-2.0964	26.0	0.5461	26.0	-0.8687	241.0	0.0826	21.0	20.0	20.0	20.0	20.0	25.0	24.0	20.0	21.0	21.0	20.0	19.0	20.0	18.0	21.0	20.0	20.0	22.0	20.0	18.0	20.5	1.6701717529076234
FBgn0033266	CG2160	Suppressor of Cytokine Signaling at 44A	Socs44A	154.0	6.667	39.0	-0.2358	43.0	0.5054	9.0	-0.4824	32.0	-0.1625	277.0	1.8882	131.0	1.5985	56.0	-0.1423	28.0	-0.9651	36.0	0.9058	37.0	0.5608	288.0	1.0397	22.0	25.0	25.0	22.0	26.0	20.0	25.0	22.0	25.0	29.0	25.0	23.0	20.0	25.0	26.0	23.0	25.0	21.0	24.0	24.0	23.85	2.2307657406087453
FBgn0033272	CG8707	Ras-related GTP binding C/D	RagC-D	96.0	0.3616	61.0	0.595	50.0	0.3007	36.0	1.0088	17.0	-0.1584	260.0	0.8502
FBgn0033378	CG8781	tsunagi	tsu	0.0	-6.3624	0.0	-1.2811	0.0	-1.6678	0.0	-1.2864	0.0	-2.7623	0.0	-5.3162	113.0	1.9613	42.0	-0.5861	28.0	-0.1671	28.0	0.9948	24.0	0.2512	235.0	1.1315	19.0	18.0	18.0	19.0	19.0	17.0	18.0	18.0	18.0	19.0	19.0	21.0	19.0	17.0	20.0	19.0	18.0	19.0	18.0	17.0	18.5	0.9999999999999998
FBgn0033402	CG2078	Myd88	Myd88	89.0	0.0195	42.0	-0.7508	56.0	0.6615	25.0	0.0841	30.0	0.4137	242.0	0.3261
FBgn0033483	CG12919	eiger	egr	134.0	2.7745	70.0	0.7593	39.0	-0.745	35.0	0.491	33.0	0.9538	311.0	3.5766	162.0	1.2619	44.0	0.0931	14.0	-1.0411	33.0	0.3871	4.0	-1.9213	257.0	0.8888	21.0	19.0	21.0	19.0	21.0	20.0	19.0	18.0	19.0	21.0	22.0	17.0	18.0	20.0	19.0	22.0	20.0	18.0	17.0	21.0	19.6	1.5355437918998283
FBgn0033649	CG13194	pyramus	pyr	7.0	-1.5571	13.0	-2.2041	3.0	-1.3785	0.0	-3.1595	0.0	-2.2274	23.0	-3.9915	0.0	-1.5952	0.0	-3.865	0.0	-5.5331	0.0	-1.1749	0.0	-3.3783	0.0	-5.6078	19.0	19.0	21.0	21.0	19.0	20.0	18.0	19.0	21.0	19.0	21.0	21.0	20.0	16.0	19.0	18.0	18.0	21.0	19.0	20.0	19.45	1.3562719801759993
FBgn0033652	CG12443	thisbe	ths	95.0	1.5571	34.0	-1.1522	48.0	1.7231	16.0	0.4005	3.0	-1.9062	196.0	0.8374
FBgn0033791	CG3915	Derailed 2	Drl-2	50.0	-2.1321	35.0	-0.3431	60.0	1.3646	5.0	-0.8398	25.0	-0.7312	175.0	-0.7647
FBgn0034328	CG15066	Immune induced molecule 23	IM23	143.0	6.3396	16.0	-5.7886	26.0	-0.1296	36.0	2.8015	58.0	5.321	279.0	3.8515	130.0	2.7234	41.0	-0.6763	26.0	-0.3341	20.0	0.0	19.0	-0.5861	236.0	1.1567	20.0	20.0	19.0	18.0	18.0	21.0	18.0	22.0	18.0	19.0	17.0	20.0	19.0	20.0	18.0	19.0	19.0	19.0	21.0	21.0	19.3	1.3018205875255098
FBgn0034356	CG10924	Phosphoenolpyruvate carboxykinase 2	Pepck2	154.0	3.4463	57.0	0.3375	27.0	-1.3255	46.0	1.1661	34.0	1.0532	318.0	3.808	174.0	1.5487	60.0	0.625	23.0	-0.5679	20.0	-0.8111	31.0	2.0087	308.0	2.5802	23.0	21.0	20.0	19.0	21.0	22.0	21.0	21.0	25.0	21.0	23.0	23.0	21.0	24.0	22.0	21.0	20.0	20.0	24.0	21.0	21.65	1.5652475842498532
FBgn0034863	CG12227	SKP1-related F	SkpF	126.0	2.6541	32.0	-1.2524	55.0	2.2056	37.0	5.0729	18.0	-0.2998	268.0	2.8471	67.0	-0.1215	70.0	1.6498	51.0	4.2957	34.0	1.2644	6.0	-2.3778	228.0	1.2755	19.5	21.5	21.0	20.5	20.0	21.0	22.5	21.5	20.0	22.5	23.0	20.5	21.5	20.0	21.5	21.5	21.0	20.0	21.0	22.0	21.07894736842105	1.363254828300557
FBgn0034904	CG15800	-	CG15800	112.0	3.0199	54.0	2.5435	41.0	1.4907	17.0	-1.231	3.0	-1.5167	227.0	1.5652	105.0	0.5801	48.0	-1.1166	30.0	-1.4091	45.0	1.8037	44.0	0.8687	272.0	0.8146	19.0	19.0	19.0	22.0	18.0	20.0	23.0	20.0	22.0	21.0	22.0	22.0	19.0	20.0	20.0	23.0	21.0	18.0	20.0	19.0	20.35	1.5652475842498532
FBgn0034970	CG4005	yorkie	yki	10.0	-5.5163	19.0	-0.7719	13.0	-1.0108	1.0	-1.1971	8.0	-2.1124	51.0	-3.9897	0.0	-5.5728	4.0	-2.7849	0.0	-3.6144	1.0	-1.7362	1.0	-1.9628	6.0	-7.0598	17.0	14.0	18.0	14.0	14.0	19.0	19.0	18.0	19.0	17.0	22.0	16.0	17.0	19.0	18.0	17.0	0.0	0.0	19.0	17.0	15.7	5.713326987242889
FBgn0035056	CG9196	spatzle 6	spz6	137.0	3.0434	60.0	0.1503	31.0	0.5514	48.0	7.5204	40.0	2.0561	316.0	4.1869	7.0	-1.4502	206.0	7.9305	80.0	5.4644	43.0	1.6713	56.0	2.027	392.0	3.648	22.0	21.0	20.0	16.0	20.0	22.0	22.0	24.0	21.0	20.0	23.0	23.0	23.0	21.0	23.0	21.0	24.0	22.0	20.0	21.0	21.45	1.8202082009311022
FBgn0035142	CG17090	Homeodomain interacting protein kinase	Hipk	48.0	-0.1062	56.0	-0.0501	30.0	0.4825	7.0	-1.602	65.0	4.7333	206.0	1.1165	84.0	0.6612	76.0	2.4796	20.0	-0.8353	36.0	1.9897	17.0	-0.9209	233.0	1.0809	19.0	19.0	23.0	21.0	20.0	20.0	21.0	20.0	19.0	19.0	23.0	21.0	21.0	22.0	19.0	19.0	21.0	20.0	19.0	19.0	20.25	1.332784974957958
FBgn0035379	CG9972	spatzle 5	spz5	35.0	-0.5662	47.0	-0.5009	31.0	0.5514	20.0	1.2905	23.0	0.2356	156.0	-0.2791
FBgn0035709	CG10124	eukaryotic translation initiation factor 4E4	eIF4E4	134.0	2.9372	87.0	1.5028	57.0	2.3434	37.0	5.0729	30.0	0.9852	345.0	4.9964	158.0	1.6781	101.0	1.9182	50.0	1.3403	38.0	1.3404	24.0	-1.0618	371.0	3.1522	20.0	18.0	22.0	17.0	20.0	18.0	18.0	19.0	20.0	18.0	18.0	19.0	20.0	18.0	18.0	20.0	17.0	18.0	20.0	20.0	18.9	1.293709476863455
FBgn0035719	CG14821	target of wingless	tow	199.0	5.2375	26.0	-1.5529	53.0	2.0677	27.0	2.848	23.0	0.2356	328.0	4.5219	125.0	0.9944	54.0	-0.773	39.0	-0.1718	27.0	0.6123	34.0	-0.0965	279.0	0.9799	23.0	18.0	18.0	21.0	21.0	19.0	18.0	21.0	20.0	21.0	21.0	25.0	18.0	19.0	24.0	21.0	18.0	21.0	21.0	19.0	20.35	2.0332758116683998
FBgn0036046	CG8167	Insulin-like peptide 2	Ilp2	109.0	2.8597	75.0	0.729	36.0	0.1516	31.0	1.483	22.0	-0.9749	273.0	1.7842	107.0	0.6215	83.0	0.8875	49.0	1.2029	34.0	1.0756	36.0	0.0965	309.0	1.6882	25.0	20.0	21.0	22.0	27.0	22.0	26.0	22.0	21.0	22.0	24.0	22.0	23.0	22.0	25.0	22.0	24.0	26.0	22.0	24.0	23.1	1.9166857359844662
FBgn0036141	CG6210	wntless	wls	91.0	0.771	65.0	4.9554	31.0	0.4105	6.0	-3.5656	5.0	-1.2681	198.0	0.2902
FBgn0036196	CG11658	-	CG11658	0.0	-1.7265	0.0	-1.5121	1.0	-2.5833	0.0	-1.657	0.0	-2.3249	1.0	-6.6706	34.0	-1.7973	3.0	-1.27	2.0	-1.6721	0.0	-2.6546	0.0	-2.5036	39.0	-6.341	19.0	20.0	18.0	20.0	18.0	18.0	18.0	18.0	19.0	17.0	18.0	19.0	16.0	18.0	17.0	20.0	19.0	20.0	19.0	18.0	18.45	1.0990426455975695
FBgn0036255	CG10861	Autophagy-related 12	Atg12	81.0	5.317	70.0	-2.0017	41.0	1.9371	42.0	-0.6652	33.0	-0.1053	267.0	0.9106
FBgn0036318	CG11009	WW domain binding protein 2	Wbp2	102.0	1.949	60.0	3.8591	30.0	0.3025	28.0	1.1036	9.0	-0.7708	229.0	1.6532	67.0	-0.1009	36.0	-1.1271	36.0	0.5012	34.0	1.741	23.0	0.0837	196.0	0.1454	22.0	23.0	21.0	21.0	22.0	23.0	23.0	21.0	19.0	22.0	20.0	21.0	22.0	23.0	24.0	22.0	21.0	20.0	25.0	22.0	21.85	1.4244112357114609
FBgn0036690	CG14059	Insulin-like peptide 8	Ilp8	48.0	-0.1062	71.0	0.7013	15.0	-0.5514	2.0	-2.7145	1.0	-2.1203	137.0	-0.8095
FBgn0036827	CG6843	-	CG6843	0.0	-8.974	75.0	7.148	19.0	-0.8858	4.0	-3.9901	1.0	-1.7654	99.0	-4.0626	130.0	1.098	15.0	-3.0061	37.0	-0.4468	32.0	0.9432	30.0	-0.4826	244.0	0.1535	20.0	22.0	21.0	21.0	19.0	19.0	19.0	19.0	18.0	18.0	19.0	18.0	17.0	21.0	18.0	18.0	18.0	19.0	20.0	22.0	19.3	1.4545753585442778
FBgn0036974	CG5605	eukaryotic translation release factor 1	eRF1	0.0	-8.974	0.0	-9.2968	0.0	-2.9382	0.0	-4.839	0.0	-1.8897	0.0	-8.4153	0.0	-1.5952	0.0	-3.865	0.0	-5.5331	0.0	-1.1749	0.0	-3.3783	0.0	-5.6078	0.0	0.0	23.0	13.0	12.0	10.0	0.0	0.0	0.0	0.0	0.0	0.0	19.0	16.0	0.0	0.0	0.0	0.0	20.0	14.0	6.35	8.424744256621306
FBgn0037007	CG5059	-	CG5059	143.0	-0.2438	65.0	0.9513	29.0	0.531	28.0	1.8166	13.0	0.6426	278.0	0.9696
FBgn0037218	CG1107	auxilin	aux	0.0	-4.3294	0.0	-3.7259	0.0	-2.7062	0.0	-2.0176	2.0	-0.8186	2.0	-6.6615	0.0	-3.8227	8.0	-4.4386	2.0	-3.7382	1.0	-2.0472	1.0	-3.6163	12.0	-5.0146	22.0	19.0	21.0	17.0	22.0	19.0	18.0	23.0	20.0	20.0	20.0	19.0	22.0	20.0	20.0	22.0	22.0	20.0	24.0	19.0	20.45	1.761428845837199
FBgn0037236	CG9772	S-phase kinase-associated protein 2	Skp2	43.0	-2.2282	31.0	-1.53	40.0	-0.3007	19.0	-0.4203	22.0	0.0616	155.0	-2.2069	122.0	1.1058	73.0	0.7216	25.0	-1.249	30.0	0.4529	16.0	-0.9113	266.0	0.4079	20.0	20.0	17.0	20.0	22.0	21.0	21.0	23.0	23.0	21.0	22.0	17.0	21.0	18.0	23.0	20.0	24.0	22.0	23.0	19.0	20.85	2.007223796297028
FBgn0037248	CG9809	spargel	srl	95.0	1.6752	40.0	-0.209	30.0	-0.1516	33.0	1.6616	19.0	-1.2187	217.0	0.3277
FBgn0037325	CG12147	-	CG12147	169.0	4.1758	83.0	1.3024	74.0	3.5152	22.0	1.7355	15.0	-0.6211	363.0	5.4988	120.0	0.8908	78.0	0.6012	44.0	0.5155	38.0	1.3404	33.0	-0.193	313.0	1.7827	19.0	19.0	20.0	20.0	20.0	23.0	18.0	19.0	21.0	18.0	21.0	20.0	21.0	21.0	22.0	18.0	20.0	21.0	18.0	22.0	20.05	1.4680814547887788
FBgn0037351	CG1475	Ribosomal protein L13A	RpL13A	0.0	-1.8048	0.0	-2.8554	0.0	-1.5853	0.0	-3.1595	0.0	-2.2274	0.0	-4.6335	0.0	-3.8227	0.0	-5.2242	0.0	-4.0661	0.0	-2.1475	0.0	-3.8639	0.0	-5.3641	0.0	0.0	0.0	0.0	0.0	0.0	0.0	0.0	0.0	0.0	0.0	0.0	0.0	0.0	0.0	0.0	0.0	0.0	0.0	0.0	0.0	0.0
FBgn0037364	CG2108	Rab23	Rab23	75.0	-0.0169	63.0	0.4074	36.0	0.1516	9.0	-0.4824	32.0	-0.1625	215.0	0.2757
FBgn0037647	CG11968	Ras-related GTP binding A/B	RagA-B	46.0	-0.1814	115.0	2.2194	29.0	-1.2288	12.0	-0.9206	16.0	-0.7352	218.0	0.5024
FBgn0037657	CG11990	hyrax	hyx	90.0	0.6639	69.0	5.8324	24.0	-0.3457	32.0	1.9526	23.0	0.9697	238.0	2.0489	162.0	1.7609	103.0	2.0327	80.0	5.4644	30.0	0.8108	46.0	1.0618	421.0	4.3328	18.0	20.0	25.0	23.0	19.0	22.0	24.0	23.0	20.0	20.0	24.0	22.0	21.0	19.0	21.0	18.0	20.0	19.0	20.0	20.0	20.9	2.04939015319192
FBgn0037671	CG8444	ATPase H+ transporting accessory protein 2	ATP6AP2	0.0	-1.8048	3.0	-2.7051	11.0	-0.8271	0.0	-3.1595	4.0	-1.7991	18.0	-4.1311
FBgn0037679	CG8866	Another Drosophila Unc-51-like kinase	Aduk	70.0	-0.44	55.0	0.193	5.0	-1.4151	6.0	-0.7504	16.0	-1.4624	152.0	-1.3629	178.0	4.1714	82.0	1.179	48.0	0.9273	34.0	0.7549	32.0	0.2103	374.0	3.5098	21.0	21.0	22.0	23.0	21.0	24.0	25.0	25.0	22.0	24.0	26.0	20.0	19.0	21.0	22.0	28.0	19.0	22.0	21.0	22.0	22.4	2.326053807586891
FBgn0037834	CG6554	Arginine methyltransferase 1	Art1	49.0	-2.2167	24.0	-0.6379	7.0	-1.314	9.0	-0.4824	11.0	-1.8686	100.0	-2.7153	146.0	2.4196	52.0	-0.3456	36.0	-0.2082	8.0	-1.2078	29.0	0.0	271.0	0.5515	21.0	22.0	23.0	25.0	21.0	24.0	21.0	23.0	22.0	23.0	18.0	25.0	23.0	25.0	19.0	21.0	20.0	21.0	20.0	24.0	22.05	2.0124611797498106
FBgn0038134	CG8458	wnt inhibitor of Dorsal	wntD	45.0	-2.1305	79.0	1.87	4.0	-2.4657	57.0	2.7742	23.0	0.1056	208.0	-0.6638
FBgn0038167	CG9374	Lkb1 kinase	Lkb1	152.0	6.4978	60.0	0.327	40.0	0.3538	42.0	2.4657	10.0	-1.9499	304.0	2.5905	129.0	1.489	76.0	0.8741	48.0	0.9273	6.0	-1.3587	30.0	0.0701	289.0	1.0685	21.0	22.0	25.0	22.0	21.0	21.0	21.0	21.0	25.0	25.0	21.0	25.0	26.0	23.0	21.0	20.0	22.0	23.0	26.0	24.0	22.75	1.9701723141310308
FBgn0038197	CG3143	forkhead box, sub-group O	foxo	30.0	-0.7188	83.0	1.1811	70.0	0.7547	26.0	-0.0614	26.0	0.2583	235.0	1.0644	191.0	1.955	38.0	-0.1064	10.0	-1.2514	2.0	-2.4703	34.0	2.4453	275.0	1.4858	21.0	23.0	22.0	20.0	20.0	20.0	24.0	22.0	22.0	24.0	21.0	21.0	20.0	19.0	20.0	21.0	16.0	24.0	20.0	22.0	21.1	1.9166857359844656
FBgn0038390	CG5083	Retinoblastoma-family protein 2	Rbf2	41.0	-2.8935	9.0	-1.0399	43.0	0.5054	30.0	1.3936	5.0	-2.3561	128.0	-1.9871	85.0	0.8728	45.0	-0.8052	32.0	1.1805	27.0	0.562	28.0	3.0713	217.0	0.9552	19.5	20.0	22.0	23.0	20.0	22.0	22.0	20.5	18.0	21.0	21.5	20.5	21.5	20.0	20.5	20.5	20.0	21.5	20.5	20.0	20.725	1.679247389419378
FBgn0038539	CG12334	Autophagy-related 8b	Atg8b	110.0	1.9684	70.0	0.7593	54.0	-0.0194	40.0	0.7978	37.0	1.3512	311.0	3.5766	190.0	1.9311	37.0	-0.1396	45.0	0.5889	24.0	-0.4424	26.0	1.2809	322.0	3.0445	19.0	21.0	19.0	19.0	18.0	19.0	18.0	22.0	16.0	20.0	20.0	21.0	18.0	18.0	22.0	23.0	22.0	23.0	16.0	17.0	19.55	2.1636956688426454
FBgn0038755	CG4451	Heparan sulfate 6-O-sulfotransferase	Hs6st	148.0	3.4327	77.0	1.0019	34.0	0.7582	32.0	3.9604	23.0	0.2356	314.0	4.1311	86.0	0.1865	56.0	-0.6585	24.0	-2.2339	30.0	0.8108	27.0	-0.7722	223.0	-0.3424	20.0	18.0	21.0	22.0	22.0	20.0	19.0	18.0	22.0	21.0	21.0	19.0	20.0	21.0	19.0	18.0	22.0	19.0	21.0	19.0	20.1	1.4104870379448817
FBgn0038965	CG13852	mob as tumor suppressor	mats	82.0	-2.163	39.0	-0.8475	17.0	-0.7434	2.0	-2.4772	11.0	0.2754	151.0	-3.8594	8.0	-2.7458	82.0	3.0206	33.0	0.2506	21.0	0.1244	21.0	-0.2512	165.0	-0.6384	21.0	23.0	20.0	22.0	21.0	18.0	23.0	20.0	20.0	21.0	21.0	17.0	18.0	22.0	18.0	18.0	22.0	26.0	22.0	24.0	20.85	2.3004576203785834
FBgn0039015	CG4803	Tak1-like 2	Takl2	21.0	-4.5857	57.0	0.2466	30.0	-0.1516	17.0	0.2323	20.0	-1.1374	145.0	-1.5449	105.0	0.1752	60.0	0.061	31.0	-0.6812	14.0	-0.7549	26.0	-0.2103	236.0	-0.4538	21.0	23.0	20.0	23.0	25.0	23.0	22.0	23.0	22.0	20.0	22.0	25.0	22.0	21.0	24.0	27.0	28.0	20.0	16.0	22.0	22.45	2.6452539426400317
FBgn0039044	CG33336	p53	p53	33.0	-0.6181	175.0	4.1663	60.0	0.2709	27.0	0.0	49.0	2.5435	344.0	4.6674	146.0	0.8795	18.0	-0.7713	54.0	1.0621	6.0	-2.1016	3.0	-2.0669	227.0	-0.1061	18.0	18.0	18.0	20.0	20.0	20.0	21.0	18.0	18.0	18.0	22.0	21.0	18.0	20.0	22.0	20.0	18.0	19.0	18.0	20.0	19.35	1.4244112357114618
FBgn0039055	CG4656	Ras association family member	Rassf	17.0	-3.4987	60.0	0.5242	32.0	-0.7818	7.0	-1.4291	22.0	0.0616	138.0	-2.7019	118.0	0.8868	55.0	-0.1931	43.0	0.4542	19.0	-0.3774	38.0	0.6309	273.0	0.6089	21.0	21.0	18.0	20.0	18.0	20.0	20.0	18.0	18.0	20.0	18.0	21.0	19.0	17.0	19.0	17.0	24.0	19.0	19.0	19.0	19.3	1.6575187543592473
FBgn0039102	CG16705	Spatzle-Processing Enzyme	SPE	0.0	-8.974	0.0	-9.2968	0.0	-2.9382	0.0	-4.839	0.0	-1.8897	0.0	-8.4153	0.0	-3.1045	0.0	-4.3731	0.0	-2.5058	0.0	-2.4871	0.0	-3.7675	0.0	-4.8103	0.0	0.0	0.0	0.0	0.0	0.0	0.0	0.0	0.0	0.0	0.0	0.0	0.0	0.0	0.0	0.0	0.0	0.0	13.0	9.0	1.1	3.447348332605191
FBgn0039234	CG7012	Nicastrin	Nct	77.0	-0.5668	35.0	-1.2467	56.0	0.6615	40.0	1.3451	14.0	-0.2905	222.0	-0.2562
FBgn0039532	CG5588	Mig-2-like	Mtl	2.0	-1.6593	103.0	1.8301	20.0	-1.6641	31.0	0.2455	35.0	1.1525	191.0	-0.3901
FBgn0039622	CG1442	eukaryotic translation initiation factor 4E6	eIF4E6	104.0	1.8756	63.0	0.3006	2.0	-1.4474	2.0	-2.7145	0.0	-2.2274	171.0	0.1396
FBgn0039709	CG31009	Cadherin 99C	Cad99C	115.0	3.3412	43.0	0.1316	5.0	-2.3981	12.0	-2.2922	34.0	2.3373	209.0	0.7738
FBgn0039734	CG7908	Tace	Tace	77.0	0.9201	55.0	-0.1002	34.0	0.7582	4.0	-2.2695	18.0	-0.2998	188.0	0.6141
FBgn0039907	CG2041	legless	lgs	55.0	-1.709	69.0	0.5682	29.0	-0.2022	29.0	1.3043	28.0	-0.4875	210.0	0.1456
FBgn0040078	CG4003	pontin	pont	61.0	-1.3487	76.0	1.6575	47.0	0.1203	31.0	0.5885	31.0	0.4577	246.0	0.4425
FBgn0040281	CG1200	APP-like protein interacting protein 1	Aplip1	54.0	-1.6907	65.0	0.8784	14.0	-1.8643	4.0	-1.6813	21.0	0.0176	158.0	-2.1196	189.0	1.9072	56.0	0.4921	43.0	0.4837	22.0	-0.6268	21.0	0.5531	331.0	3.343	22.0	21.0	21.0	20.0	21.0	20.0	20.0	19.0	19.0	21.0	19.0	20.0	20.0	21.0	22.0	20.0	17.0	20.0	22.0	18.0	20.15	1.3088765773505306
FBgn0040291	CG16988	Regulator of cullins 1b	Roc1b	71.0	0.6584	57.0	0.3375	33.0	-1.0353	10.0	-1.0433	21.0	-0.2385	192.0	-0.357
FBgn0040296	CG3396	Ocho	Ocho	0.0	-4.3294	0.0	-3.7259	0.0	-2.7062	0.0	-2.0176	0.0	-0.9066	0.0	-6.7197	0.0	-3.1045	0.0	-4.3731	0.0	-2.5058	0.0	-2.4871	0.0	-3.7675	0.0	-4.8103	0.0	0.0	0.0	0.0	0.0	0.0	0.0	0.0	0.0	0.0	0.0	0.0	0.0	0.0	0.0	0.0	0.0	0.0	0.0	0.0	0.0	0.0
FBgn0040388	CG32796	brother of ihog	boi	92.0	1.4509	68.0	0.551	19.0	-0.2757	6.0	-1.8245	21.0	0.0214	206.0	1.1165	190.0	1.9311	41.0	-0.0066	40.0	0.326	12.0	-1.5485	21.0	0.5531	304.0	2.4475	21.0	21.0	16.0	17.0	16.0	16.0	21.0	18.0	16.0	20.0	19.0	16.0	22.0	17.0	11.0	17.0	20.0	19.0	21.0	18.0	18.1	2.653696528082647
FBgn0040736	CG16844	Immune induced molecule 3	IM3	160.0	3.8573	69.0	0.6011	59.0	2.4813	23.0	1.958	29.0	0.8781	340.0	4.8568
FBgn0041184	CG15154	Suppressor of cytokine signaling at 36E	Socs36E	30.0	-0.7432	27.0	-1.5028	18.0	-0.3446	49.0	7.7429	14.0	-0.7282	138.0	-0.7816
FBgn0041191	CG1081	Ras homolog enriched in brain	Rheb	3.0	-6.1086	21.0	-0.7183	2.0	-1.5667	1.0	-1.1971	5.0	-2.3561	32.0	-4.4839	51.0	-2.7809	15.0	-2.2259	1.0	-3.5198	4.0	-1.5097	4.0	-1.7525	75.0	-5.078	19.0	20.0	18.0	16.0	19.0	18.0	16.0	16.0	17.0	18.0	17.0	18.0	18.0	16.0	16.0	20.0	18.0	19.0	17.0	20.0	17.8	1.3992479182911455
FBgn0041205	CG16910	kenny	key	108.0	1.9012	78.0	1.0189	40.0	-0.6966	14.0	-0.7978	53.0	2.9409	293.0	2.9816	162.0	1.2619	55.0	0.4588	13.0	-1.0937	22.0	-0.6268	35.0	2.5909	287.0	1.8837	23.0	23.0	23.0	22.0	20.0	22.0	20.0	22.0	21.0	18.0	21.0	19.0	20.0	23.0	22.0	18.0	24.0	23.0	20.0	19.0	21.15	1.8144159564878979
FBgn0041604	CG32146	dally-like	dlp	81.0	0.9943	45.0	-0.0519	27.0	-1.3255	33.0	0.3682	21.0	-0.2385	207.0	0.1388
FBgn0043364	CG4427	cabut	cbt	0.0	-1.7265	51.0	0.1428	49.0	-0.2612	24.0	-0.1841	31.0	0.7551	155.0	-1.58	166.0	1.3575	38.0	-0.1064	45.0	0.5889	12.0	-1.5485	20.0	0.4076	281.0	1.6847	20.0	21.0	20.0	23.0	19.0	20.0	23.0	20.0	23.0	20.0	24.0	20.0	21.0	22.0	22.0	19.0	20.0	20.0	20.0	19.0	20.8	1.5078740698501036
FBgn0043900	CG11518	pygopus	pygo	121.0	2.4772	54.0	-0.1503	37.0	0.9649	14.0	-0.0445	22.0	0.1285	248.0	2.2888	176.0	2.051	75.0	0.4294	54.0	1.8902	38.0	1.3404	51.0	1.5444	394.0	3.6952	18.0	18.0	18.0	18.0	21.0	20.0	21.0	22.0	22.0	18.0	19.0	19.0	20.0	18.0	19.0	19.0	19.0	17.0	18.0	20.0	19.2	1.4363696929192156
FBgn0043903	CG14226	domeless	dome	16.0	-1.1891	98.0	1.6678	48.0	-0.3096	23.0	-0.2455	25.0	0.159	210.0	0.238
FBgn0044028	CG13076	Notum	Notum	177.0	4.2189	87.0	1.3109	36.0	-0.8901	26.0	-0.0614	30.0	0.6558	356.0	5.0641	113.0	0.0908	66.0	0.8245	28.0	-0.305	24.0	-0.4424	26.0	1.2809	257.0	0.8888	20.0	20.0	20.0	18.0	22.0	21.0	20.0	17.0	18.0	17.0	20.0	20.0	19.0	17.0	20.0	21.0	22.0	22.0	18.0	19.0	19.55	1.6375527311718607
FBgn0044046	CG13317	Insulin-like peptide 7	Ilp7	86.0	1.1622	43.0	-0.1168	38.0	-0.7934	27.0	0.0	32.0	0.8545	226.0	0.7669
FBgn0044047	CG14049	Insulin-like peptide 6	Ilp6	72.0	0.692	67.0	0.6619	25.0	-1.4223	33.0	0.3682	4.0	-1.9275	201.0	-0.0595
FBgn0044048	CG33273	Insulin-like peptide 5	Ilp5	31.0	-0.6852	85.0	1.246	44.0	-0.5031	20.0	-0.4296	21.0	-0.2385	201.0	-0.0595
FBgn0044049	CG6736	Insulin-like peptide 4	Ilp4	148.0	6.1593	45.0	-0.075	17.0	-0.8086	17.0	0.2323	21.0	-1.0562	248.0	1.134	139.0	2.0364	62.0	0.1626	35.0	-0.3028	25.0	0.0755	30.0	0.0701	291.0	1.1259	18.0	21.0	18.0	19.0	22.0	22.0	20.0	23.0	19.0	23.0	22.0	22.0	20.0	21.0	18.0	22.0	22.0	18.0	20.0	18.0	20.4	1.8180382718454353
FBgn0044050	CG14167	Insulin-like peptide 3	Ilp3	168.0	3.9166	69.0	0.7268	44.0	-0.5031	41.0	0.8592	25.0	0.159	347.0	4.7666
FBgn0044051	CG14173	Insulin-like peptide 1	Ilp1	133.0	-0.5584	30.0	-1.4702	13.0	-1.1682	13.0	-0.6606	11.0	0.2754	200.0	-1.9962	100.0	1.3785	74.0	2.2993	36.0	0.5012	43.0	2.8601	26.0	0.5861	279.0	2.244	25.0	24.0	21.0	23.0	20.0	24.0	18.0	22.0	23.0	19.0	19.0	23.0	23.0	20.0	22.0	21.0	20.0	21.0	20.0	20.0	21.4	1.9303667499917438
FBgn0044323	CG7392	Connector of kinase to AP-1	Cka	0.0	-1.8048	3.0	-2.7051	3.0	-1.3785	14.0	-0.0445	2.0	-2.0133	22.0	-4.0194	0.0	-1.5952	27.0	-2.319	26.0	-1.9589	10.0	-0.513	13.0	-2.1235	76.0	-3.8133	16.0	12.0	8.0	14.0	15.0	13.0	15.0	16.0	14.0	11.0	17.0	14.0	13.0	15.0	7.0	13.0	12.0	11.0	15.0	12.0	13.15	2.5603248149199227
FBgn0044817	CG32616	Stellate 12D orphon	Ste12DOR	49.0	-0.0806	74.0	0.8891	31.0	-1.132	31.0	0.2455	44.0	2.0467	229.0	0.8661
FBgn0045035	CG6535	telomere fusion	tefu	0.0	-4.3294	19.0	-2.38	28.0	-1.0224	18.0	-0.5044	15.0	-0.2465	80.0	-4.3905	6.0	-5.2443	3.0	-2.8357	0.0	-3.6144	0.0	-1.8116	0.0	-2.0329	9.0	-6.9737	12.0	13.0	13.0	20.0	15.0	15.0	16.0	16.0	15.0	17.0	17.0	17.0	14.0	17.0	16.0	17.0	15.0	18.0	17.0	17.0	15.85	1.899445902583726
FBgn0046332	CG31003	gasket	gskt	87.0	1.274	20.0	-1.8535	61.0	2.6191	29.0	3.293	17.0	-0.4069	214.0	1.3398	70.0	0.0336	67.0	1.6681	21.0	-0.7517	23.0	0.3731	28.0	0.9209	209.0	0.4741	20.0	21.0	21.0	20.0	20.0	21.0	19.0	18.0	19.0	19.0	21.0	20.0	22.0	20.0	21.0	21.0	20.0	19.0	20.0	21.0	20.15	0.9880869341680842
FBgn0046689	CG31421	Tak1-like 1	Takl1	14.0	-1.2563	112.0	2.1221	56.0	0.0774	29.0	0.1227	26.0	0.2583	237.0	1.1305	154.0	1.0707	65.0	0.7913	38.0	0.2208	22.0	-0.6268	27.0	1.4264	306.0	2.5139	20.0	23.0	22.0	20.0	19.0	20.0	18.0	20.0	18.0	18.0	21.0	18.0	21.0	19.0	19.0	19.0	23.0	20.0	20.0	20.0	19.9	1.5183093090324973
FBgn0046692	CG40293	Ste20-like kinase	Stlk	222.0	5.7304	41.0	-0.1817	57.0	0.1258	59.0	1.9639	26.0	0.2583	405.0	6.6838	175.0	1.5726	68.0	0.891	36.0	0.1157	18.0	-0.9955	22.0	0.6987	319.0	2.945	19.0	24.0	25.0	19.0	22.0	19.0	22.0	23.0	28.0	21.0	20.0	23.0	23.0	20.0	20.0	25.0	22.0	22.0	23.0	22.0	22.1	2.314712668311578
FBgn0050476	CG30476	aveugle	ave	108.0	2.0171	71.0	0.7013	26.0	0.2068	38.0	5.2954	23.0	0.2356	266.0	2.7913	125.0	0.9944	84.0	0.9448	28.0	-1.684	29.0	0.7446	34.0	-0.0965	300.0	1.4757	20.0	20.0	21.0	23.0	19.0	21.0	20.0	19.0	21.0	23.0	19.0	20.0	22.0	21.0	20.0	19.0	21.0	19.0	22.0	20.0	20.5	1.2773327473170102
FBgn0051431	CG31431	-	CG31431	114.0	3.2341	4.0	-8.4198	89.0	6.6757	4.0	-3.9901	14.0	-0.1492	225.0	1.4773	67.0	-0.2072	114.0	2.6626	44.0	0.5155	27.0	0.6123	29.0	-0.5791	281.0	1.0271	22.0	24.0	22.0	24.0	20.0	21.0	20.0	19.0	24.0	20.0	21.0	22.0	24.0	24.0	18.0	20.0	24.0	22.0	24.0	24.0	21.95	1.9861361590045286
FBgn0052179	CG32179	Keren	Krn	44.0	-0.2477	36.0	-1.052	21.0	-0.1378	3.0	-2.492	43.0	2.3774	147.0	-0.5303
FBgn0052672	CG32672	Autophagy-related 8a	Atg8a	32.0	-0.6516	20.0	-0.8631	15.0	-1.906	15.0	-0.7365	5.0	-1.8282	87.0	-3.8278	156.0	1.1185	53.0	0.3923	31.0	-0.1472	32.0	0.295	8.0	-1.3391	280.0	1.6516	21.0	19.0	18.0	22.0	18.0	22.0	21.0	20.0	20.0	19.0	20.0	18.0	21.0	21.0	18.0	20.0	20.0	16.0	22.0	20.0	19.8	1.6091841672756186
FBgn0053100	CG33100	eukaryotic translation initiation factor 4E homologous protein	eIF4EHP	109.0	2.6986	55.0	2.7627	24.0	-0.3457	32.0	1.9526	48.0	4.0778	268.0	3.3679	49.0	-0.5801	66.0	-0.0859	58.0	2.4401	25.0	0.4799	38.0	0.2896	236.0	-0.0354	18.0	19.0	19.0	19.0	18.0	20.0	17.0	18.0	18.0	19.0	18.0	20.0	18.0	19.0	20.0	19.0	18.0	18.0	19.0	18.0	18.6	0.8207826816681233
FBgn0053193	CG33193	salvador	sav	101.0	1.6661	12.0	-1.1227	46.0	-0.4064	27.0	0.0	35.0	1.1525	221.0	0.6016
FBgn0053198	CG33198	presenilin enhancer	pen-2	73.0	0.7785	56.0	-0.0501	31.0	0.5514	17.0	0.623	24.0	0.3427	201.0	0.9769
FBgn0053207	CG33207	pxb	pxb	56.0	0.1769	61.0	0.2004	36.0	0.896	24.0	2.1805	1.0	-2.1203	178.0	0.335
FBgn0053236	CG33236	Ste:CG33236	Ste:CG33236	49.0	-0.0806	74.0	0.8891	31.0	-1.132	31.0	0.2455	44.0	2.0467	229.0	0.8661
FBgn0053237	CG33237	Ste:CG33237	Ste:CG33237	49.0	-0.0806	74.0	0.8891	31.0	-1.132	31.0	0.2455	44.0	2.0467	229.0	0.8661
FBgn0053238	CG33238	Ste:CG33238	Ste:CG33238	49.0	-0.0806	74.0	0.8891	31.0	-1.132	31.0	0.2455	44.0	2.0467	229.0	0.8661
FBgn0053239	CG33239	Ste:CG33239	Ste:CG33239	49.0	-0.0806	74.0	0.8891	31.0	-1.132	31.0	0.2455	44.0	2.0467	229.0	0.8661
FBgn0053240	CG33240	Ste:CG33240	Ste:CG33240	49.0	-0.0806	74.0	0.8891	31.0	-1.132	31.0	0.2455	44.0	2.0467	229.0	0.8661
FBgn0053241	CG33241	Ste:CG33241	Ste:CG33241	49.0	-0.0806	74.0	0.8891	31.0	-1.132	31.0	0.2455	44.0	2.0467	229.0	0.8661
FBgn0053242	CG33242	Ste:CG33242	Ste:CG33242	49.0	-0.0806	74.0	0.8891	31.0	-1.132	31.0	0.2455	44.0	2.0467	229.0	0.8661
FBgn0053243	CG33243	Ste:CG33243	Ste:CG33243	49.0	-0.0806	74.0	0.8891	31.0	-1.132	31.0	0.2455	44.0	2.0467	229.0	0.8661
FBgn0053244	CG33244	Ste:CG33244	Ste:CG33244	49.0	-0.0806	74.0	0.8891	31.0	-1.132	31.0	0.2455	44.0	2.0467	229.0	0.8661
FBgn0053245	CG33245	Ste:CG33245	Ste:CG33245	49.0	-0.0806	74.0	0.8891	31.0	-1.132	31.0	0.2455	44.0	2.0467	229.0	0.8661
FBgn0053246	CG33246	Ste:CG33246	Ste:CG33246	49.0	-0.0806	74.0	0.8891	31.0	-1.132	31.0	0.2455	44.0	2.0467	229.0	0.8661
FBgn0053247	CG33247	Ste:CG33247	Ste:CG33247	49.0	-0.0806	74.0	0.8891	31.0	-1.132	31.0	0.2455	44.0	2.0467	229.0	0.8661
FBgn0053542	CG33542	unpaired 3	upd3	101.0	1.6661	92.0	1.4731	52.0	-0.1161	45.0	1.1047	34.0	1.0532	324.0	4.0063	207.0	2.3374	49.0	0.2593	44.0	0.5363	20.0	-0.8111	26.0	1.2809	346.0	3.8404	22.0	22.0	23.0	24.0	24.0	23.0	20.0	22.0	22.0	24.0	22.0	21.0	18.0	20.0	24.0	23.0	25.0	22.0	19.0	20.0	22.0	1.8637822325921862
FBgn0067864	CG12021	Patj	Patj	52.0	0.0202	23.0	-0.7658	4.0	-2.4382	19.0	-0.491	13.0	-1.0333	111.0	-3.0345	140.0	0.7361	38.0	-0.1064	23.0	-0.5679	19.0	-0.9033	28.0	1.572	248.0	0.5903	24.0	21.0	24.0	19.0	19.0	21.0	20.0	23.0	22.0	20.0	19.0	21.0	20.0	20.0	19.0	21.0	19.0	21.0	23.0	21.0	20.85	1.6311119875071336
FBgn0085407	CG34378	PDGF- and VEGF-related factor 3	Pvf3	43.0	-0.2831	48.0	-0.4508	39.0	1.1028	17.0	0.623	8.0	-1.3707	155.0	-0.307
FBgn0085432	CG34403	pangolin	pan	115.0	2.1363	109.0	2.0247	33.0	-1.0353	31.0	0.2455	45.0	2.1461	333.0	4.3038	168.0	1.4053	42.0	0.0266	4.0	-1.5669	30.0	0.1106	3.0	-2.0669	247.0	0.5572	22.0	23.0	23.0	23.0	23.0	21.0	20.0	21.0	22.0	21.0	23.0	20.0	20.0	22.0	21.0	22.0	23.0	21.0	22.0	22.0	21.75	1.0699237552766379
FBgn0086384	CG14228	Merlin	Mer	113.0	2.0691	56.0	0.305	41.0	-0.6482	34.0	0.4296	22.0	-0.1391	266.0	2.0891	104.0	0.5594	44.0	-1.3456	33.0	-0.9966	30.0	0.8108	22.0	-1.2548	233.0	-0.1063	23.0	21.0	23.0	23.0	22.0	22.0	26.0	25.0	18.0	24.0	18.0	22.0	20.0	18.0	20.0	24.0	24.0	15.0	21.0	21.0	21.5	2.7434131641941377
FBgn0086785	CG10711	Vacuolar protein sorting 36	Vps36	0.0	-1.7265	0.0	-1.5121	0.0	-2.6317	0.0	-1.657	0.0	-2.3249	0.0	-6.7036	0.0	-2.6099	0.0	-1.3698	0.0	-1.7772	0.0	-2.6546	0.0	-2.5036	0.0	-7.6344	5.0	4.0	3.0	4.0	2.0	1.0	1.0	1.0	1.0	1.0	1.0	1.0	2.0	1.0	3.0	2.0	1.0	1.0	1.0	1.0	1.85	1.268027892769755
FBgn0087002	CG11064	apolipophorin	apolpp	87.0	1.1958	87.0	1.3109	62.0	0.3677	31.0	0.2455	11.0	-1.232	278.0	2.4858	140.0	0.7361	46.0	0.1596	12.0	-1.1463	8.0	-1.9172	4.0	-1.9213	210.0	-0.6699	21.0	21.0	18.0	19.0	20.0	18.0	18.0	19.0	20.0	21.0	21.0	19.0	19.0	19.0	21.0	20.0	25.0	22.0	20.0	19.0	20.0	1.654340383737022
FBgn0243512	CG7850	puckered	puc	150.0	7.0892	57.0	3.2013	31.0	0.4105	30.0	1.5281	3.0	-1.5167	271.0	3.4998	155.0	1.6159	59.0	-0.4867	24.0	-2.2339	34.0	1.0756	23.0	-1.1583	295.0	1.3577	22.0	23.0	21.0	22.0	19.0	24.0	25.0	19.0	24.0	19.0	17.0	17.0	18.0	24.0	22.0	24.0	21.0	23.0	19.0	23.0	21.3	2.53605578553951
FBgn0250823	CG6963	gilgamesh	gish	25.0	-0.8868	31.0	-0.5062	19.0	-1.7125	16.0	-0.6751	15.0	-0.8346	106.0	-3.1998	84.0	-0.6023	3.0	-1.27	63.0	1.5354	11.0	-1.6407	33.0	2.2998	194.0	-1.2005	22.0	23.0	22.0	23.0	22.0	27.0	24.0	21.0	20.0	21.0	22.0	24.0	26.0	21.0	22.0	19.0	23.0	21.0	24.0	22.0	22.45	1.9049796241485248
FBgn0259176	CG42281	bunched	bun	82.0	1.0279	82.0	1.1486	36.0	-0.8901	33.0	0.3682	38.0	1.4506	271.0	2.2544	66.0	-0.1768	48.0	-0.5106	17.0	-1.2789	27.0	0.562	25.0	2.3283	183.0	-0.0349	16.5	14.5	13.5	14.0	17.5	17.0	16.0	15.0	15.0	16.0	17.5	18.0	15.5	16.0	14.5	16.5	15.0	16.0	14.0	15.0	15.65	2.304399359975699
FBgn0259212	CG42312	canoe	cno	78.0	-0.6211	55.0	2.7627	33.0	0.6265	37.0	3.0138	27.0	1.467	230.0	1.6971	69.0	-0.1657	53.0	-0.8303	59.0	2.5775	32.0	0.9432	27.0	-0.7722	240.0	0.059	19.0	19.0	22.0	18.0	22.0	19.0	20.0	20.0	22.0	18.0	21.0	20.0	22.0	20.0	22.0	19.0	20.0	21.0	19.0	22.0	20.25	1.4095538674570607
FBgn0259685	CG6383	crumbs	crb	101.0	1.8419	70.0	6.0517	50.0	2.4629	31.0	1.7404	34.0	2.3373	286.0	4.1593	152.0	1.5538	48.0	-1.1166	44.0	0.5155	45.0	1.8037	7.0	-2.7027	296.0	1.3813	18.0	15.0	20.0	21.0	20.0	19.0	20.0	20.0	19.0	18.0	20.0	20.0	19.0	19.0	19.0	18.0	20.0	18.0	18.0	20.0	19.05	1.3168942730211062
FBgn0259794	CG13030	sina homologue	sinah	108.0	2.0171	66.0	0.4508	4.0	-1.3096	43.0	6.4079	23.0	0.2356	244.0	2.1772
FBgn0259817	CG42398	SteXh:CG42398	SteXh:CG42398	49.0	-0.0806	74.0	0.8891	31.0	-1.132	31.0	0.2455	44.0	2.0467	229.0	0.8661
FBgn0259984	CG7147	kuzbanian	kuz	192.0	4.9898	72.0	0.7514	53.0	2.0677	36.0	4.8504	3.0	-1.9062	356.0	5.3034	51.0	-1.0054	43.0	-1.0016	34.0	1.5084	29.0	0.7627	10.0	-1.3871	167.0	-0.5009	19.0	21.0	21.0	20.0	22.0	21.0	17.0	18.0	19.0	22.0	22.0	21.0	20.0	21.0	19.0	17.0	19.0	20.0	21.0	20.0	20.0	1.521771820505364
FBgn0260439	CG17291	Protein phosphatase 2A at 29B	Pp2A-29B	109.0	2.0525	61.0	0.2004	52.0	1.9988	30.0	3.5155	36.0	1.6277	288.0	3.4054	71.0	0.0994	45.0	-0.8052	43.0	2.984	42.0	2.0672	39.0	5.7959	240.0	1.625	21.0	21.5	21.0	19.5	20.5	18.5	18.0	20.0	20.5	20.5	18.0	21.0	18.5	20.5	21.5	19.5	19.0	19.0	21.0	21.0	20.0	1.5851878478024344
FBgn0260632	CG6667	dorsal	dl	43.0	-2.2282	91.0	2.7201	25.0	-1.2028	8.0	-1.3451	24.0	0.1496	191.0	-1.1588	166.0	1.3575	72.0	1.024	23.0	-0.5679	45.0	1.4932	34.0	2.4453	340.0	3.6414	19.0	23.0	20.0	19.0	19.0	19.0	19.0	22.0	20.0	24.0	19.0	21.0	18.0	18.0	21.0	20.0	19.0	23.0	21.0	19.0	20.15	1.7252002172135514
FBgn0260941	CG42318	approximated	app	68.0	0.6016	68.0	0.551	38.0	1.0339	21.0	1.513	23.0	0.2356	218.0	1.4515	43.0	-1.1768	83.0	3.1108	32.0	0.1671	31.0	1.3679	38.0	2.5954	227.0	0.9292	18.0	18.0	18.0	19.0	16.0	17.0	19.0	18.0	16.0	16.0	18.0	14.0	20.0	18.0	19.0	20.0	20.0	22.0	17.0	18.0	18.05	1.79105966869954
FBgn0260945	CG10967	Autophagy-related 1	Atg1	126.0	2.5058	101.0	1.7652	81.0	1.2868	38.0	0.6751	12.0	-1.1327	358.0	5.1302	164.0	1.3097	98.0	1.8884	38.0	0.2208	24.0	-0.4424	42.0	3.6098	366.0	4.5037	17.0	18.0	20.0	21.0	17.0	19.0	20.0	20.0	18.0	19.0	17.0	19.0	17.0	18.0	19.0	17.0	17.0	17.0	17.0	21.0	18.4	1.4290224851827544
FBgn0260972	CG8057	alicorn	alc	75.0	0.8493	73.0	0.8015	11.0	-0.8271	24.0	2.1805	17.0	-0.4069	200.0	0.949
FBgn0261260	CG42611	Megalin	mgl	50.0	3.0591	65.0	-2.1927	40.0	1.8564	35.0	-1.5965	31.0	-0.3686	221.0	-0.169
FBgn0261434	CG9768	huckebein	hkb	102.0	1.6997	77.0	0.9864	24.0	-1.4706	23.0	-0.2455	26.0	0.2583	252.0	1.6263	122.0	0.3059	19.0	-0.7381	45.0	0.5889	23.0	-0.5346	5.0	-1.7758	214.0	-0.5373	20.0	20.0	25.0	20.0	17.0	19.0	20.0	21.0	22.0	22.0	19.0	20.0	21.0	18.0	22.0	21.0	20.0	18.0	20.0	20.0	20.25	1.7434086394791455
FBgn0261445	CG10072	sugarless	sgl	53.0	0.0708	68.0	0.551	3.0	-1.3785	18.0	0.8455	11.0	-1.0495	153.0	-0.3629
FBgn0261456	CG11228	hippo	hpo	118.0	3.6624	19.0	-5.1308	51.0	2.5709	35.0	2.5893	21.0	0.7211	244.0	2.3127	184.0	2.2167	50.0	-1.002	37.0	-0.4468	29.0	0.7446	31.0	-0.3861	331.0	2.2077	18.0	19.0	19.0	24.0	24.0	26.0	22.0	23.0	24.0	27.0	22.0	20.0	23.0	30.0	27.0	21.0	21.0	24.0	20.0	28.0	23.1	3.2751054623437215
FBgn0261524	CG12244	licorne	lic	144.0	3.2911	76.0	0.9518	49.0	1.792	26.0	2.6255	22.0	0.1285	317.0	4.2148	137.0	1.243	50.0	-1.002	34.0	-0.8592	41.0	1.5389	19.0	-1.5444	281.0	1.0271	19.0	21.0	21.0	22.0	22.0	21.0	14.0	21.0	18.0	20.0	20.0	21.0	27.0	23.0	23.0	19.0	21.0	22.0	24.0	21.0	21.0	2.5546654946340213
FBgn0261526	CG42576	Neurotrophin 1	NT1	38.0	-0.4501	32.0	-0.4737	2.0	-2.5349	0.0	-1.657	2.0	-2.1262	74.0	-4.2575	73.0	-0.8652	22.0	-0.6383	14.0	-1.0411	12.0	-1.5485	1.0	-2.358	122.0	-3.5884	18.0	21.0	16.0	17.0	17.0	17.0	17.0	16.0	19.0	18.0	16.0	18.0	18.0	18.0	16.0	16.0	17.0	16.0	18.0	19.0	17.4	1.313893370663573
FBgn0261592	CG10944	Ribosomal protein S6	RpS6	0.0	-8.974	0.0	-9.2968	0.0	-2.9382	0.0	-4.839	0.0	-1.8897	0.0	-8.4153	0.0	-1.5952	0.0	-3.865	0.0	-5.5331	0.0	-1.1749	0.0	-3.3783	0.0	-5.6078	14.0	9.0	15.0	14.0	14.0	23.0	4.0	4.0	14.0	10.0	5.0	11.0	12.0	11.0	14.0	13.0	12.0	17.0	5.0	8.0	11.45	4.740364187652563
FBgn0261602	CG1263	Ribosomal protein L8	RpL8	86.0	-0.127	61.0	0.595	29.0	-0.9622	25.0	0.0841	30.0	0.4137	231.0	0.0058
FBgn0261617	CG15319	nejire	nej	0.0	-8.974	0.0	-9.2968	0.0	-2.9382	0.0	-4.839	0.0	-1.8897	0.0	-8.4153	0.0	-1.5952	0.0	-3.865	0.0	-5.5331	0.0	-1.1749	0.0	-3.3783	0.0	-5.6078	0.0	0.0	0.0	0.0	0.0	0.0	0.0	0.0	0.0	0.0	0.0	0.0	0.0	0.0	0.0	0.0	0.0	0.0	0.0	0.0	0.0	0.0
FBgn0261854	CG42783	atypical protein kinase C	aPKC	0.0	-4.7429	2.0	-3.4074	0.0	-2.5488	0.0	-2.8075	0.0	-1.7442	2.0	-9.5249	0.0	-3.1045	0.0	-4.3731	0.0	-2.5058	1.0	-2.3627	0.0	-3.7675	1.0	-4.785	18.0	24.0	21.0	17.0	22.0	27.0	21.0	23.0	24.0	25.0	24.0	20.0	23.0	20.0	20.0	21.0	23.0	21.0	20.0	26.0	22.0	2.5751852258368566
FBgn0261873	CG32717	stardust	sdt	106.0	2.3774	15.0	-6.0078	56.0	3.111	37.0	3.0138	26.0	1.3427	240.0	2.1368	153.0	1.5745	36.0	-1.8037	23.0	-2.3713	48.0	2.0023	12.0	-2.22	272.0	0.8146	18.0	20.0	19.0	22.0	20.0	18.0	19.0	18.0	21.0	21.0	18.0	16.0	22.0	20.0	18.0	19.0	19.0	17.0	16.0	21.0	19.1	1.7740824166460336
FBgn0261885	CG7467	osa	osa	1.0	-4.2806	20.0	-2.3092	10.0	-2.1048	3.0	-1.7654	17.0	-0.1584	51.0	-5.2348	63.0	-2.124	65.0	0.3151	26.0	-1.1543	11.0	-0.9813	10.0	-1.3319	175.0	-2.2058	16.0	18.0	19.0	19.0	13.0	14.0	14.0	15.0	14.0	15.0	16.0	15.0	15.0	15.0	14.0	15.0	15.0	16.0	13.0	14.0	15.25	1.7129537431920894
FBgn0261988	CG17998	G protein-coupled receptor kinase 2	Gprk2	0.0	-8.974	1.0	-9.0776	1.0	-2.8302	0.0	-4.839	2.0	-1.641	4.0	-8.2395	6.0	-1.4709	0.0	-3.865	0.0	-5.5331	0.0	-1.1749	2.0	-3.1853	8.0	-5.4189	20.0	18.0	19.0	17.0	20.0	19.0	16.0	20.0	22.0	24.0	20.0	19.0	19.0	18.0	21.0	19.0	20.0	21.0	18.0	22.0	19.6	1.8467610337532774
FBgn0262029	CG42840	dachs	d	0.0	-1.7265	60.0	0.4348	9.0	-2.1963	20.0	-0.4296	13.0	-1.0333	102.0	-3.332	105.0	-0.1004	69.0	0.9243	15.0	-0.9885	20.0	-0.8111	3.0	-2.0669	212.0	-0.6036	20.0	23.0	22.0	25.0	21.0	26.0	24.0	20.0	21.0	20.0	22.0	21.0	17.0	19.0	22.0	21.0	20.0	21.0	22.0	21.0	21.4	2.0365088806711915
FBgn0262114	CG42236	Ran-binding protein M	RanBPM	72.0	0.7432	38.0	-0.9518	3.0	-1.3785	24.0	2.1805	20.0	-0.0857	157.0	-0.2512
FBgn0262127	CG33967	kibra	kibra	78.0	-0.6211	22.0	-4.473	52.0	2.6789	26.0	0.6792	20.0	0.5967	198.0	0.2902
FBgn0262473	CG5490	Toll	Tl	60.0	-1.286	63.0	0.4074	29.0	-0.2022	11.0	-0.3037	35.0	0.0812	198.0	-0.1665
FBgn0262582	CG43122	capicua	cic	71.0	-1.3707	2.0	-8.8583	86.0	6.3517	3.0	-4.2023	31.0	1.9643	193.0	0.0703
FBgn0262614	CG43140	polychaetoid	pyd	154.0	3.645	49.0	-0.4008	49.0	1.792	19.0	1.068	35.0	1.5207	306.0	3.9078	22.0	-1.1394	125.0	3.2924	53.0	1.7527	33.0	1.0094	31.0	-0.3861	264.0	0.6257	23.0	23.0	26.0	22.0	24.0	23.0	24.0	24.0	24.0	25.0	22.0	28.0	22.0	24.0	23.0	23.0	23.0	27.0	24.0	26.0	24.0	1.654340383737022
FBgn0262656	CG10798	Myc	Myc	134.0	2.7745	57.0	0.3375	47.0	-0.358	34.0	0.4296	24.0	0.0596	296.0	3.0808	65.0	-1.0564	49.0	0.2593	28.0	-0.305	25.0	-0.3503	18.0	0.1164	185.0	-1.499	17.0	20.0	19.0	21.0	16.0	21.0	18.0	20.0	19.0	16.0	17.0	19.0	18.0	20.0	18.0	19.0	18.0	17.0	19.0	18.0	18.5	1.4689774459950378
FBgn0262733	CG7524	Src oncogene at 64B	Src64B	5.0	-4.0851	84.0	2.2242	57.0	0.7217	4.0	-1.6813	33.0	0.5457	183.0	-1.3917	122.0	1.1058	62.0	0.1626	40.0	0.1703	12.0	-0.9058	38.0	0.6309	274.0	0.6376	20.0	21.0	20.0	19.0	18.0	19.0	19.0	21.0	20.0	20.0	20.0	20.0	19.0	19.0	18.0	21.0	22.0	21.0	20.0	19.0	19.8	1.056309364572809
FBgn0262738	CG3620	no receptor potential A	norpA	92.0	0.1661	50.0	-0.1842	30.0	-0.9021	15.0	-0.7566	17.0	-0.1584	204.0	-0.7803
FBgn0262866	CG17596	Ribosomal protein S6 kinase II	S6kII	145.0	3.144	105.0	1.8949	55.0	0.029	38.0	0.6751	40.0	1.6493	383.0	5.9566	144.0	0.8317	45.0	0.1263	17.0	-0.8834	12.0	-1.5485	10.0	-1.048	228.0	-0.073	22.0	19.0	20.0	22.0	22.0	19.0	23.0	18.0	22.0	24.0	24.0	21.0	22.0	21.0	21.0	21.0	19.0	22.0	21.0	22.0	21.25	1.6181535936466531
FBgn0263289	CG43398	scribbled	scrib	0.0	-4.7429	0.0	-3.5457	0.0	-2.5488	0.0	-2.8075	0.0	-1.7442	0.0	-9.6009	0.0	-3.1045	0.0	-4.3731	0.0	-2.5058	0.0	-2.4871	0.0	-3.7675	0.0	-4.8103	19.0	18.0	19.0	18.0	15.0	18.0	17.0	19.0	18.0	19.0	17.0	17.0	19.0	17.0	19.0	18.0	18.0	20.0	16.0	16.0	17.85	1.2680278927697555
FBgn0263395	CG7097	happyhour	hppy	18.0	-3.4499	71.0	1.3034	48.0	0.1804	15.0	-0.7566	15.0	-0.2465	167.0	-1.8575	152.0	1.0229	37.0	-0.1396	41.0	0.3786	19.0	-0.9033	37.0	2.882	286.0	1.8506	22.0	20.0	18.0	20.0	20.0	17.0	23.0	20.0	19.0	19.0	18.0	18.0	20.0	21.0	18.0	19.0	22.0	21.0	21.0	20.0	19.8	1.5761378513048243
FBgn0263601	CG5841	mind bomb 1	mib1	114.0	1.2412	63.0	0.7367	39.0	-0.3608	2.0	-1.8495	28.0	0.3257	246.0	0.4425
FBgn0263930	CG4974	division abnormally delayed	dally	65.0	-1.1532	64.0	0.8075	46.0	0.0601	5.0	-1.5973	33.0	0.5457	213.0	-0.5182
FBgn0263933	CG4063	ebi	ebi	72.0	-0.8112	64.0	0.8075	46.0	0.0601	24.0	0.0	24.0	0.1496	230.0	-0.0233
FBgn0264270	CG43770	Sex lethal	Sxl	0.0	-1.7265	0.0	-1.5121	0.0	-2.6317	0.0	-1.657	0.0	-2.3249	0.0	-6.7036	0.0	-2.6099	0.0	-1.3698	0.0	-1.7772	0.0	-2.6546	0.0	-2.5036	0.0	-7.6344	0.0	0.0	0.0	0.0	0.0	0.0	0.0	0.0	0.0	0.0	0.0	0.0	0.0	0.0	0.0	0.0	0.0	0.0	0.0	0.0	0.0	0.0
FBgn0264272	CG43772	multiple wing hairs	mwh	162.0	0.3539	30.0	-1.4702	19.0	-0.531	3.0	-2.312	18.0	1.5606	232.0	-0.7795
FBgn0264492	CG17520	casein kinase IIalpha	CkIIalpha	0.0	-1.8048	0.0	-2.8554	0.0	-1.5853	0.0	-3.1595	0.0	-2.2274	0.0	-4.6335	0.0	-1.5952	0.0	-3.865	1.0	-5.3956	0.0	-1.1749	0.0	-3.3783	1.0	-5.5842	14.0	12.0	10.0	8.0	12.0	8.0	16.0	14.0	13.0	12.0	14.0	12.0	11.0	14.0	10.0	8.0	17.0	13.0	12.0	9.0	11.95	2.564432839727662
FBgn0264607	CG18069	Calcium/calmodulin-dependent protein kinase II	CaMKII	115.0	3.3412	67.0	5.3939	29.0	0.1944	12.0	-2.2922	22.0	0.8454	245.0	2.3566	146.0	1.4295	74.0	0.3722	51.0	1.4778	41.0	1.5389	34.0	-0.0965	346.0	2.5619	24.0	22.0	21.0	19.0	21.0	22.0	21.0	22.0	22.0	24.0	21.0	22.0	22.0	22.0	24.0	23.0	22.0	21.0	22.0	23.0	22.0	1.2139539573337679
FBgn0264691	CG3004	Lst8	Lst8	70.0	-0.9089	65.0	0.8784	23.0	-1.323	1.0	-1.9335	2.0	-0.8186	161.0	-2.0322	147.0	0.9034	32.0	-0.3059	37.0	0.1683	3.0	-2.3781	15.0	-0.3202	234.0	0.126	22.0	19.0	19.0	22.0	19.0	8.0	20.0	18.0	20.0	18.0	23.0	20.0	19.0	22.0	23.0	21.0	19.0	20.0	21.0	20.0	19.65	3.1334359818945683
FBgn0264959	CG44128	Src oncogene at 42A	Src42A	148.0	6.8751	47.0	1.0086	35.0	0.8426	18.0	-1.0187	22.0	0.8454	270.0	3.4558	176.0	2.051	68.0	0.0286	36.0	-0.5842	60.0	2.7965	28.0	-0.6757	368.0	3.0813	18.0	18.0	19.0	19.0	18.0	20.0	21.0	22.0	19.0	13.0	21.0	20.0	21.0	20.0	20.0	22.0	18.0	21.0	23.0	21.0	19.7	2.154554539378824
FBgn0264975	CG1634	Neuroglian	Nrg	1.0	-1.6929	76.0	0.954	21.0	-1.6158	40.0	0.7978	19.0	-0.4372	157.0	-1.5139	113.0	1.9613	53.0	0.4058	31.0	0.0835	38.0	2.2384	16.0	-1.0884	251.0	1.536	19.0	18.0	19.0	23.0	21.0	20.0	18.0	20.0	19.0	20.0	18.0	21.0	21.0	18.0	20.0	19.0	21.0	20.0	19.0	19.0	19.65	1.3088765773505313
FBgn0265089	CG8023	eukaryotic translation initiation factor 4E3	eIF4E3	165.0	0.4483	53.0	0.1211	21.0	-0.3186	3.0	-2.312	32.0	4.1309	274.0	0.8175
FBgn0265464	CG10961	TNF-receptor-associated factor 6	Traf6	59.0	0.2553	58.0	0.3699	39.0	-0.745	25.0	-0.1227	39.0	1.55	220.0	0.5686
FBgn0265778	CG9491	PDZ domain-containing guanine nucleotide exchange factor	PDZ-GEF	101.0	0.6059	58.0	0.3825	35.0	-0.6014	12.0	-1.0088	22.0	0.0616	228.0	-0.0815
FBgn0265974	CG10117	tout-velu	ttv	3.0	-1.6986	12.0	-2.2542	2.0	-1.4474	3.0	-2.492	2.0	-2.0133	22.0	-4.0194	9.0	-1.4087	13.0	-3.1207	13.0	-3.746	5.0	-0.8439	4.0	-2.9922	44.0	-4.5689	18.0	20.0	21.0	20.0	19.0	19.0	20.0	20.0	21.0	17.0	18.0	17.0	17.0	19.0	21.0	17.0	20.0	19.0	19.0	18.0	19.0	1.3764944032233708
FBgn0265998	CG42320	Darkener of apricot	Doa	66.0	0.4904	2.0	-1.4472	74.0	0.9482	37.0	0.6137	30.0	0.6558	209.0	0.2049
FBgn0266411	CG7951	similar	sima	28.0	-2.9612	40.0	-0.8925	15.0	-1.8042	16.0	-0.6725	6.0	-0.6425	105.0	-3.6626	178.0	1.6443	65.0	0.7913	3.0	-1.6195	35.0	0.5715	21.0	0.5531	302.0	2.3812	22.0	20.0	16.0	18.0	21.0	25.0	21.0	18.0	19.0	23.0	21.0	18.0	19.0	19.0	24.0	22.0	20.0	19.0	21.0	22.0	20.4	2.2337129816094383
FBgn0283472	CG10539	Ribosomal protein S6 kinase	S6k	91.0	0.771	65.0	4.9554	28.0	0.0864	12.0	-2.2922	16.0	0.0995	212.0	0.9057
FBgn0283499	CG18402	Insulin-like receptor	InR	75.0	4.88	42.0	-3.0713	28.0	0.8878	26.0	-2.7938	34.0	0.0263	205.0	-0.5445
FBgn0284084	CG4889	wingless	wg	46.0	-2.0816	89.0	2.5784	39.0	-0.3608	24.0	0.0	24.0	0.1496	222.0	-0.2562
FBgn0284247	CG17941	dachsous	ds	28.0	-5.9755	3.0	-8.639	69.0	4.5153	1.0	-4.6268	3.0	-1.5167	104.0	-3.8427	77.0	0.0	88.0	1.1738	57.0	2.3026	26.0	0.5461	43.0	0.7722	291.0	1.2632	25.0	25.0	21.0	22.0	21.0	21.0	23.0	23.0	21.0	20.0	22.0	22.0	19.0	20.0	22.0	20.0	21.0	20.0	22.0	21.0	21.55	1.5719582155957403
FBgn0284421	CG18803	Presenilin	Psn	91.0	0.771	49.0	1.4471	20.0	-0.7778	14.0	-1.8677	3.0	-1.5167	177.0	-0.6331
FBgn0285896	CG32134	breathless	btl	104.0	2.1632	63.0	4.5168	33.0	0.6265	30.0	1.5281	24.0	1.094	254.0	2.7523	114.0	2.0061	78.0	2.6599	25.0	-0.4176	36.0	1.9897	33.0	1.7582	286.0	2.4209	17.0	17.0	17.0	18.0	23.0	25.0	22.0	22.0	22.0	24.0	21.0	18.0	21.0	19.0	19.0	20.0	22.0	20.0	19.0	19.0	20.25	2.359192546971148
FBgn0285955	CG34389	crossveinless c	cv-c	102.0	1.949	8.0	-7.5427	108.0	8.7281	31.0	1.7404	16.0	0.0995	265.0	3.236	179.0	2.1131	57.0	-0.6012	21.0	-2.6463	35.0	1.1418	43.0	0.7722	335.0	2.3022	20.0	21.0	20.0	19.0	22.0	22.0	23.0	18.0	22.0	24.0	23.0	23.0	23.0	20.0	20.0	20.0	20.0	18.0	19.0	20.0	20.85	1.7851728502481656
FBgn0286070	CG6556	connector enhancer of ksr	cnk	33.0	-3.5704	40.0	-0.209	6.0	-1.3646	8.0	-0.5717	34.0	0.0	121.0	-2.1691	39.0	-3.4378	34.0	-1.2603	40.0	0.1703	23.0	-0.0755	32.0	0.2103	168.0	-2.4069	22.0	19.0	18.0	19.0	22.0	19.0	25.0	22.0	17.0	17.0	17.0	23.0	21.0	22.0	18.0	17.0	22.0	19.0	17.0	19.0	19.75	2.4251966822029964
FBgn0000499	CG18361	dishevelled	dsh	136.0	2.8417	17.0	-0.9605	65.0	0.5128	24.0	-0.1841	25.0	0.159	267.0	2.1222	148.0	0.9273	41.0	-0.0066	20.0	-0.7256	23.0	-0.5346	24.0	0.9898	256.0	0.8556	21.0	23.0	20.0	21.0	21.0	19.0	15.0	18.0	19.0	21.0	18.0	22.0	20.0	19.0	19.0	20.0	18.0	17.0	18.0	14.0	19.15	2.207046132634963
FBgn0000546	CG1765	Ecdysone receptor	EcR	157.0	-0.1407	95.0	0.1744	66.0	0.3708	38.0	-0.345	25.0	-0.4492	381.0	-0.0384	129.0	-0.7046	47.0	-1.4272	38.0	0.5397	32.0	-0.6282	28.0	-1.5627	274.0	-1.0325	24.0	21.0	21.0	21.0	22.0	21.0	26.0	23.0	23.0	21.0	23.0	21.0	22.0	21.0	20.0	23.0	21.0	23.0	20.0	23.0	22.0	1.4867838833500564
FBgn0000635	CG3665	Fasciclin 2	Fas2	158.0	-0.1847	54.0	-0.7844	62.0	0.0859	29.0	-1.2473	24.0	0.1911	327.0	-0.7602	183.0	4.1304	57.0	-0.5295	55.0	-0.2558	38.0	-0.604	5.0	-1.3108	338.0	0.5986	15.0	20.0	24.0	24.0	20.0	15.0	21.0	21.0	19.0	17.0	26.0	21.0	22.0	26.0	19.0	15.0	19.0	21.0	17.0	23.0	20.25	3.369757136337089
FBgn0003041	CG8114	pebble	pbl	0.0	-4.3349	0.0	-5.0747	0.0	-4.7106	0.0	-5.2352	0.0	-4.044	0.0	-12.1563	0.0	-7.322	0.0	-2.8072	0.0	-2.4203	0.0	-3.1544	0.0	-1.6229	0.0	-11.8525	0.0	0.0	0.0	0.0	0.0	0.0	0.0	0.0	0.0	0.0	0.0	0.0	0.0	0.0	0.0	0.0	0.0	0.0	0.0	0.0	0.0	0.0
FBgn0003430	CG16738	sloppy paired 1	slp1	138.0	2.9089	53.0	0.2077	83.0	1.3836	39.0	0.7365	45.0	2.1461	358.0	5.1302	180.0	1.6921	29.0	-0.4056	49.0	0.7992	5.0	-2.1938	25.0	1.1353	288.0	1.9169	20.0	21.0	22.0	21.0	21.0	24.0	22.0	25.0	22.0	18.0	22.0	21.0	21.0	18.0	24.0	22.0	23.0	19.0	20.0	18.0	21.2	1.9894458366193601
FBgn0003444	CG11561	smoothened	smo	14.0	-7.4748	7.0	-7.762	25.0	-0.2376	33.0	2.1648	14.0	-0.1492	93.0	-4.3264	81.0	0.0829	68.0	0.0286	17.0	-3.1961	40.0	1.4727	22.0	-1.2548	228.0	-0.2243	18.0	19.0	16.0	15.0	14.0	15.0	4.0	13.0	18.0	15.0	15.0	21.0	23.0	21.0	18.0	17.0	16.0	17.0	16.0	15.0	16.3	3.8539112053792013
FBgn0003607	CG8409	Suppressor of variegation 205	Su(var)205	57.0	-3.9165	28.0	-2.2207	13.0	-2.5435	6.0	-4.299	0.0	-2.1024	104.0	-7.5412	24.0	-5.8201	14.0	-2.2478	4.0	-2.2629	1.0	-3.0873	1.0	-1.5605	44.0	-10.2316	18.0	19.0	21.0	28.0	20.0	24.0	22.0	23.0	23.0	24.0	24.0	24.0	24.0	23.0	21.0	22.0	26.0	23.0	23.0	25.0	22.85	2.323223713087621
FBgn0004638	CG6033	downstream of receptor kinase	drk	64.0	0.4601	44.0	-0.6512	11.0	-0.8271	3.0	-2.492	1.0	-2.1203	123.0	-1.2002	80.0	0.4819	48.0	-0.0451	5.0	-2.0882	7.0	-1.6166	6.0	-2.7628	146.0	-1.1188	19.0	19.0	20.0	19.0	21.0	20.0	15.0	21.0	17.0	20.0	19.0	21.0	21.0	20.0	20.0	22.0	16.0	18.0	20.0	20.0	19.4	1.7591864148251206
FBgn0005198	CG6975	gigas	gig	70.0	-1.0533	30.0	-1.4547	16.0	-3.5184	14.0	-2.5746	8.0	-2.5056	138.0	-1.9707	124.0	-0.3451	69.0	1.5886	23.0	0.2674	13.0	-3.0221	19.0	0.0757	248.0	-0.2376	19.0	24.0	16.0	22.0	21.0	19.0	20.0	19.0	19.0	24.0	17.0	21.0	16.0	19.0	15.0	22.0	20.0	16.0	22.0	17.0	19.4	2.663594721819605
FBgn0005777	CG8402	Protein phosphatase D3	PpD3	190.0	0.9976	69.0	0.0442	46.0	-0.7727	39.0	0.0796	16.0	-0.5734	360.0	0.2433	196.0	4.9439	91.0	0.8292	67.0	0.2165	35.0	-0.8054	42.0	0.9987	431.0	4.0245	18.0	17.0	20.0	18.0	19.0	22.0	18.0	22.0	18.0	19.0	17.0	25.0	16.0	20.0	21.0	17.0	19.0	19.0	22.0	19.0	19.3	2.2028689427533745
FBgn0011259	CG18405	Semaphorin 1a	Sema1a	202.0	1.441	65.0	-0.1768	61.0	0.0322	28.0	-1.3799	26.0	0.3823	382.0	0.9122	238.0	7.5724	89.0	0.7493	64.0	0.0984	20.0	-1.8121	34.0	0.4994	445.0	4.5402	22.0	21.0	22.0	22.0	27.0	24.0	26.0	26.0	24.0	25.0	27.0	23.0	26.0	24.0	22.0	21.0	25.0	24.0	22.0	21.0	23.7	2.0287408591745306
FBgn0011726	CG4254	twinstar	tsr	0.0	-6.0226	0.0	-3.7674	0.0	-3.241	0.0	-5.0952	0.0	-2.1024	0.0	-10.7036	0.0	-7.322	0.0	-2.8072	0.0	-2.4203	0.0	-3.1544	0.0	-1.6229	0.0	-11.8525	0.0	0.0	0.0	0.0	0.0	0.0	0.0	0.0	0.0	0.0	0.0	0.0	0.0	0.0	0.0	0.0	0.0	0.0	0.0	0.0	0.0	0.0
FBgn0014179	CG12245	glial cells missing	gcm	202.0	1.441	117.0	2.6958	78.0	0.9444	51.0	1.6718	56.0	3.2492	504.0	4.622	197.0	5.0065	99.0	1.1489	52.0	-0.3739	46.0	-0.0671	46.0	1.2484	440.0	4.356	19.0	22.0	20.0	19.0	21.0	24.0	22.0	21.0	20.0	22.0	24.0	19.0	19.0	21.0	22.0	18.0	20.0	20.0	20.0	19.0	20.6	1.6670175069329811
FBgn0015268	CG5330	Nucleosome assembly protein 1	Nap1	138.0	0.2976	53.0	0.362	35.0	0.3722	22.0	-1.2863	18.0	-2.8675	266.0	-0.6673	82.0	2.2011	54.0	0.7646	32.0	1.2527	33.0	0.6047	24.0	-0.4128	225.0	1.0604	25.0	24.0	26.0	24.0	24.0	27.0	22.0	19.0	24.0	23.0	22.0	25.0	19.0	22.0	26.0	23.0	23.0	21.0	21.0	23.0	23.15	2.1588252165910684
FBgn0015282	CG5289	Regulatory particle triple-A ATPase 2	Rpt2	0.0	-7.1683	0.0	-2.8359	0.0	-3.636	0.0	-3.5058	0.0	-5.2965	0.0	-9.8878	0.0	-6.1549	0.0	-2.8572	0.0	-2.8378	0.0	-1.6126	0.0	-2.4769	0.0	-4.016	0.0	0.0	0.0	0.0	0.0	0.0	0.0	0.0	0.0	0.0	0.0	0.0	0.0	0.0	0.0	0.0	0.0	0.0	0.0	0.0	0.0	0.0
FBgn0015838	CG8075	Van Gogh	Vang	86.0	0.9137	96.0	1.2918	33.0	0.0	14.0	-0.0357	31.0	-0.2437	260.0	1.4461	151.0	2.6933	55.0	-0.1931	34.0	-0.3974	32.0	0.6039	25.0	-0.2804	297.0	1.2982	21.0	23.0	20.0	20.0	19.0	22.0	16.0	21.0	23.0	23.0	20.0	24.0	23.0	23.0	20.0	22.0	20.0	21.0	20.0	25.0	21.3	2.054520048960085
FBgn0016917	CG4257	Signal-transducer and activator of transcription protein at 92E	Stat92E	0.0	-6.0226	0.0	-3.7674	0.0	-3.241	0.0	-5.0952	0.0	-2.1024	0.0	-10.7036	0.0	-7.322	0.0	-2.8072	0.0	-2.4203	0.0	-3.1544	0.0	-1.6229	0.0	-11.8525	7.0	13.0	16.0	14.0	14.0	15.0	18.0	17.0	18.0	12.0	14.0	12.0	14.0	13.0	11.0	13.0	16.0	15.0	15.0	15.0	14.1	2.5319017192200564
FBgn0021944	CG3433	Coproporphyrinogen oxidase	Coprox	147.0	-0.5912	87.0	1.0385	44.0	-0.88	42.0	0.4777	22.0	0.0	342.0	-0.3041	114.0	-0.1877	94.0	0.9491	56.0	-0.2165	24.0	-1.5437	33.0	0.4369	321.0	-0.0276	19.0	21.0	23.0	19.0	22.0	19.0	20.0	19.0	18.0	21.0	20.0	21.0	21.0	21.0	21.0	21.0	19.0	22.0	19.0	20.0	20.3	1.30182058752551
FBgn0023172	CG9635	Rho guanine nucleotide exchange factor 2	RhoGEF2	129.0	-1.2562	48.0	-1.1159	50.0	-0.5581	49.0	1.4065	42.0	1.9113	318.0	-1.0339	143.0	1.6271	67.0	-0.1299	35.0	-1.0429	46.0	-0.0671	42.0	0.9987	333.0	0.4144	27.0	31.0	27.0	27.0	27.0	25.0	30.0	27.0	28.0	29.0	25.0	27.0	30.0	28.0	27.0	26.0	28.0	25.0	29.0	34.0	27.85	2.207046132634963
FBgn0023540	CG3630	-	CG3630	0.0	-6.0226	0.0	-3.7674	0.0	-3.241	0.0	-5.0952	0.0	-2.1024	0.0	-10.7036	0.0	-7.322	0.0	-2.8072	0.0	-2.4203	0.0	-3.1544	0.0	-1.6229	0.0	-11.8525	0.0	0.0	0.0	0.0	0.0	0.0	13.0	16.0	0.0	0.0	5.0	0.0	16.0	13.0	6.0	0.0	4.0	0.0	0.0	0.0	3.65	5.896252154859407
FBgn0024846	CG7393	p38b MAP kinase	p38b	181.0	0.6631	89.0	-0.3012	59.0	-0.0767	47.0	0.8492	37.0	1.1361	413.0	0.5195	268.0	3.7071	129.0	4.3097	68.0	2.6701	35.0	-0.3337	46.0	0.3379	546.0	3.9647	22.0	23.0	21.0	24.0	28.0	24.0	22.0	22.0	22.0	25.0	22.0	21.0	19.0	20.0	21.0	26.0	23.0	24.0	20.0	22.0	22.55	2.163695668842645
FBgn0025674	CG15218	Cyclin K	CycK	0.0	-5.3983	0.0	-7.3549	0.0	-3.8484	0.0	-5.3871	0.0	-3.7518	0.0	-6.6801	0.0	-4.7989	0.0	-4.7155	0.0	-2.1588	0.0	-3.7691	0.0	-4.5191	0.0	-6.0664	8.0	12.0	4.0	9.0	13.0	7.0	13.0	8.0	16.0	7.0	13.0	4.0	8.0	7.0	9.0	13.0	11.0	7.0	14.0	10.0	9.65	3.34467369189629
FBgn0027535	CG15110	brother of tout-velu	botv	77.0	0.9201	61.0	0.2004	46.0	1.5853	11.0	-0.712	16.0	-0.514	211.0	1.2561	94.0	0.3522	126.0	3.3497	44.0	0.5155	21.0	0.2151	14.0	-2.027	299.0	1.4521	21.0	22.0	21.0	22.0	17.0	18.0	19.0	21.0	20.0	20.0	18.0	18.0	20.0	21.0	20.0	18.0	21.0	21.0	19.0	20.0	19.85	1.460893742308383
FBgn0028509	CG31811	Centaurin gamma 1A	CenG1A	144.0	-0.702	78.0	0.5414	52.0	-0.4507	25.0	-1.778	5.0	-1.6246	304.0	-1.4596	166.0	3.0665	83.0	0.5095	25.0	-1.4364	51.0	0.2685	14.0	-0.749	339.0	0.6354	26.0	20.0	20.0	21.0	27.0	23.0	20.0	20.0	25.0	25.0	21.0	22.0	19.0	19.0	23.0	22.0	21.0	19.0	22.0	20.0	21.75	2.403396719119356
FBgn0030018	CG2272	slipper	slpr	157.0	-0.2217	74.0	0.3204	42.0	-0.9873	22.0	-2.1761	22.0	0.0	317.0	-1.0643	116.0	-0.0626	101.0	1.2288	65.0	0.1377	30.0	-1.141	25.0	-0.0624	337.0	0.5618	22.0	22.0	22.0	24.0	23.0	22.0	23.0	24.0	24.0	21.0	22.0	19.0	24.0	23.0	22.0	25.0	22.0	19.0	22.0	20.0	22.25	1.6181535936466531
FBgn0031610	CG15436	-	CG15436	187.0	0.8868	82.0	0.7623	70.0	0.5151	36.0	-0.3184	28.0	0.5734	403.0	1.5508	218.0	6.3207	97.0	1.0689	83.0	0.8461	55.0	0.5369	52.0	1.6229	505.0	6.7505	19.0	19.0	20.0	19.0	21.0	20.0	20.0	20.0	18.0	19.0	22.0	20.0	20.0	21.0	19.0	18.0	2.0	19.0	21.0	20.0	18.85	4.094604922783663
FBgn0035213	CG2199	-	CG2199	0.0	-4.7975	0.0	-4.3319	0.0	-6.2258	0.0	-2.0673	0.0	-2.2719	0.0	-5.6305	0.0	-3.7965	0.0	-3.8921	0.0	-2.528	0.0	-5.1118	0.0	-2.3219	0.0	-7.2512	0.0	0.0	0.0	0.0	0.0	0.0	0.0	0.0	0.0	0.0	0.0	0.0	0.0	0.0	0.0	0.0	0.0	0.0	0.0	0.0	0.0	0.0
FBgn0035640	CG17498	mad2	mad2	54.0	-4.0274	39.0	-1.613	36.0	-1.3093	33.0	-0.7165	4.0	-1.7201	166.0	-5.6559	150.0	2.0652	70.0	-0.01	68.0	0.2558	35.0	-0.8054	28.0	0.1248	351.0	1.0775	17.0	15.0	18.0	18.0	19.0	18.0	15.0	16.0	17.0	21.0	17.0	18.0	17.0	21.0	19.0	18.0	18.0	17.0	18.0	21.0	17.9	1.713721711732438
FBgn0036136	CG6233	Ubiquitin fusion-degradation 1-like	Ufd1-like	0.0	-6.0226	0.0	-3.7674	0.0	-3.241	0.0	-5.0952	0.0	-2.1024	0.0	-10.7036	0.0	-7.322	0.0	-2.8072	0.0	-2.4203	0.0	-3.1544	0.0	-1.6229	0.0	-11.8525	0.0	0.0	0.0	0.0	0.0	0.0	0.0	0.0	0.0	0.0	0.0	0.0	0.0	0.0	0.0	0.0	0.0	0.0	0.0	0.0	0.0	0.0
FBgn0036790	CG7285	Allatostatin C receptor 1	AstC-R1	212.0	1.8105	74.0	0.3204	68.0	0.4078	42.0	0.4777	36.0	1.3379	432.0	2.4326	170.0	3.3168	108.0	1.5085	48.0	-0.5313	55.0	0.5369	24.0	-0.1248	405.0	3.0667	20.0	20.0	19.0	19.0	19.0	19.0	22.0	18.0	18.0	21.0	18.0	20.0	20.0	20.0	20.0	21.0	20.0	18.0	23.0	23.0	19.9	1.5183093090324964
FBgn0037874	CG4800	Translationally controlled tumor protein	Tctp	39.0	-5.0584	20.0	-1.6291	11.0	-2.3763	6.0	-2.9005	8.0	-4.2169	84.0	-6.976	0.0	-6.1549	1.0	-2.7901	1.0	-2.7099	0.0	-1.6126	1.0	-2.3909	3.0	-3.9483	17.0	14.0	16.0	18.0	18.0	19.0	18.0	19.0	19.0	13.0	19.0	17.0	19.0	13.0	16.0	20.0	12.0	10.0	16.0	15.0	16.4	2.7796251167151445
FBgn0038167	CG9374	Lkb1 kinase	Lkb1	152.0	6.4978	60.0	0.327	40.0	0.3538	42.0	2.4657	10.0	-1.9499	304.0	2.5905	129.0	1.489	76.0	0.8741	48.0	0.9273	6.0	-1.3587	30.0	0.0701	289.0	1.0685	21.0	22.0	25.0	22.0	21.0	21.0	21.0	21.0	25.0	25.0	21.0	25.0	26.0	23.0	21.0	20.0	22.0	23.0	26.0	24.0	22.75	1.9701723141310308
FBgn0039044	CG33336	p53	p53	33.0	-0.6181	175.0	4.1663	60.0	0.2709	27.0	0.0	49.0	2.5435	344.0	4.6674	146.0	0.8795	18.0	-0.7713	54.0	1.0621	6.0	-2.1016	3.0	-2.0669	227.0	-0.1061	18.0	18.0	18.0	20.0	20.0	20.0	21.0	18.0	18.0	18.0	22.0	21.0	18.0	20.0	22.0	20.0	18.0	19.0	18.0	20.0	19.35	1.4244112357114613
FBgn0039234	CG7012	Nicastrin	Nct	172.0	0.3325	54.0	-0.7844	59.0	-0.0751	44.0	0.743	18.0	-0.3823	347.0	-0.152	180.0	3.9426	76.0	0.2298	39.0	-0.8855	33.0	-0.9396	7.0	-1.186	335.0	0.4881	21.0	19.0	18.0	15.0	17.0	18.0	20.0	23.0	20.0	18.0	19.0	21.0	18.0	18.0	17.0	16.0	16.0	18.0	14.0	14.0	18.0	2.339590607462407
FBgn0040078	CG4003	pontin	pont	202.0	1.441	104.0	1.9776	90.0	1.5883	38.0	-0.0531	64.0	4.0137	498.0	4.4396	194.0	4.8188	69.0	-0.05	58.0	-0.1377	57.0	0.6712	15.0	-0.6866	393.0	2.6247	22.0	19.0	19.0	18.0	20.0	19.0	21.0	19.0	20.0	26.0	20.0	19.0	22.0	22.0	19.0	25.0	19.0	20.0	25.0	19.0	20.65	2.3232237130876205
FBgn0041627	CG18801	Ku80	Ku80	103.0	-0.4392	41.0	-0.8707	37.0	1.0425	35.0	2.0863	27.0	-0.3218	243.0	-0.4219	168.0	-0.2361	84.0	0.5916	29.0	-1.3389	45.0	2.1996	54.0	2.0653	380.0	0.7322	19.0	20.0	18.0	20.0	21.0	21.0	18.0	19.0	20.0	20.0	21.0	19.0	20.0	19.0	21.0	19.0	19.0	19.0	18.0	21.0	19.6	1.0462967275611943
FBgn0043903	CG14226	domeless	dome	0.0	-4.7975	0.0	-4.3319	0.0	-6.2258	0.0	-2.0673	0.0	-2.2719	0.0	-5.6305	0.0	-3.7965	0.0	-3.8921	0.0	-2.528	0.0	-5.1118	0.0	-2.3219	0.0	-7.2512	0.0	0.0	0.0	0.0	0.0	0.0	0.0	0.0	0.0	0.0	0.0	0.0	0.0	0.0	0.0	0.0	0.0	0.0	0.0	0.0	0.0	0.0
FBgn0086613	CG31212	INO80 complex subunit	Ino80	76.0	1.0004	101.0	0.4964	47.0	-0.2826	53.0	1.1802	46.0	1.6361	323.0	1.8794	37.0	-2.5901	74.0	-1.3611	38.0	-1.1549	42.0	-1.2299	39.0	-0.4341	230.0	-2.7195	20.0	16.0	18.0	20.0	20.0	22.0	17.0	19.0	18.0	20.0	20.0	21.0	17.0	20.0	18.0	18.0	17.0	19.0	20.0	18.0	18.9	1.5525869752736796
FBgn0260632	CG6667	dorsal	dl	43.0	-2.2282	91.0	2.7201	25.0	-1.2028	8.0	-1.3451	24.0	0.1496	191.0	-1.1588	166.0	1.3575	72.0	1.024	23.0	-0.5679	45.0	1.4932	34.0	2.4453	340.0	3.6414	19.0	23.0	20.0	19.0	19.0	19.0	19.0	22.0	20.0	24.0	19.0	21.0	18.0	18.0	21.0	20.0	19.0	23.0	21.0	19.0	20.15	1.7252002172135517
FBgn0261014	CG2331	-	TER94	100.0	-1.7583	58.0	0.6637	33.0	0.1431	32.0	-0.2774	45.0	0.7759	268.0	-0.5979	35.0	-2.5883	39.0	-0.2415	18.0	-0.5369	26.0	0.1344	19.0	-0.8428	137.0	-0.925	20.0	18.0	19.0	18.0	18.0	18.0	21.0	21.0	16.0	16.0	21.0	16.0	22.0	22.0	22.0	20.0	19.0	25.0	22.0	24.0	19.9	2.573140616363386
FBgn0262029	CG42840	dachs	d	0.0	-1.7265	60.0	0.4348	9.0	-2.1963	20.0	-0.4296	13.0	-1.0333	102.0	-3.332	105.0	-0.1004	69.0	0.9243	15.0	-0.9885	20.0	-0.8111	3.0	-2.0669	212.0	-0.6036	20.0	23.0	22.0	25.0	21.0	26.0	24.0	20.0	21.0	20.0	22.0	21.0	17.0	19.0	22.0	21.0	20.0	21.0	22.0	21.0	21.4	2.0365088806711924
FBgn0263396	CG16901	squid	sqd	178.0	2.4616	96.0	2.9566	26.0	-0.6585	20.0	-1.4881	28.0	-1.5181	348.0	2.1751	78.0	1.7935	58.0	1.0329	42.0	2.531	37.0	0.8735	42.0	1.1352	257.0	1.7824	18.0	19.0	22.0	18.0	21.0	26.0	17.0	20.0	19.0	24.0	20.0	23.0	23.0	21.0	19.0	21.0	22.0	25.0	21.0	19.0	20.9	2.4257391711220295
FBgn0027619	CG12131	eukaryotic translation initiation factor 3 subunit j	eIF3j
[truncated: 28 more columns]
