# Supplementary figures and images for: Topology-driven protein-protein interaction network analysis detects genetic sub-networks regulating reproductive capacity
Source: eLife journal article supplement (doi:10.7554/elife.54082), 2020-09-09

a. Network modules predicted by SCA

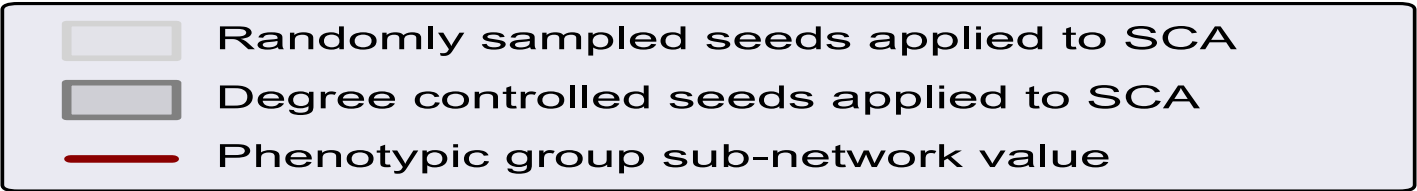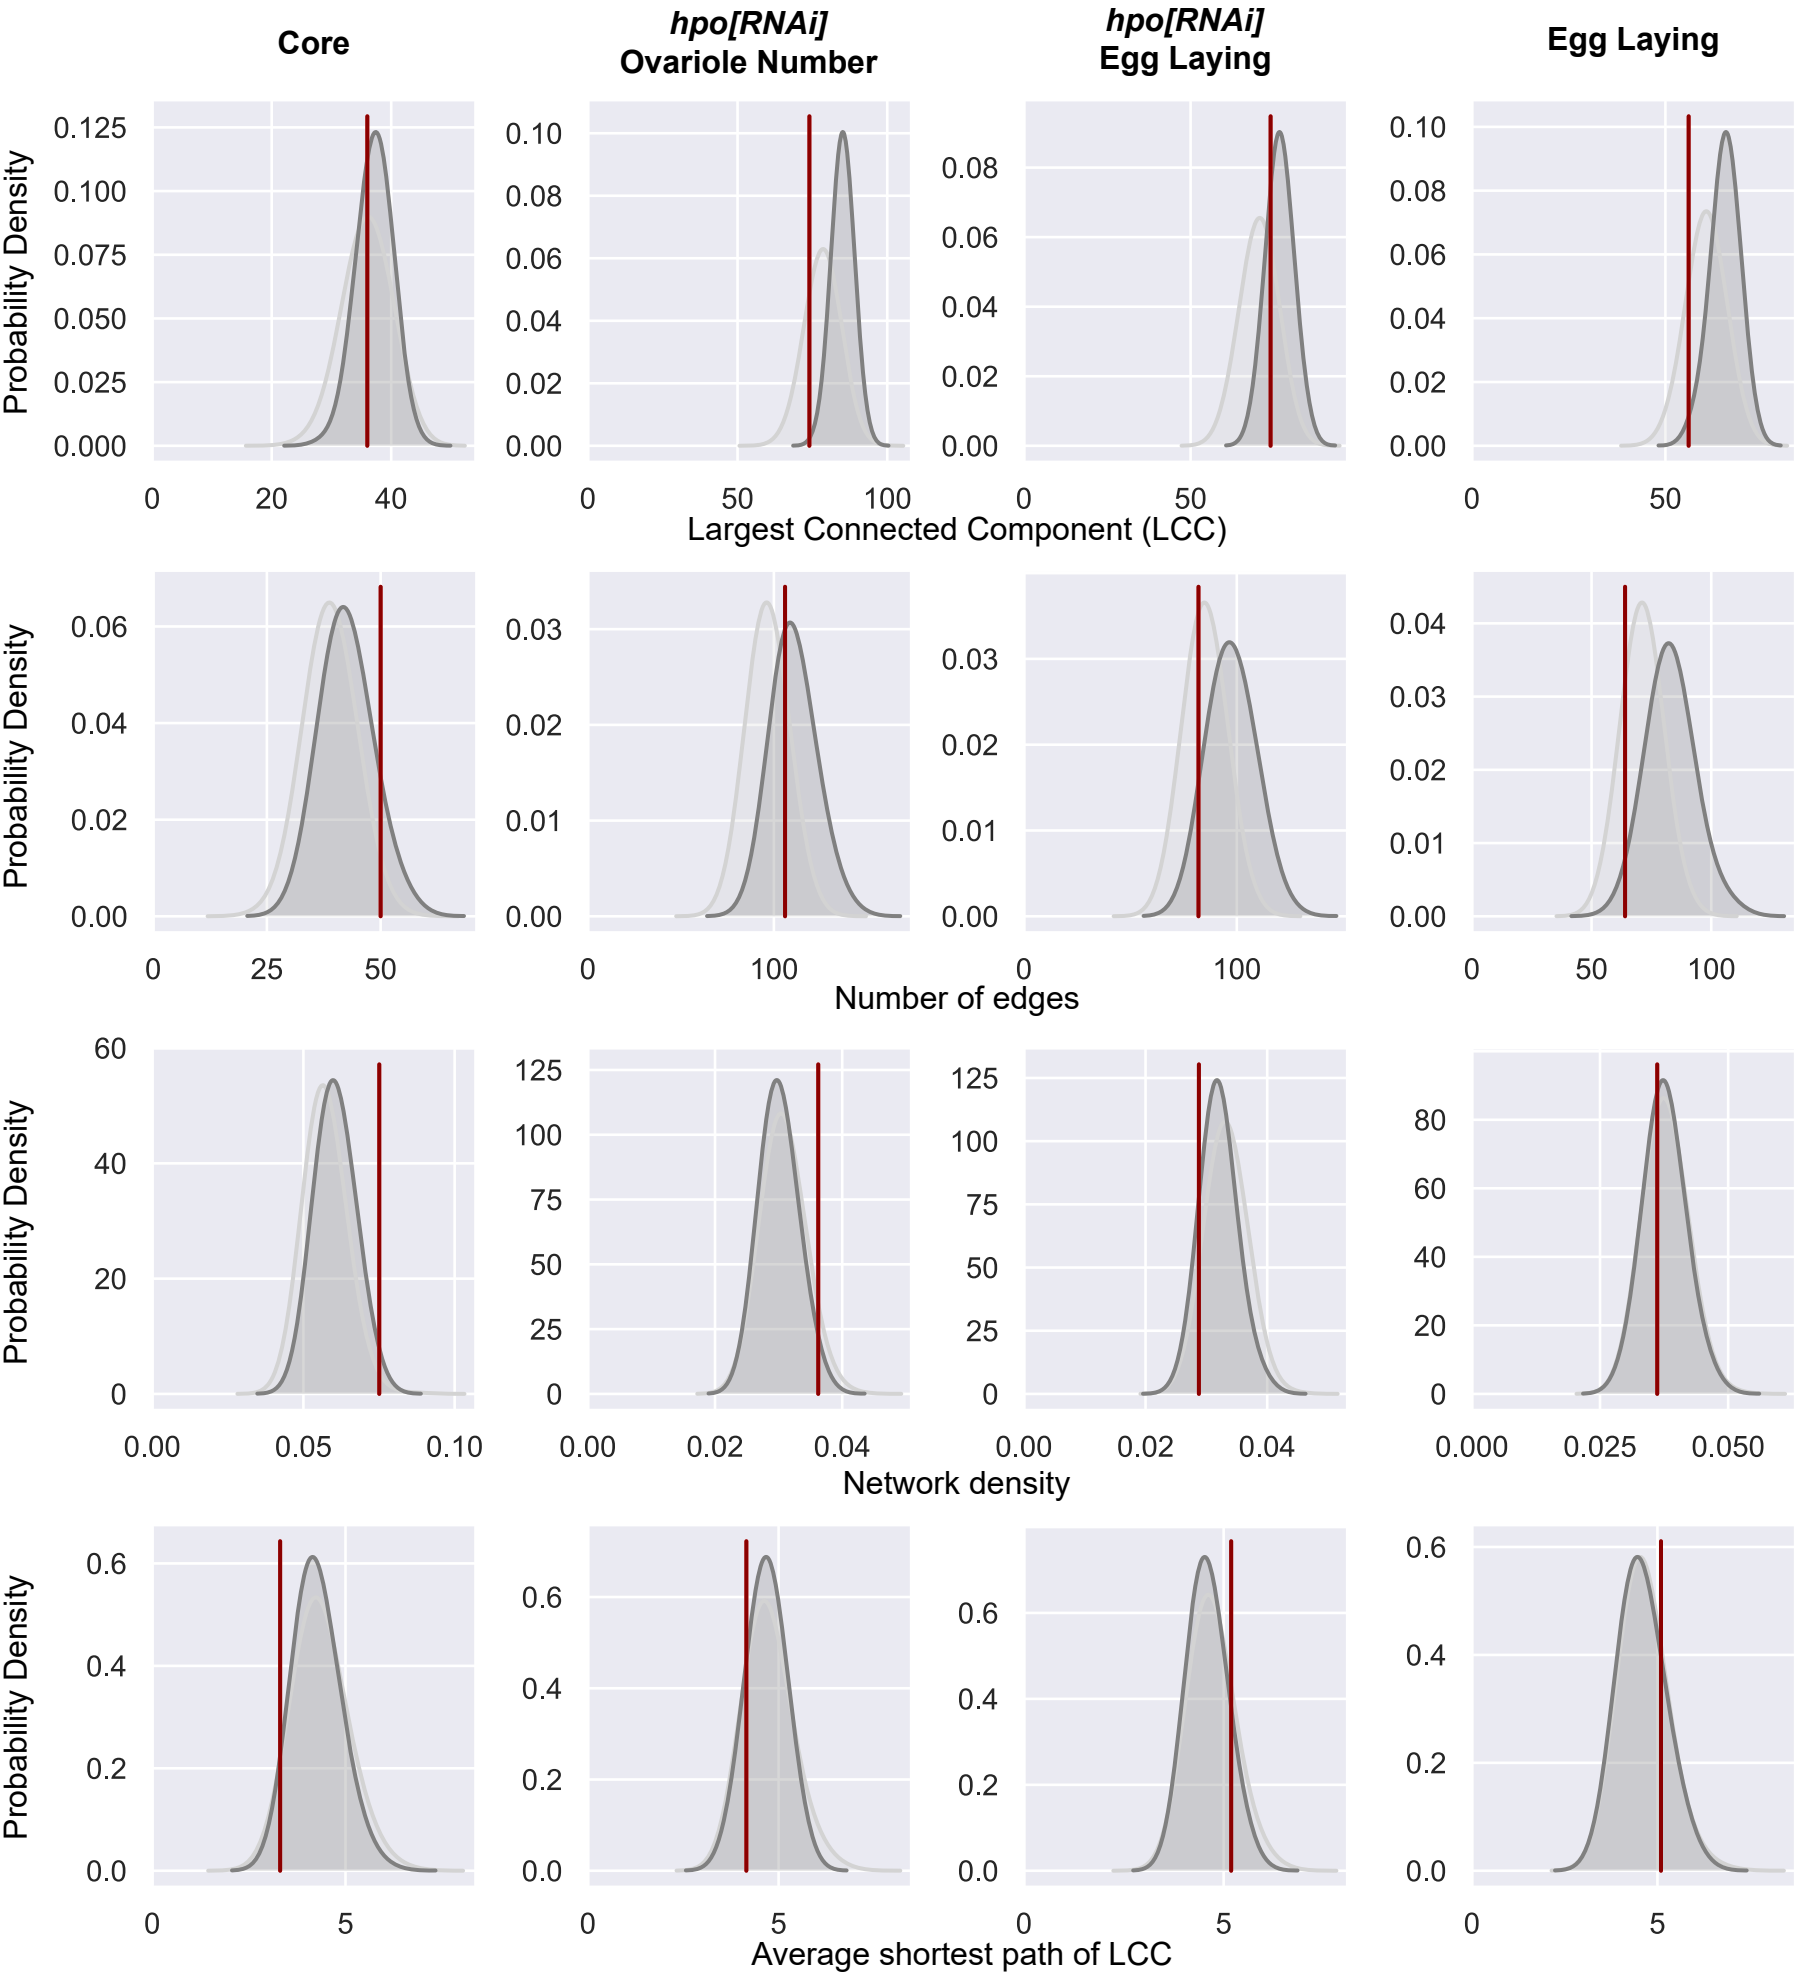

Supplement: supp [file elife-54082-supp-v1.zip]

Fig 3 Supp 2

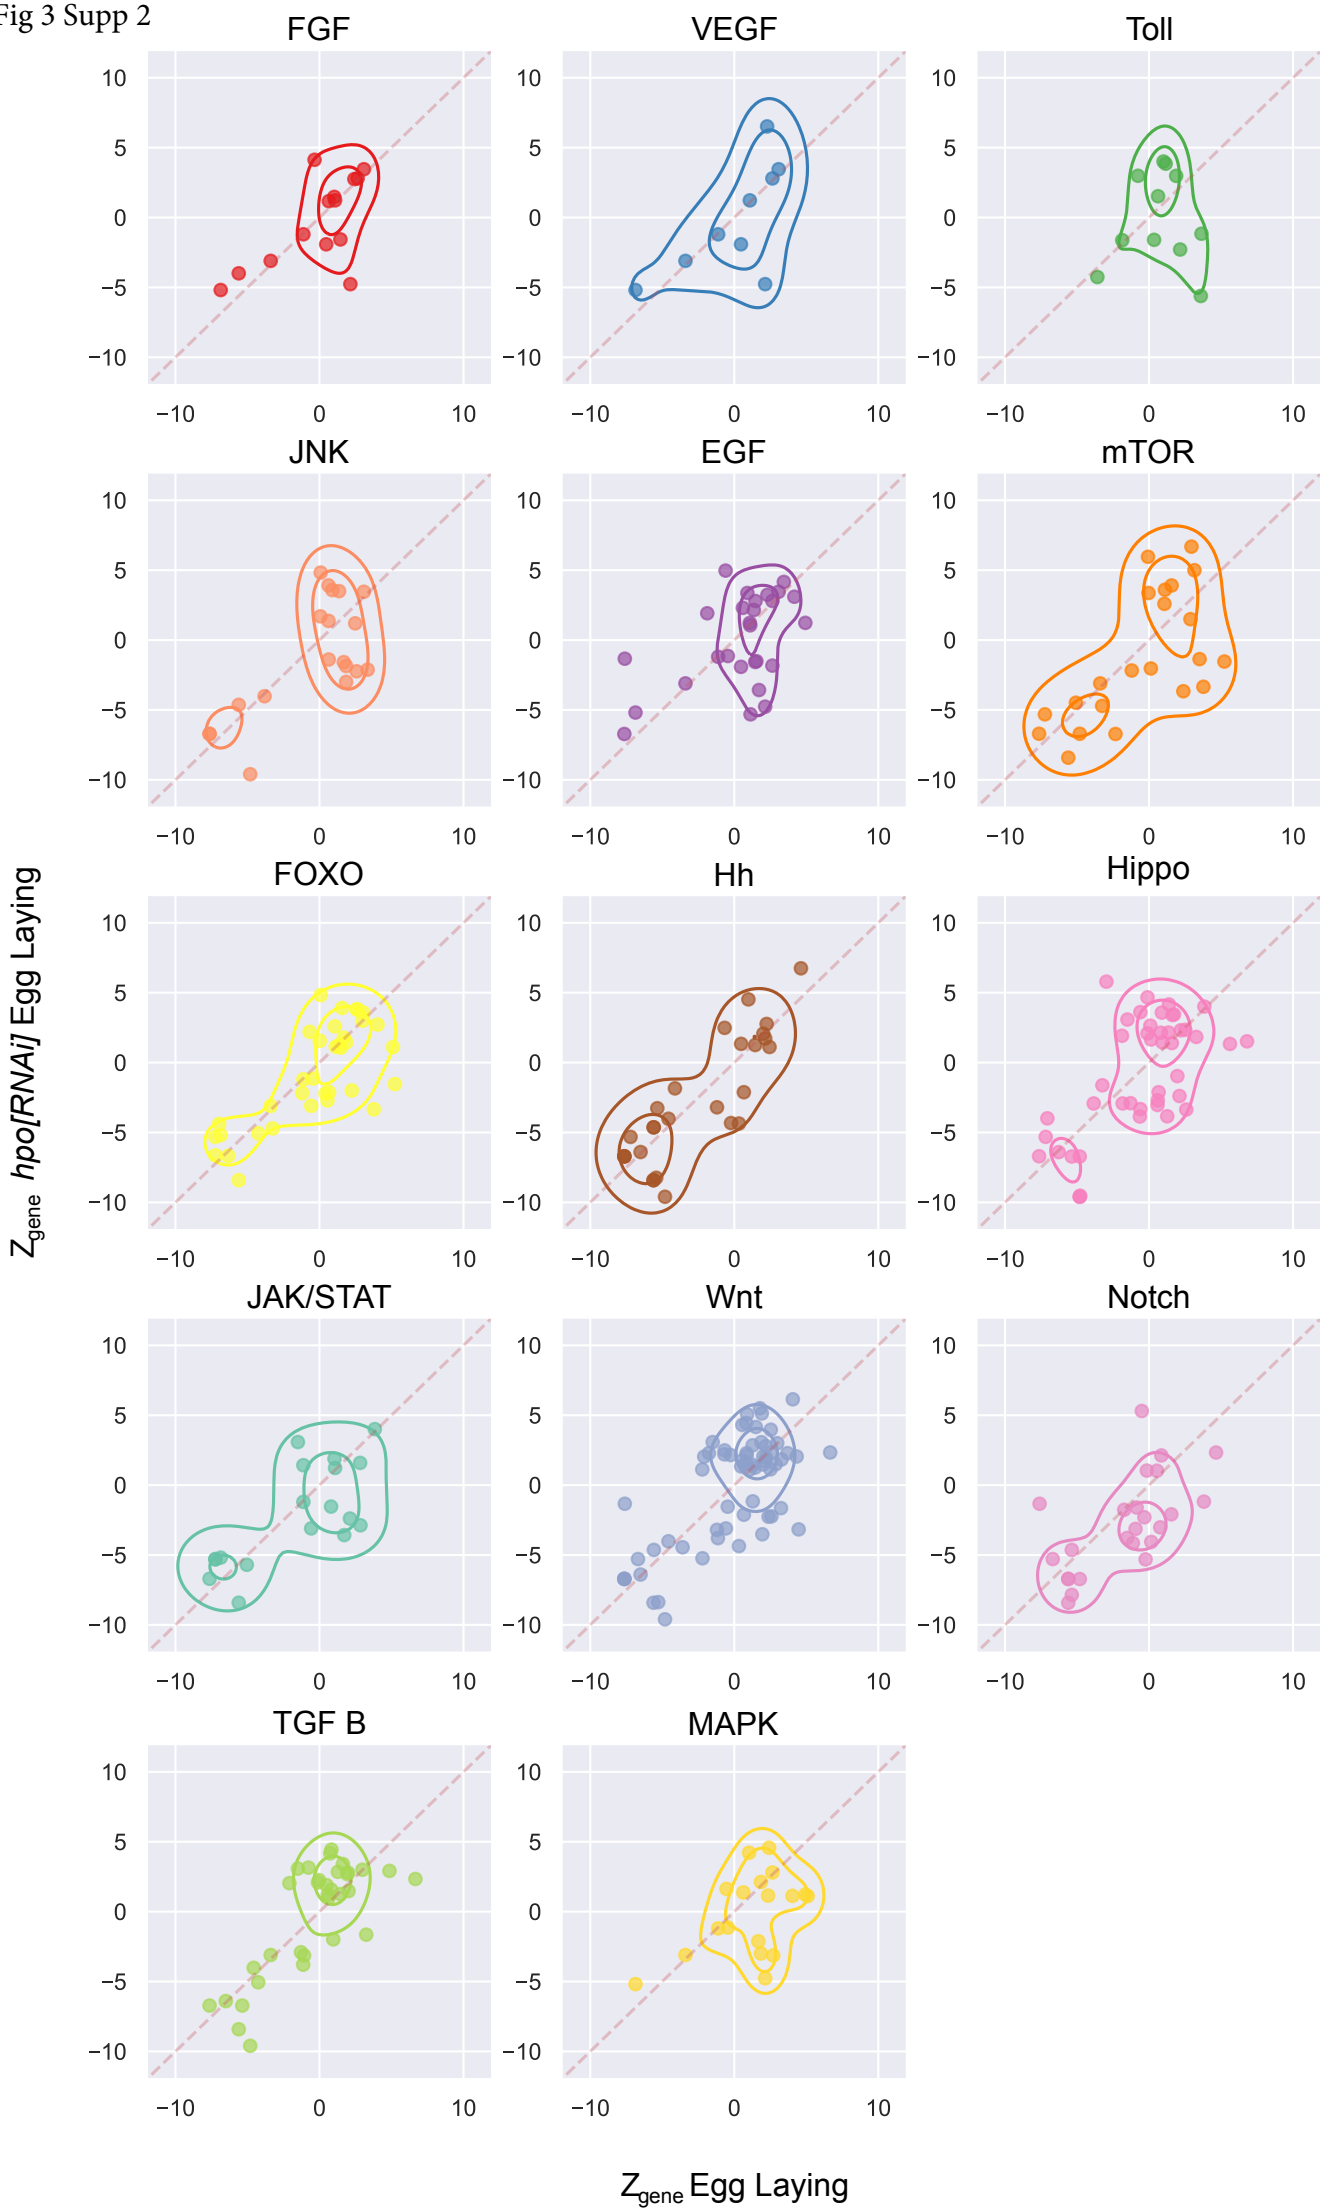

Supplement: supp [file elife-54082-supp-v1.zip]

**a**

Seeds

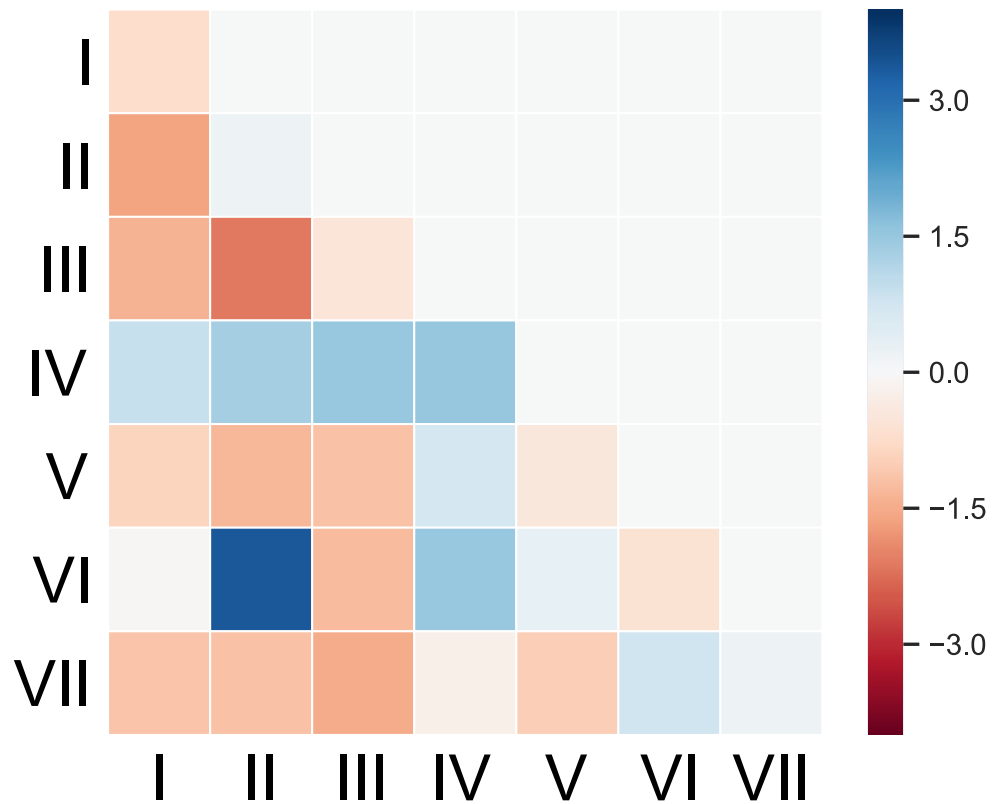**b**

Seeds + Connectors

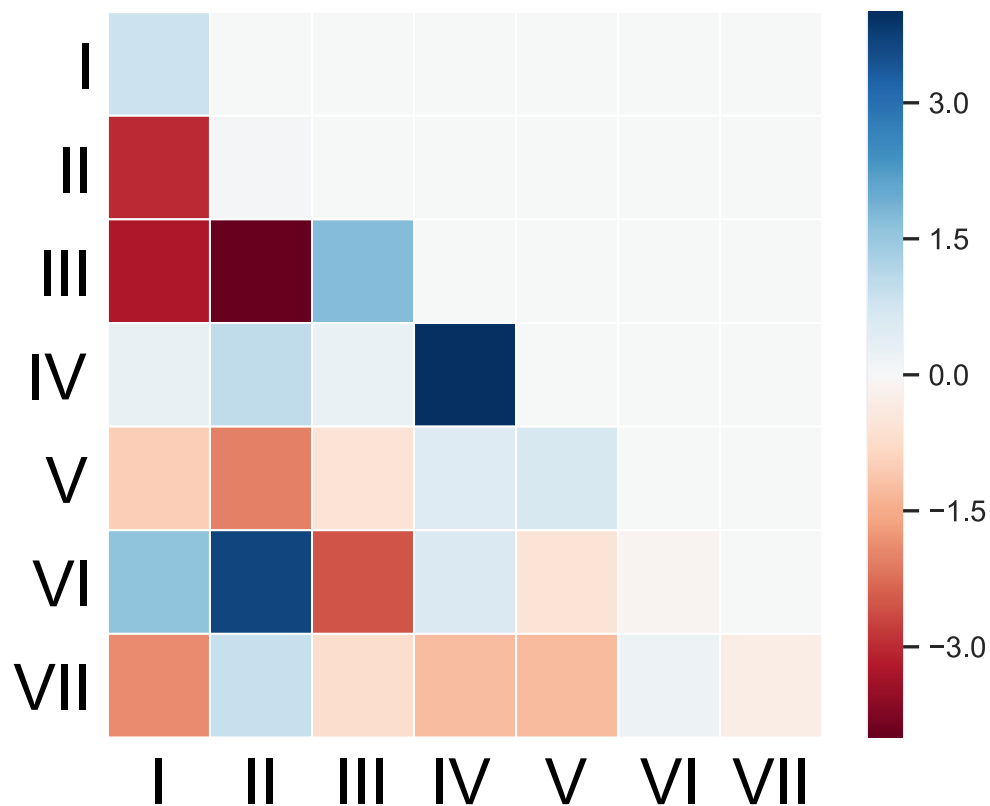

Supplement: supp [file elife-54082-supp-v1.zip]

### a. *hpo*[RNAi] Egg Laying

Fig 1 Supp 1

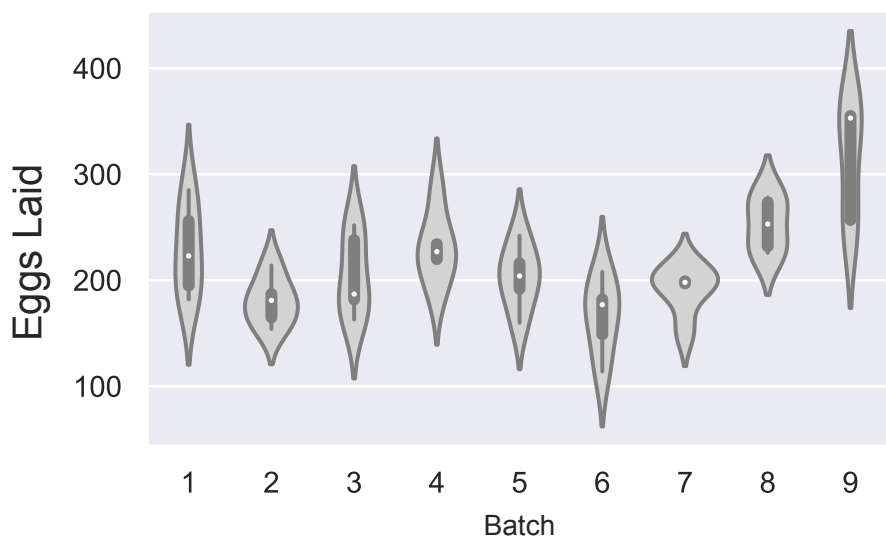

### b. Egg Laying

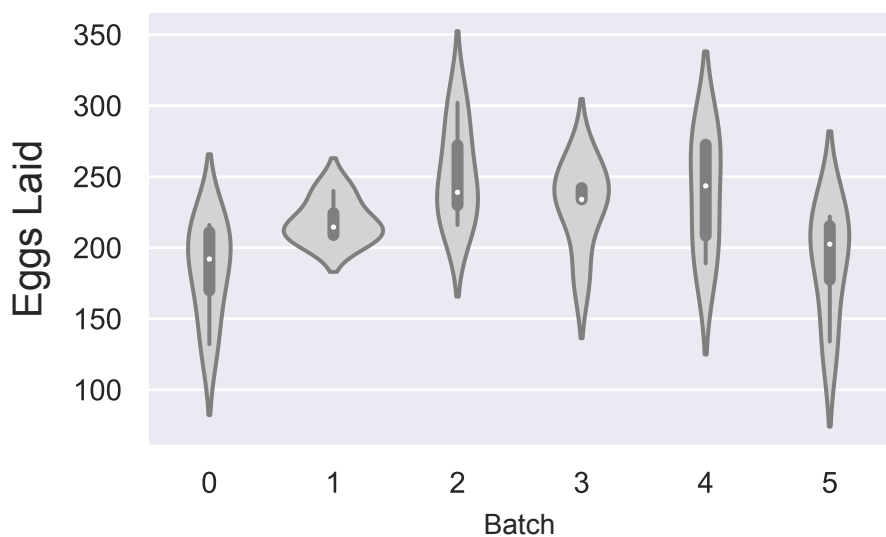

### c. *hpo*[RNAi] Ovariole Number

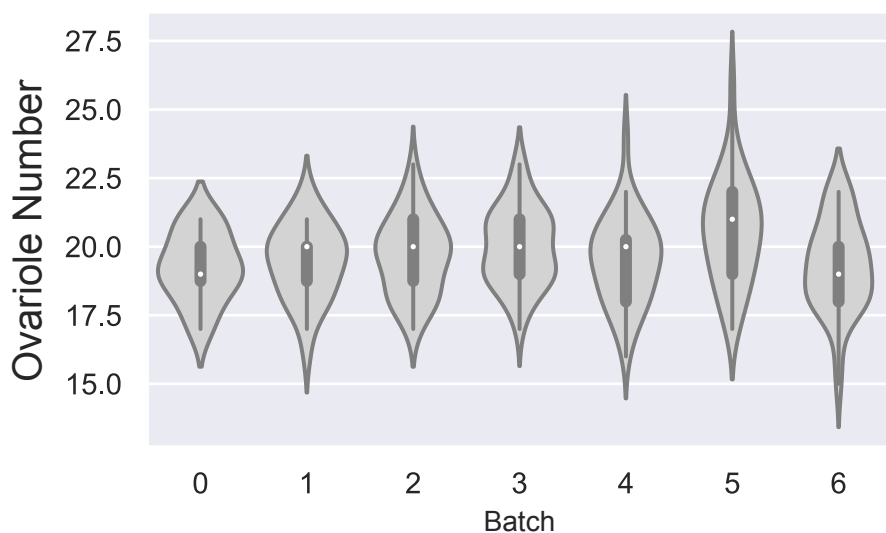

Supplement: supp [file elife-54082-supp-v1.zip › elife_poa_e54082_Figure_1_figure_supplement_1.pdf]

Selected candidates

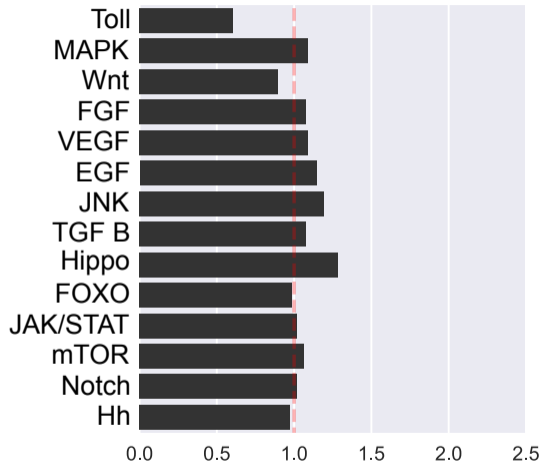*hpo*[RNAi] Ovariole Number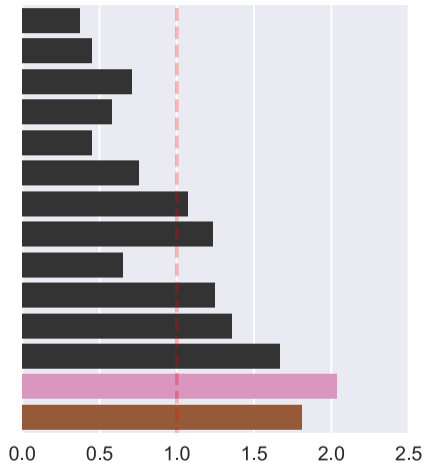

Egg Laying

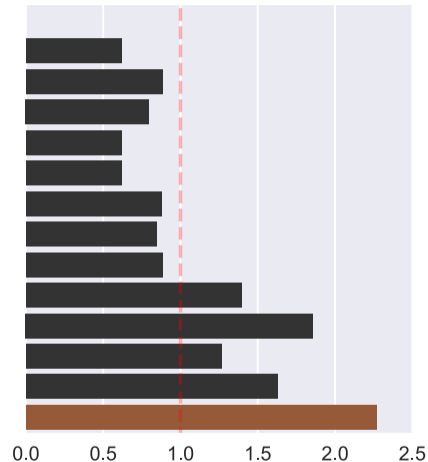

Fold Enrichment

Supplement: supp [file elife-54082-supp-v1.zip › elife_poa_e54082_Figure_3_figure_supplement_1.pdf]

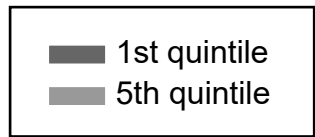

### a. *hpo*[RNAi] Egg Laying

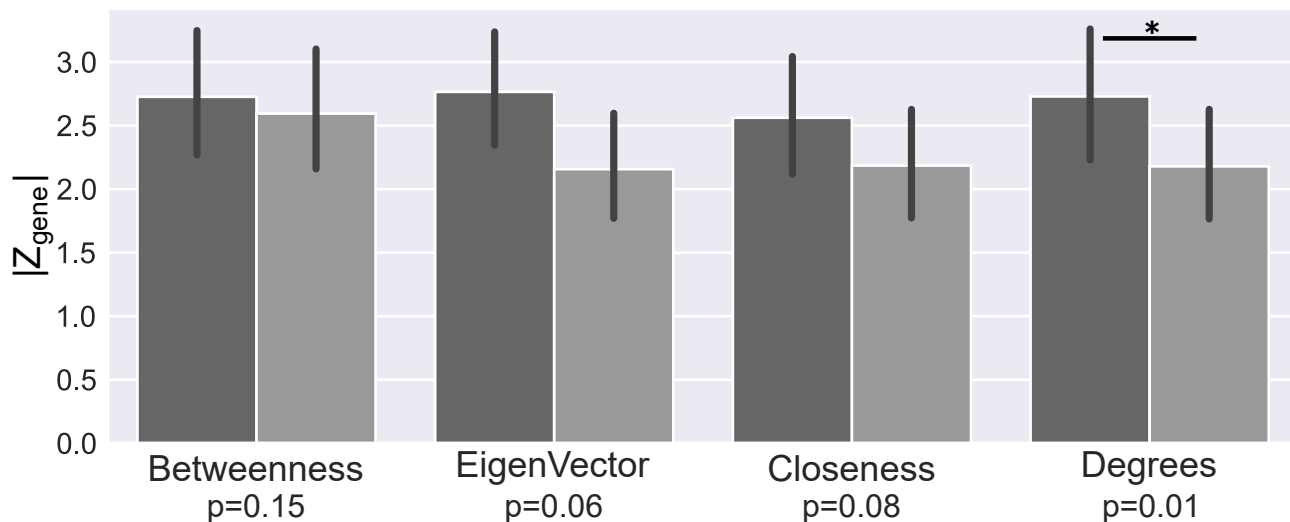

### b. Egg Laying

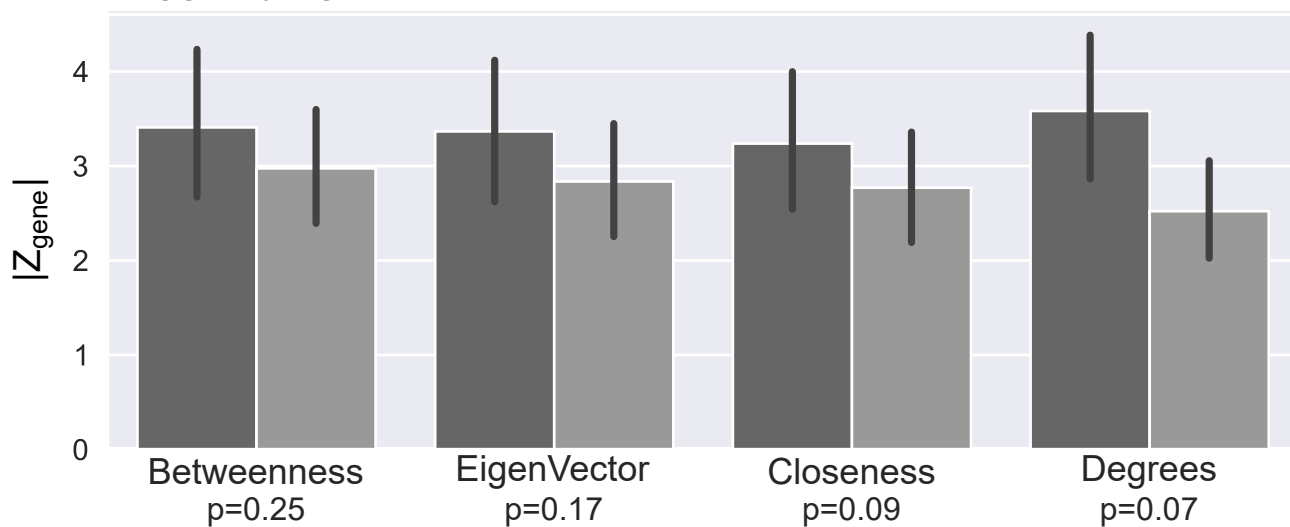

### c. *hpo*[RNAi] Ovariole Number

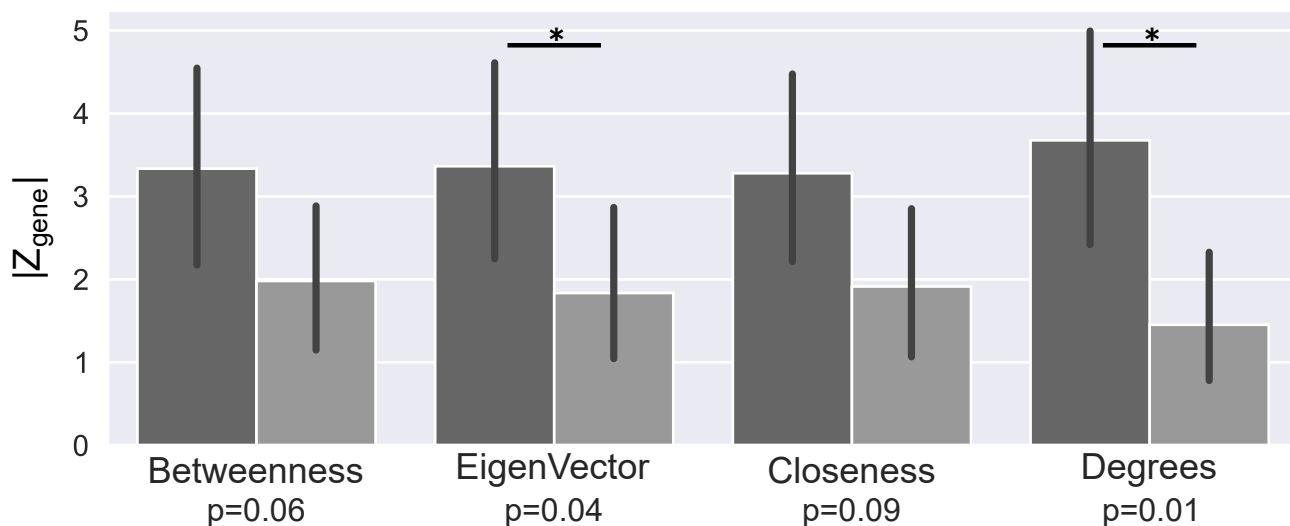

Supplement: supp [file elife-54082-supp-v1.zip › elife_poa_e54082_Figure_4_figure_supplement_2.pdf]

a. Screened gene background

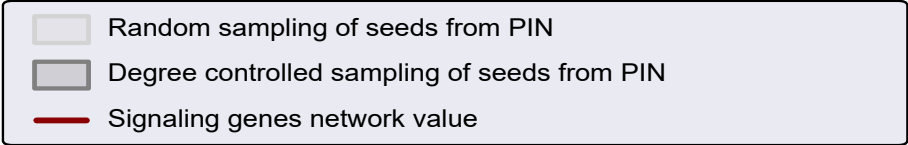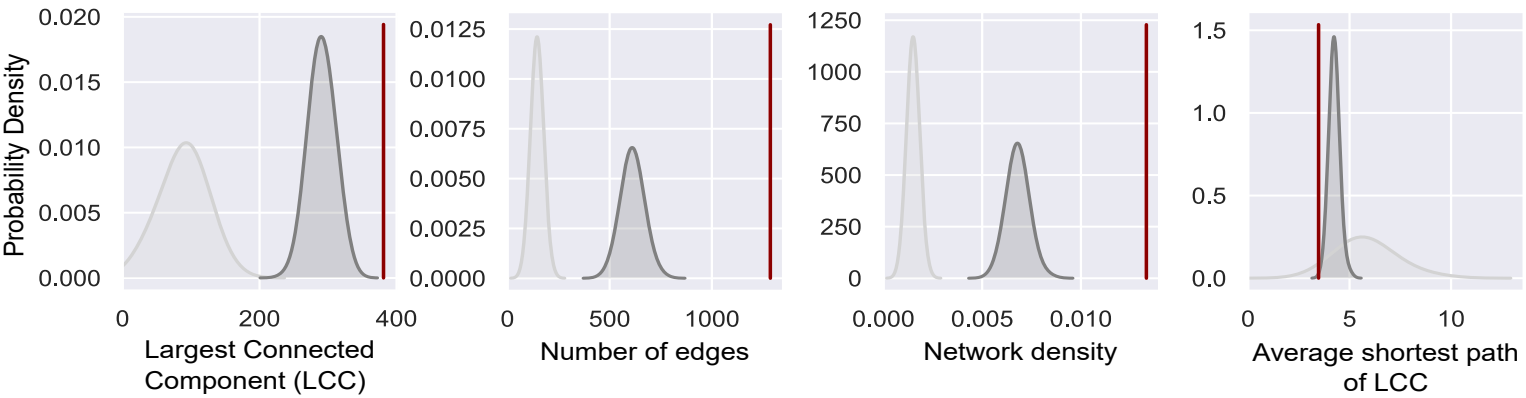

b. Phenotypic sub-networks

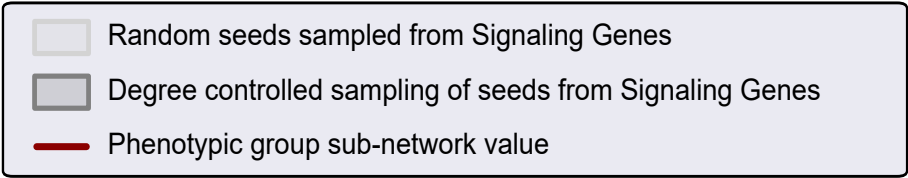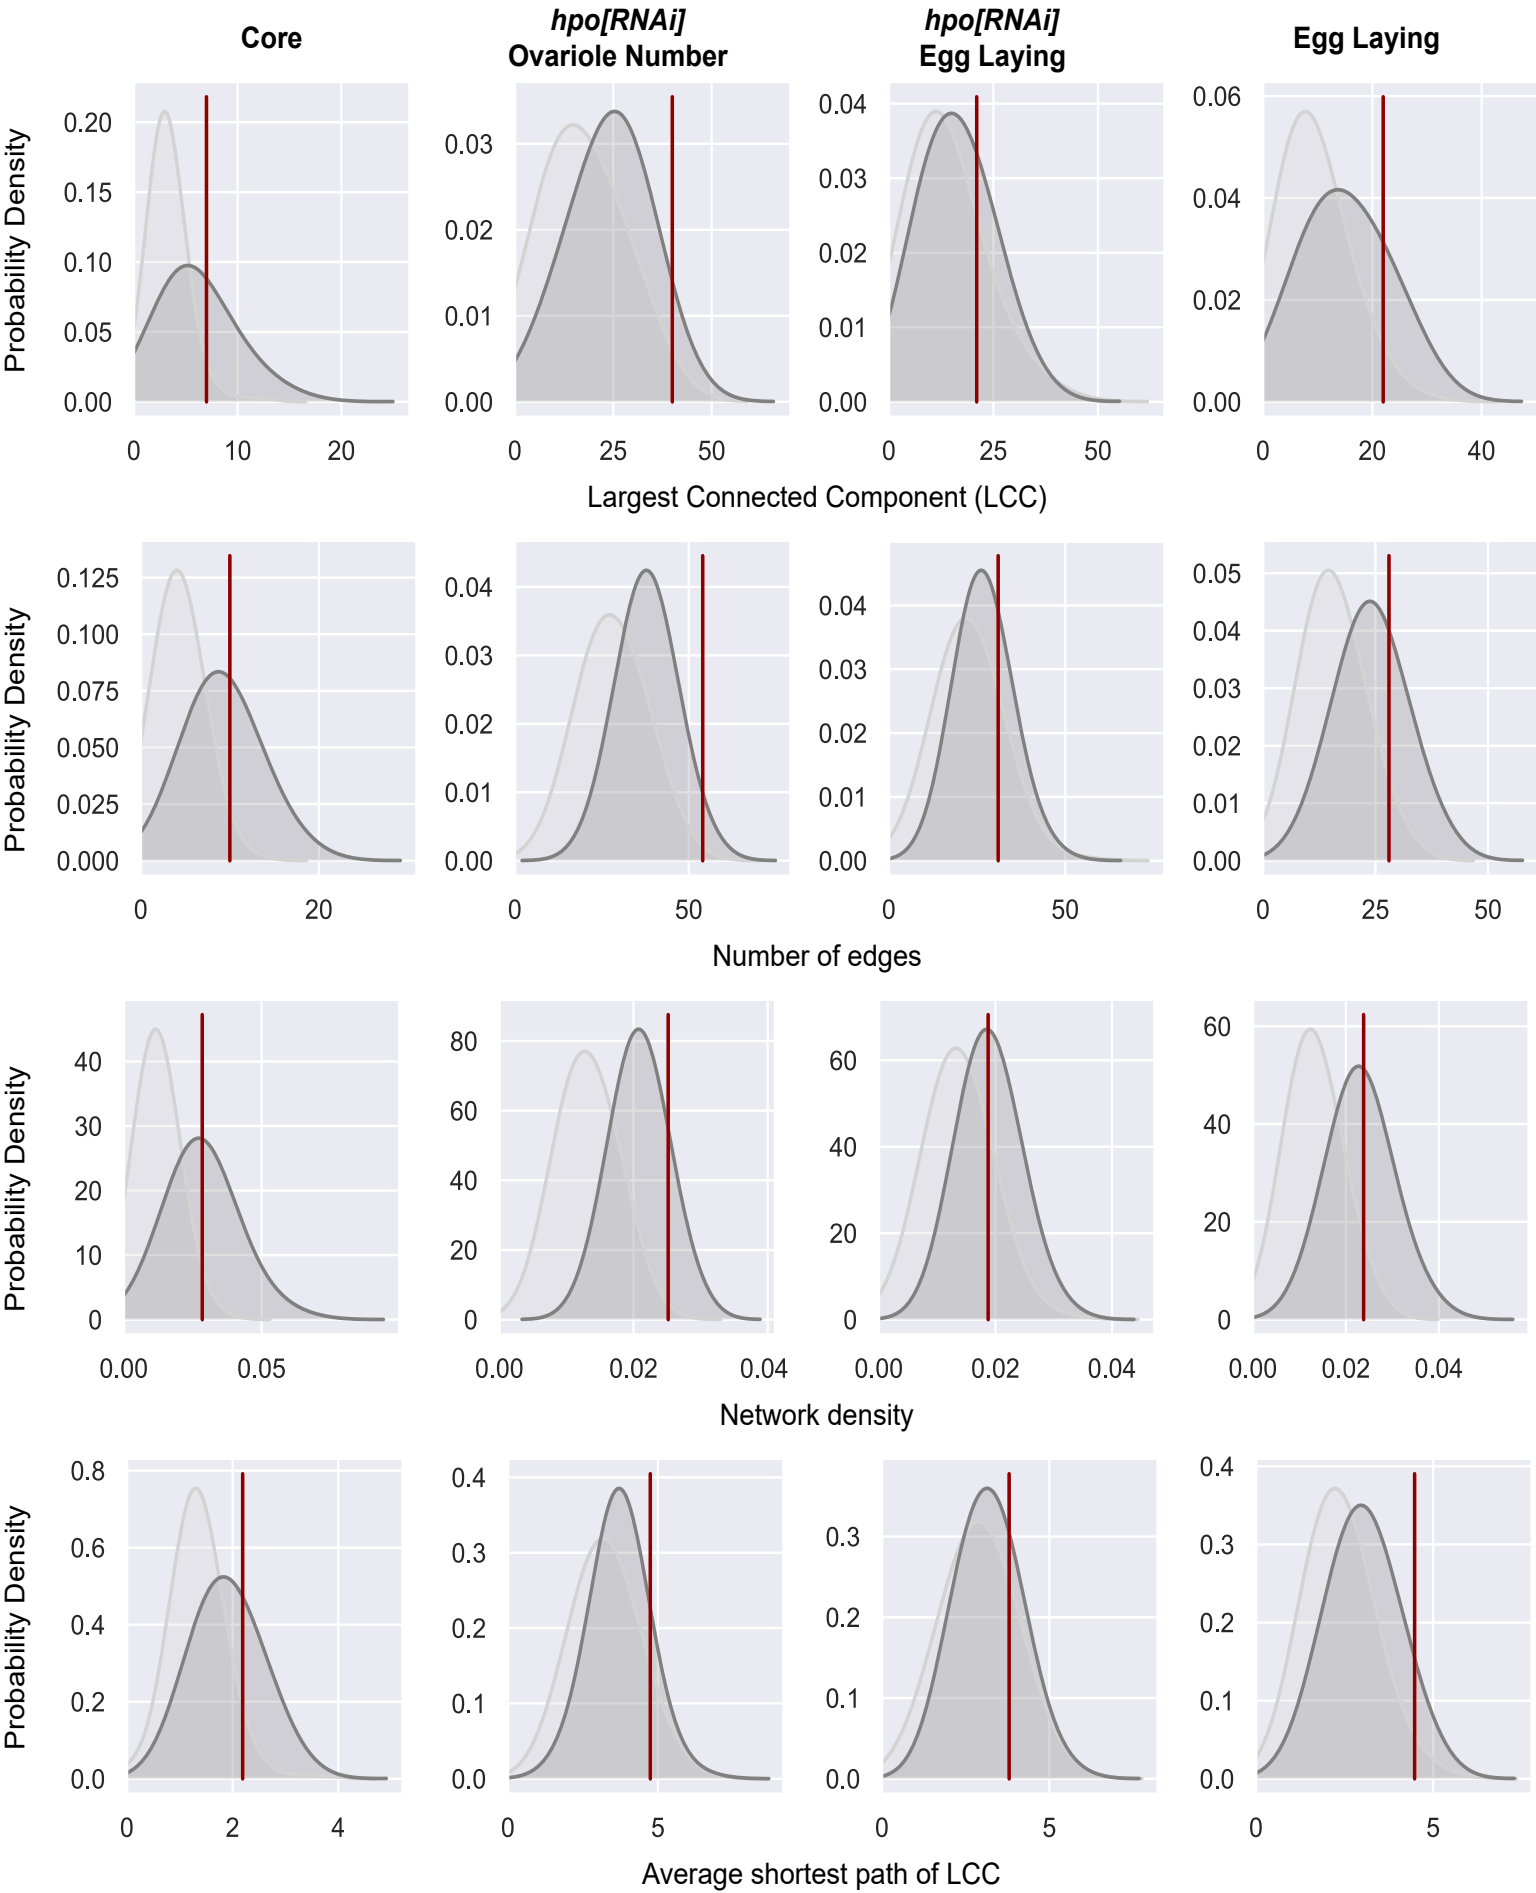

Supplement: supp [file elife-54082-supp-v1.zip › elife_poa_e54082_Figure_4_figure_supplement_3.pdf]

# Egg Laying Module

Fig 5 Supp 2

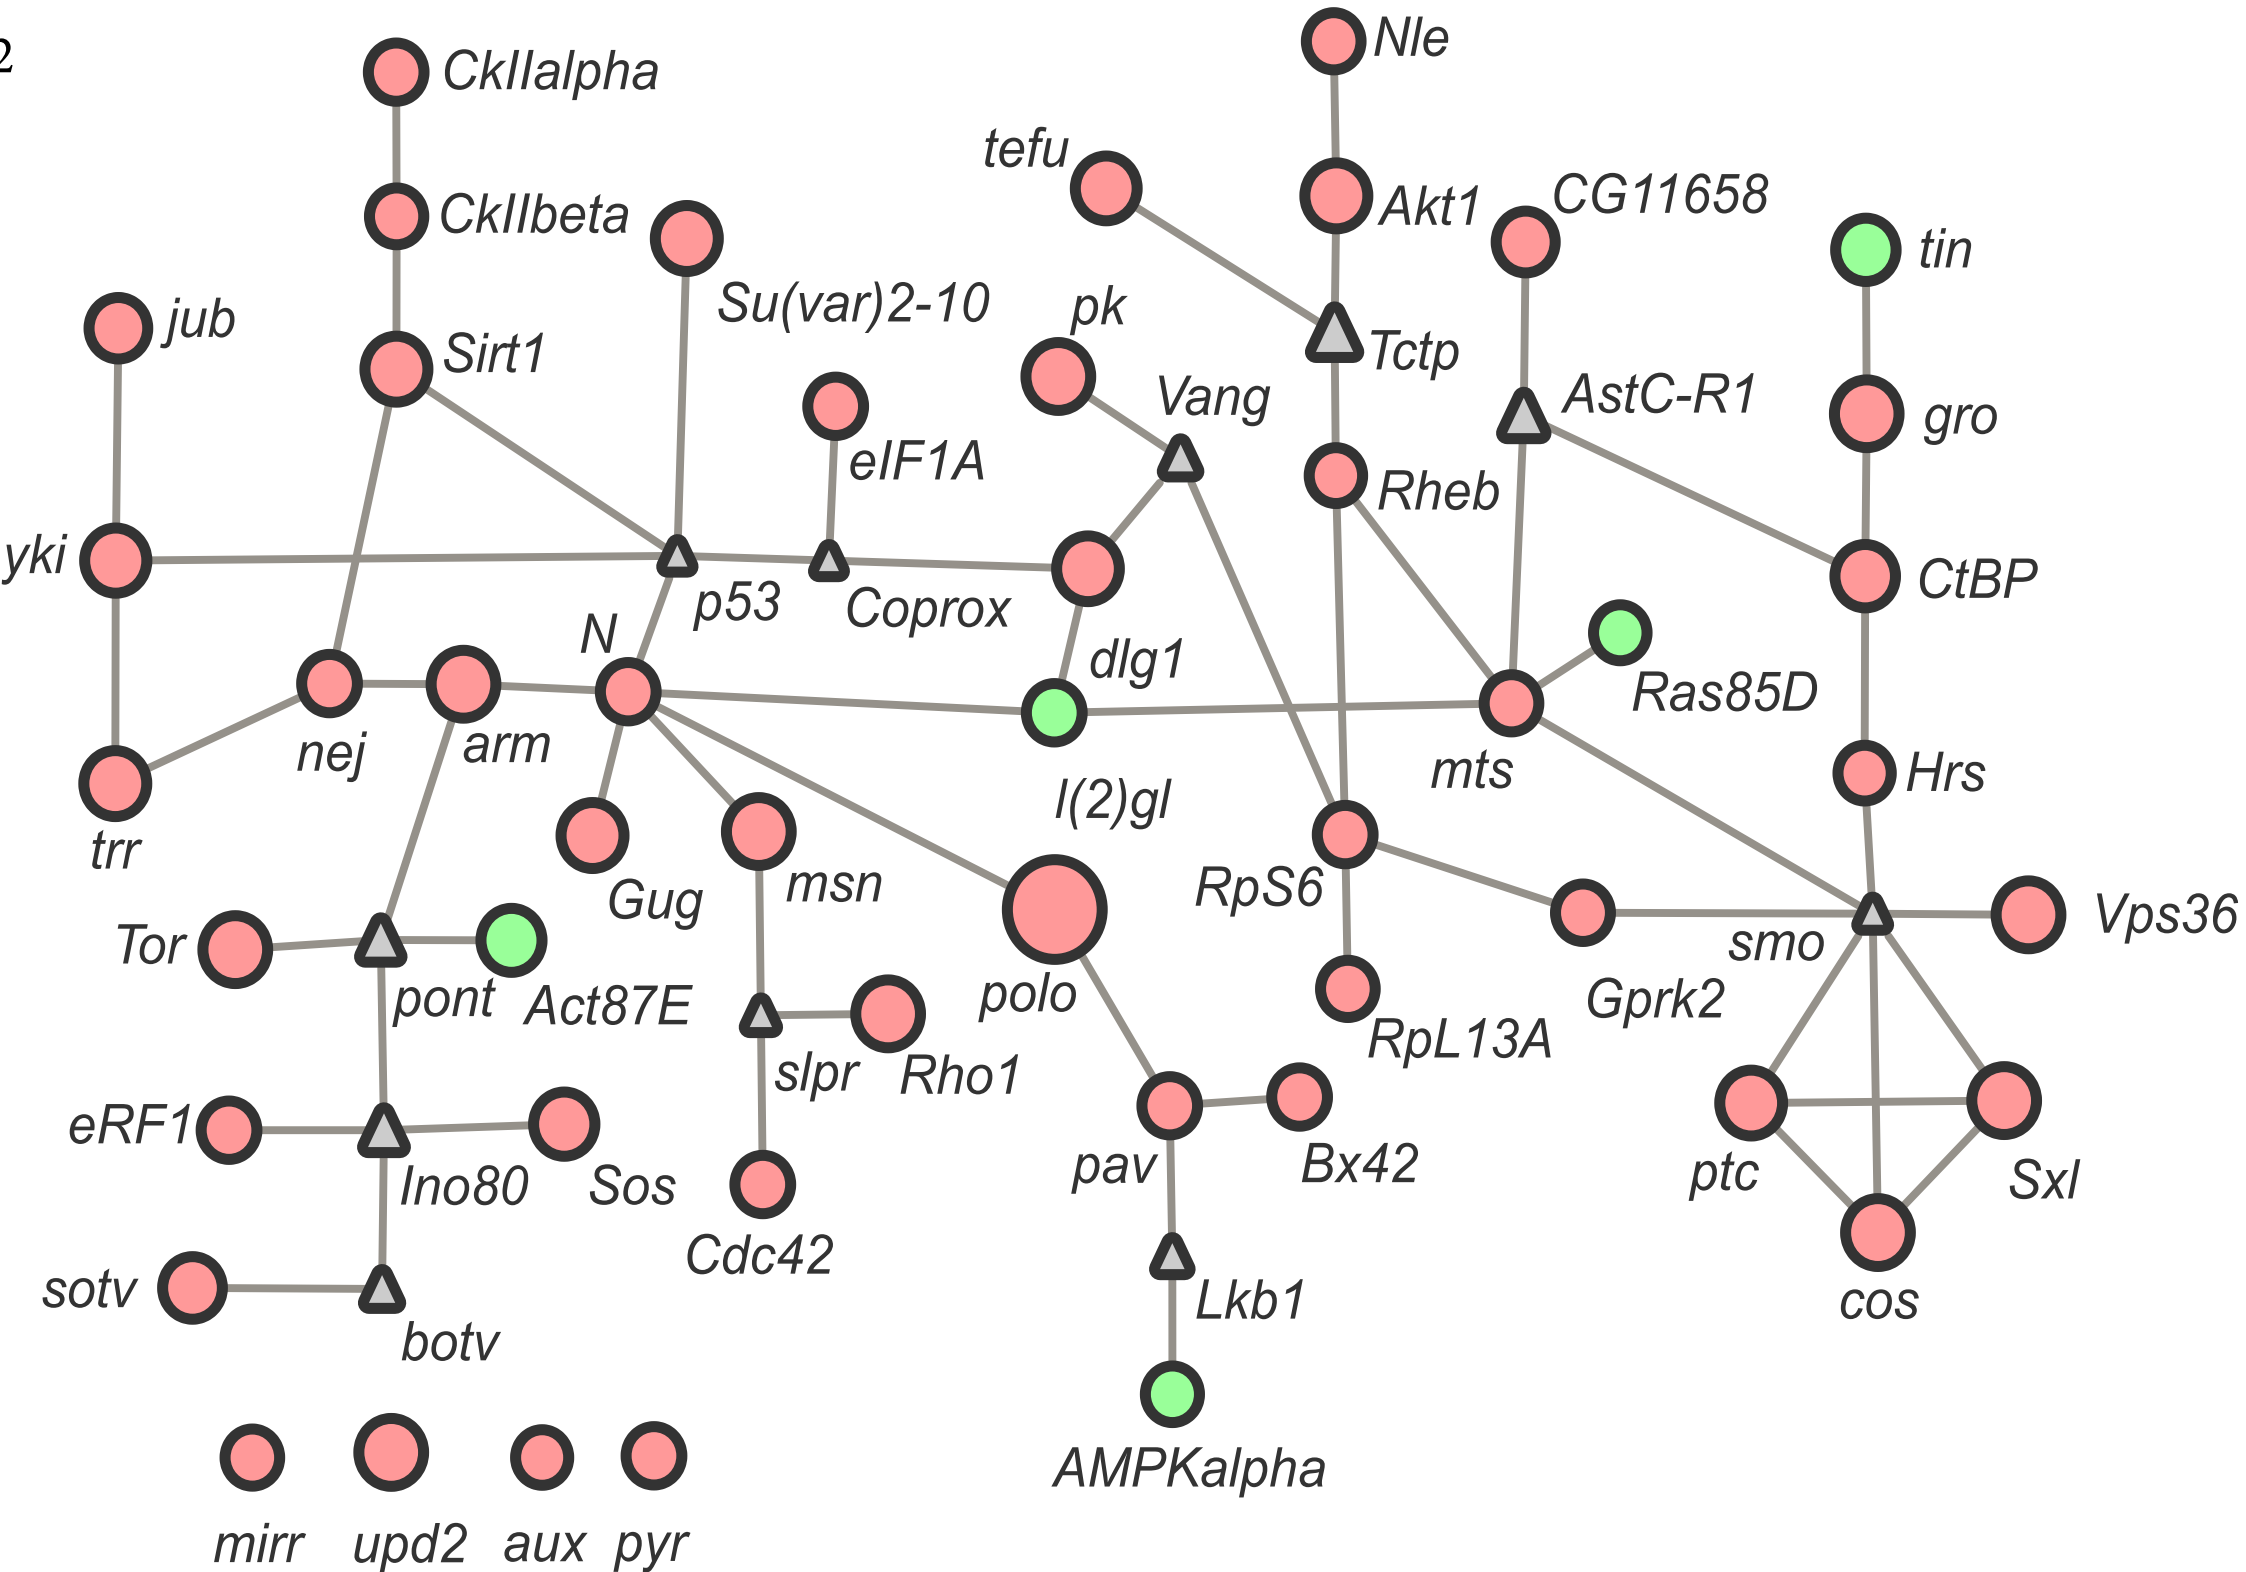

Supplement: supp [file elife-54082-supp-v1.zip › elife_poa_e54082_Figure_5_figure_supplement_2.pdf]

# *hpo[RNAi]* Ovariole Number Module

Fig 5 Supp 3

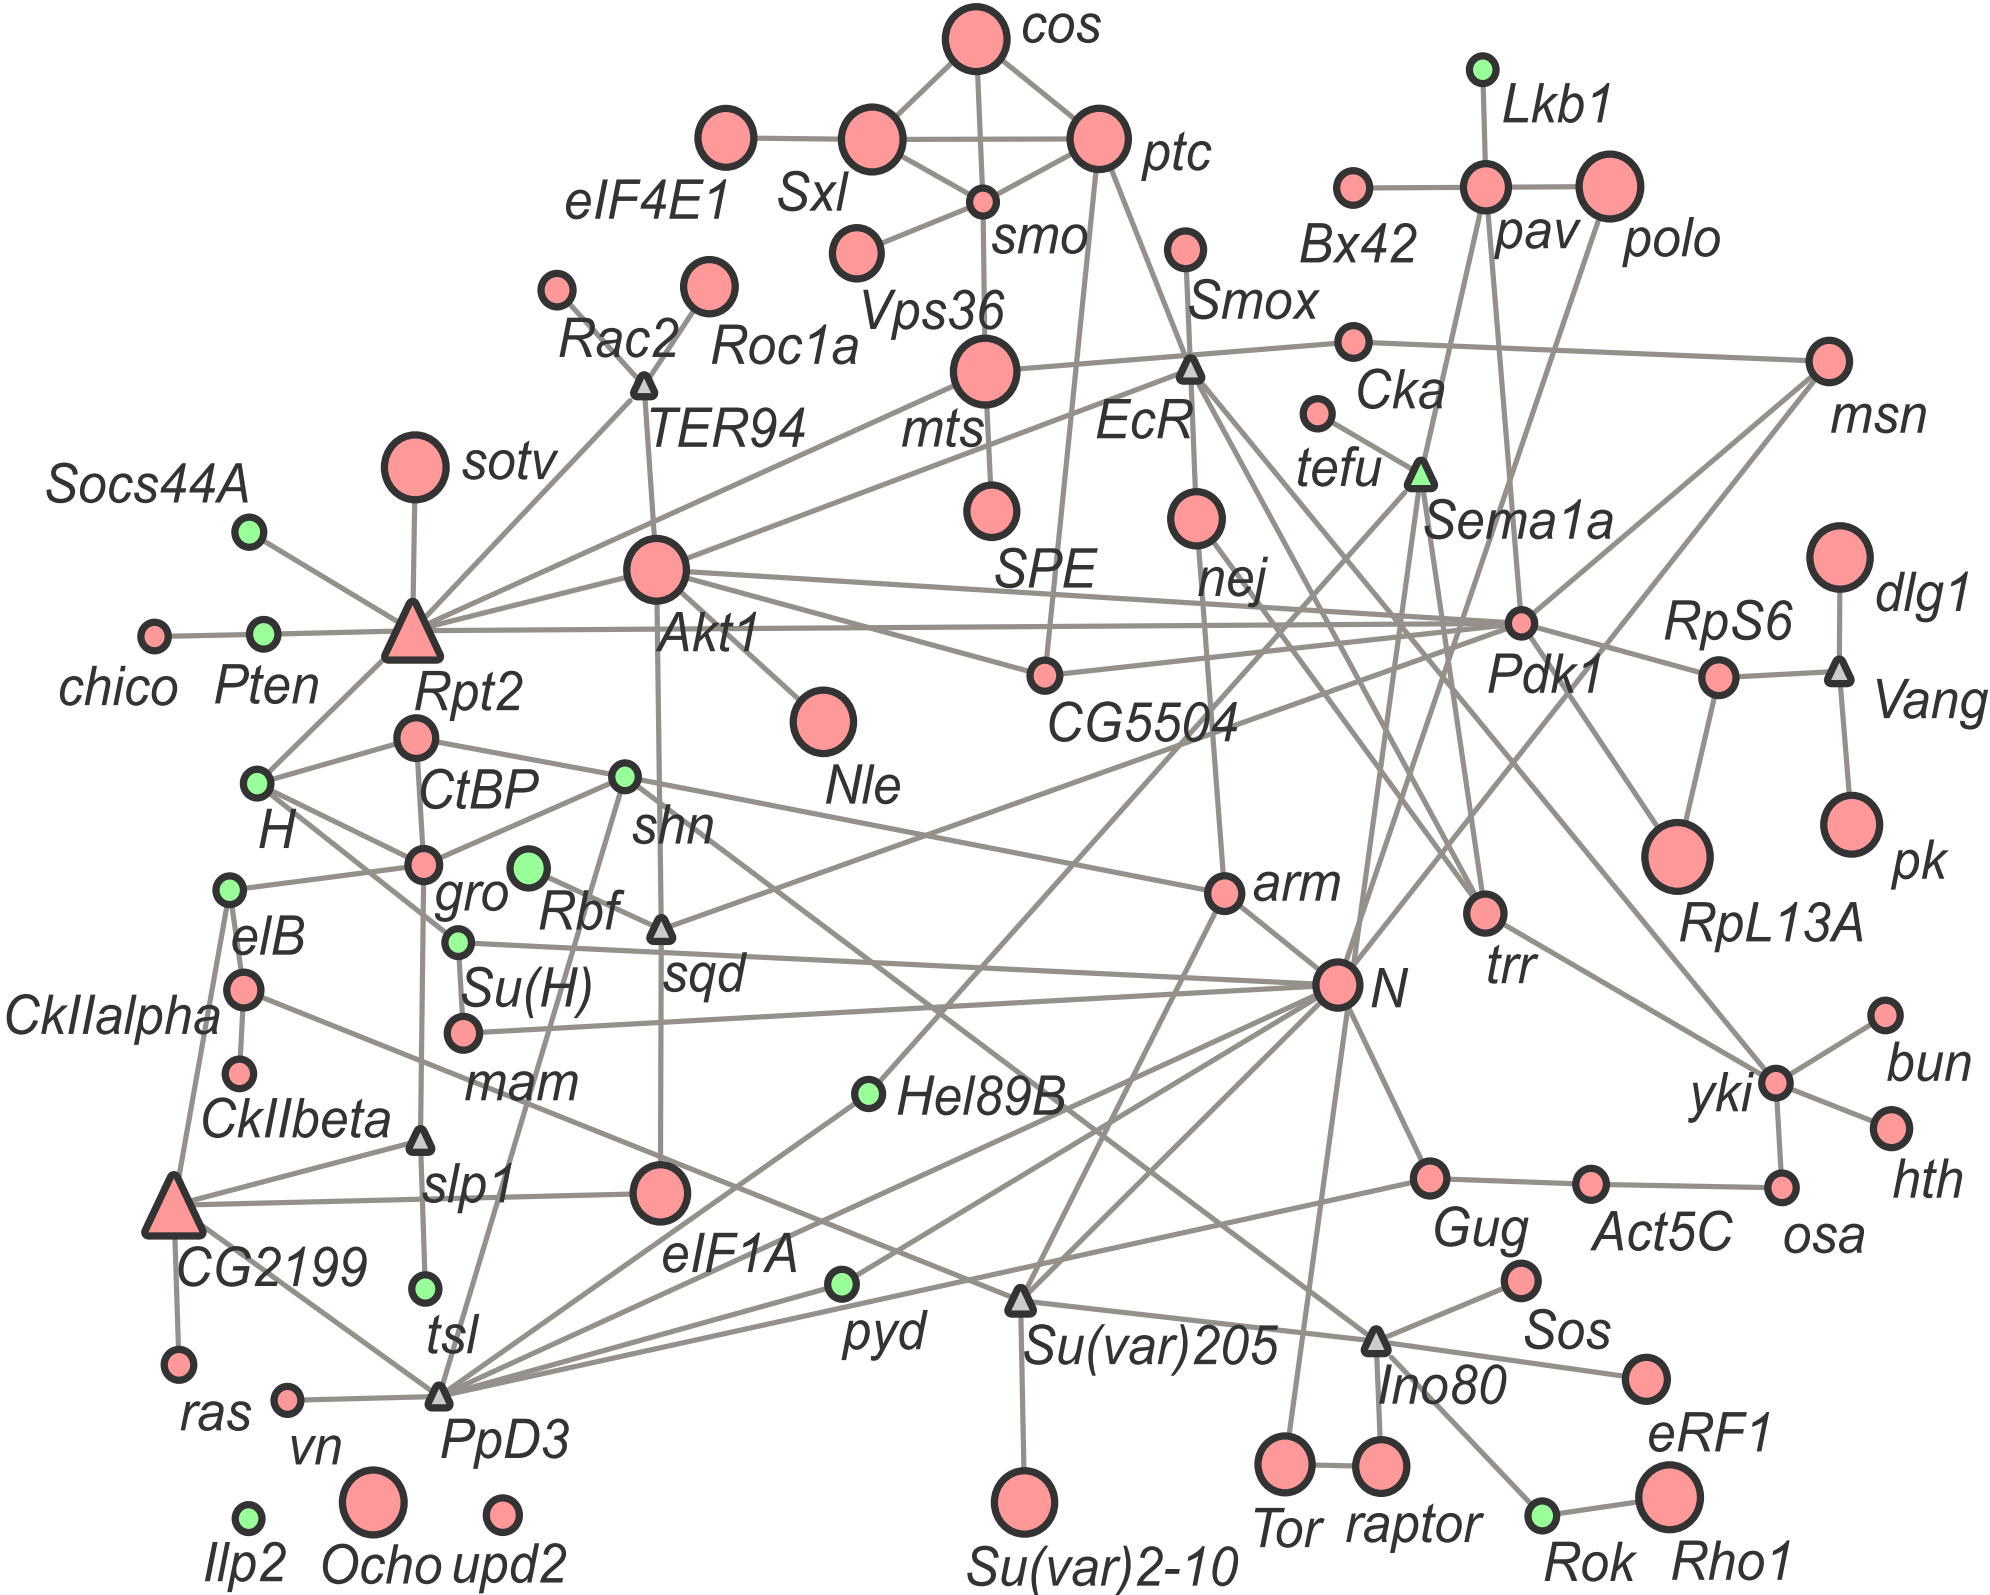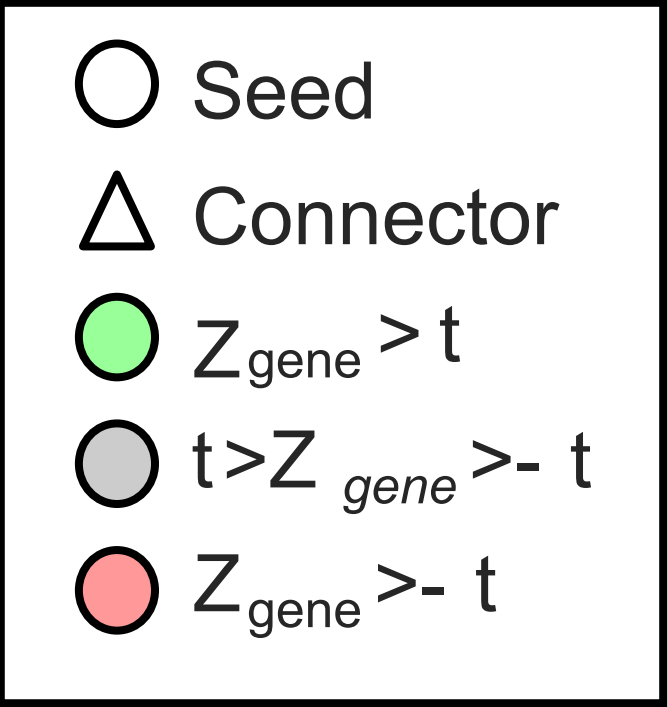

Supplement: supp [file elife-54082-supp-v1.zip › elife_poa_e54082_Figure_5_figure_supplement_3.pdf]

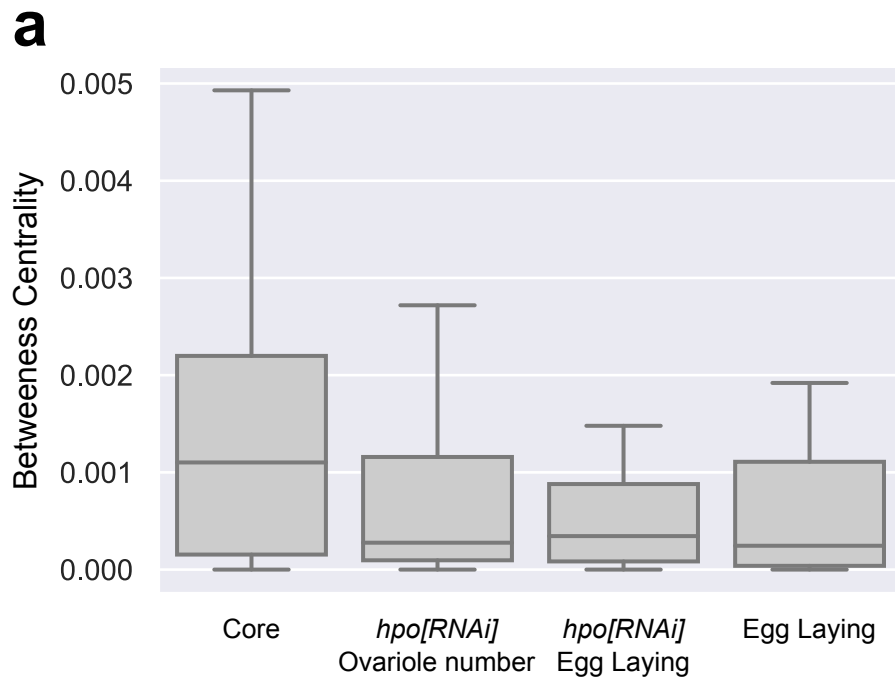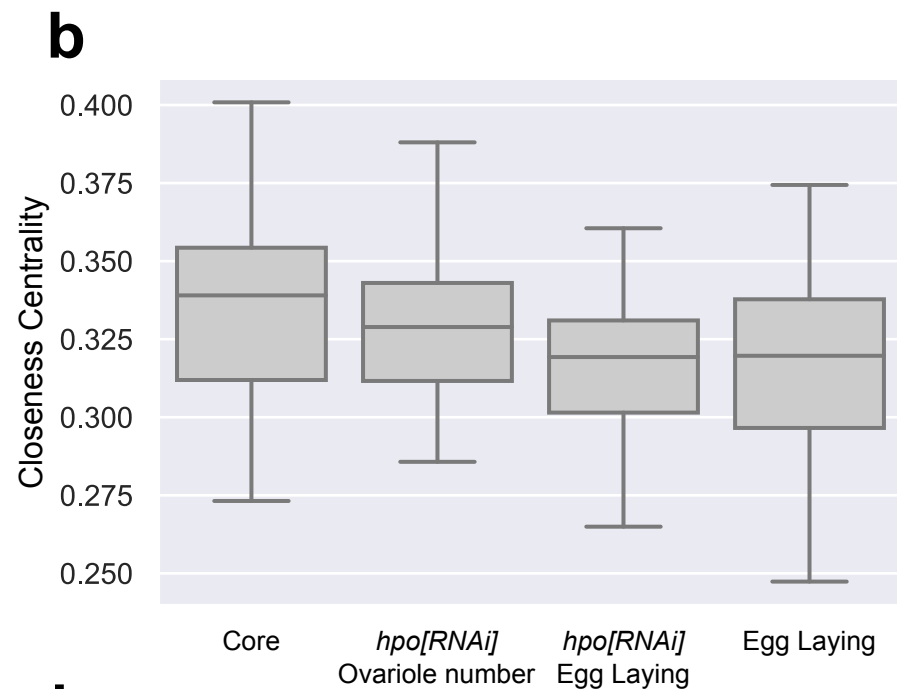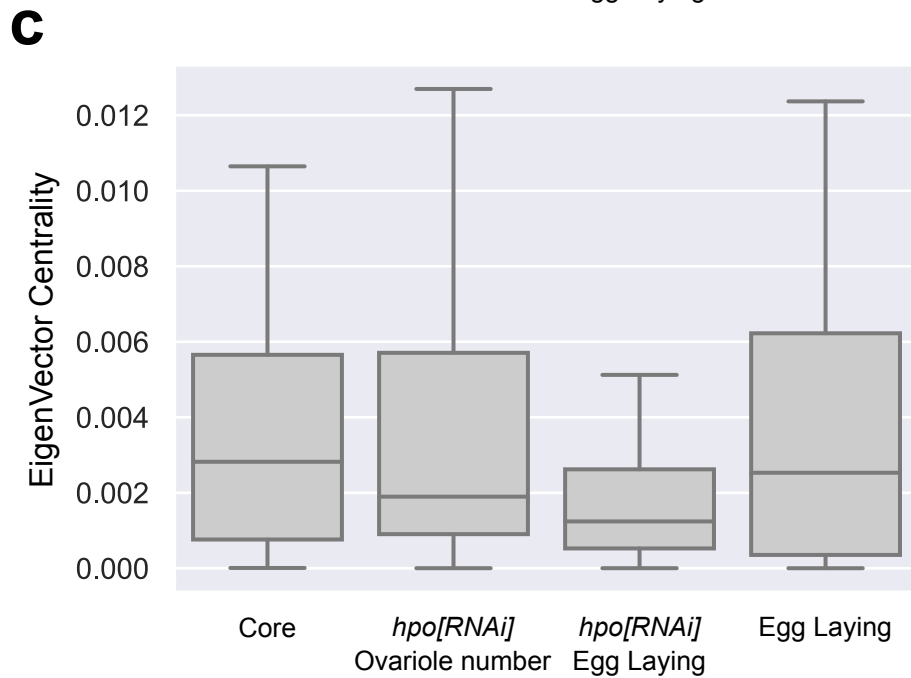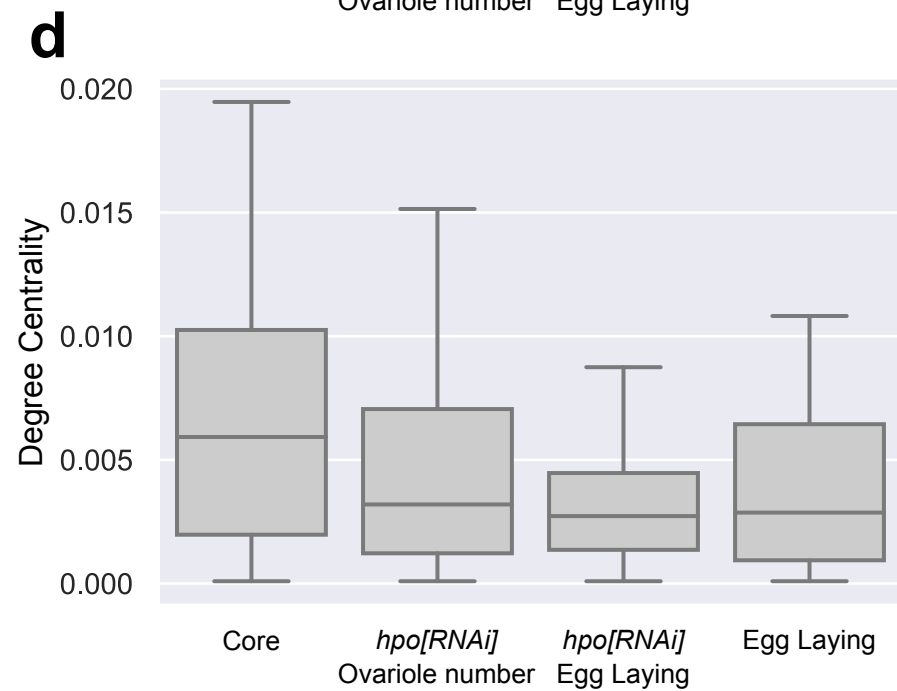

Supplement: supp [file elife-54082-supp-v1.zip › elife_poa_e54082_Figure_5_figure_supplement_4.pdf]

Fig 5 Supp 6

*hpo[RNAi]**hpo[RNAi]*

Egg Laying

Core

**a**

Ovariole Number

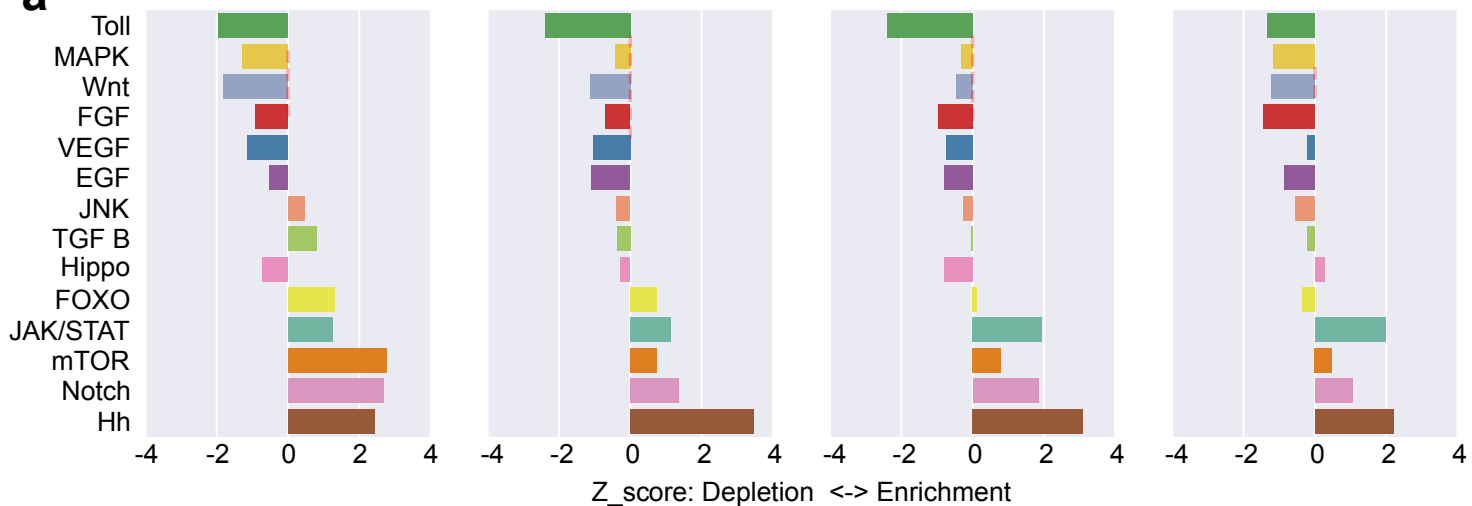**b**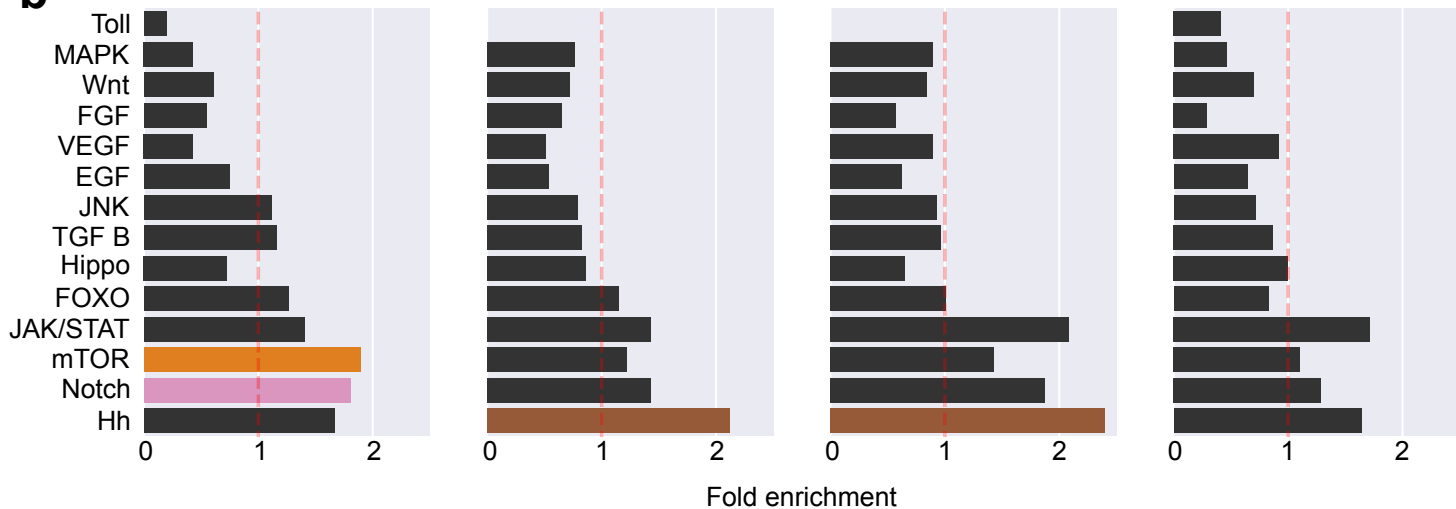

Supplement: supp [file elife-54082-supp-v1.zip › elife_poa_e54082_Figure_5_figure_supplement_6.pdf]
